# Supplementary material for: Tuna Species Substitution in the Spanish Commercial Chain: A Knock-On Effect
Source: PLoS One. 2017 Jan 26;12(1):e0170809. doi: 10.1371/journal.pone.0170809 (PMC5268641; doi:10.1371/journal.pone.0170809)
Supplement: S2 Table — (XLSX) [file pone.0170809.s005.xlsx]

## Sheet: restaurantes
Sample Code	Result	Seqs
R0115B21	Thunnus albacares	ACACGCAATCACACCATATTCATATATCGACCATATATAATAATGCTTTAGGACATATATGCATTAAAACCATTACTAGTACTAAACCATTCATATGTCAACAAACAATGAAGATTTACATAAACCATACATATATACCTTAACATTTAATCTAAGTCAAGTAATTAAACGAGATTTAAGACCTACCATAACAACTAAATCGTCTAAGCCATACCAAGTATCATCATTCCTAAAGTCAAGCAAATTTAAGCGCAGTAAGAGCCTACCATCCAGTCCATATCTTAATGCATACGGTTATTGAAGGTGAGGGACAATGATTGTGGGGGTAACACCTAGTGAATTATTCCTGGCATCTGGTTCCTAATTCAAC
R0115B31	Thunnus thynnus	AAAGAAAACACACCAAAAACCAAAAAGACACAAAAAACAACGACCCAGGACAAACAAGAACCAAAACCACCACCAGCACCAAACCACACATATGACAATAAATAATGAAGATTTACATAAACCATACAAATAAACCTCAGCATTCGTCTTGAATTCAGGCGATTAAACGAGATTTAAGACCTAACATAAATCTAAATCGTCTAAGCCATACCAAGTCTCCTCATCTCTGACATCTCGTAAACTTAAGCGCAGTAAGAGCCTACCATCCAGTCCATTTCTTAATGCATACGGTTATTGAAGGTGAGGGACAATAATTGTGGGGGTAACACTTAGTGAATTATTCCTGGCATCTGGTTCCTAATTCAAA
R0115B41	Thunnus obesus	ATATACAGTAATGTTCTAGGACATATATGTATTAAAACCATTACTAGTACTAAACCATTCATATGTCAACAAACAATGAAGACTTACATAAACCATACAGATATATTCCAACATTCGAATTAAGTCAAGTAATTAAACGAGATTTAAGACCTACCACAAACACTAAATCGTCTAAGCCATACCAAGTCTCCTCATCCCTGAAATCAAGTAAATTTAAGCGCAGTAAGAACCTACCATCCAGTCCATATCTTAATGCATACGGTTATTGAAGGTGAGGGACAATAATTGTGGGGGTAGCACTCAGTGAATTATTCCTGGCATCTGGTTCCTAATTCAA
R0115G21	Thunnus albacares	ATAATGCTTTAGGACATATATGTATTAAAACCATTACTAGTACTAAACCATTCATATGTCAACAAACAATGAAGATTTACATAAACCATACATATATATCTTAATATTCAATCTAAGTCAAGTAATTAAACGAGATTTAAGACCTACCATAACAACTAAATCGTCTAAGCCATACCAAGTATCCTCATTCCTAAAGTCAAGCAAATTTAAGCGCAGTAAGAGCCTACCATCCAGTCCATATCTTAATGCATACGGTTATTGAAGGTGAGGGACAATGATTGTGGGGGTAACACCTAGTGAATTATTCCTGGCATCTGGTTCCTAATTCAAC
R0115G31	Thunnus albacares	ATATGTAATTACACCATACTCATATATCGACCATATATAATAATGCTTTAGGACATATATGTATTAAAACCATTACTAGTACTAAACCATTCATATGTCAACAAACAATGAAGATTTACATAAACCATACAAATATATCTTAATATTCAATCTAAGTCGAGTGATTAAACGAGATTTAAGACCTACCATAACAACTAAATCGTCTAAGCCATACCAAGTATCCCCATTCCTAAAATCAGGTAAATTTAAGCGCAGTAAGAGCCTACCATCCAGTCCATATCTTAATGCATACGGTTATTGAAGGTGAGGGACAATAATTGTGGGGGTAGCACCTAGTGAATTATTCCTGGCATCTGGTTCCTAATTCA
R0115G41	Thunnus obesus	ATATGTAATTACACCATATCTATATATGAACCATATACAGTAATGTTCTAGGACATATATGTATTAAAACCATTACTAGTACTAAACCATTCATATATCAACAAACAATGAAGACTTACATAAACCATACAGATATATTCCAACATTAAAATTAAGTCAAGTAATTGAACGAGATTTAAGACCTACCACAAACACTAAATCGTCTAAGCCATACCAAGTCCCCTCATCCCTGAAATCAAGTAAATTTAAGCGCAGTAAGAGCCTACCATCCAGTCCATATCTTAATGCATACGGTTATTGAAGGTGAGGGACAATAATTGTGGGGGTAGCTCTCAGTGAATTATTCCTGGCATCTGGTTCCTAATTCA
R0115T11	Thunnus albacares	ATATGTAATTACACCATACTCATATATCAACCATATATAATAATGCTTTAGGACATATATGTATTAAAACCATTACTAGTACTAAACCATTCATATATCAACAAACAATGAAGATTTACATAAACCATACAGATATATCTTAATATTCAATCTAAGTCAGGTAATTAAACGAGATTTAAGACCTACCACAACAACTAAATCGTCTAAGCCATACCAAGTATCCTCATTCCTAAAGTCAGGTAAATTTAAGCGCAGTAAGAGCCTACCATCCAGTCCATATCTTAATGCATACGGTTATTGAAGGTGAGGGACAATGATTGTGGGGGTAACACCTAGTGAATTATTCCTGGCATCTGGTTCCTAATTCAAA
R0115T21	Thunnus obesus	ATATGTAATTACACCATATCTATATATGAACCATATACAGTAATGTTCTAGGACATATATGTATTAAAACCATTACTAGTACTAAACCATTCACATATCAACAAACAATGAAGACTTACATAAACCATACAGATATATTCCAACATTCAAATTAAGCCAAGTAATTAAACGAGATTTAAGACCTACCACAAACACTAAATCGTCTAAGCCATACCAAGTCCCCTCATCCCTGAAATCAAGTAAATTTAAGCGCAGTAAGAACCTACCATCCAGTCCATATCTTAATGCATACGGTTATTGAAGGTGAGGGACAATAATCGTGGGGGTAGCACTCAGTGAATTATTCCTGGCATCTGGTTCCTAATT
R0115T31	Thunnus thynnus	ATATGTAATTACACCATATTCATATATAGACCATATACAATAATGTTTTAGGACATATATGTATTAAAACCATTACTAGTATTAAACCATTCATATGTCAATAAATAATGAAGATTTACATAAACCATATAAATAAGTCTCAACATTCATCTTGAATTCAGGCGATTAAACGAGATTTAAGACCTAACATAAATCTAAATCGTCTAAGCCATACCAAGTCTCCTCATCTCTAACATCTCGTAAATTTAAGCGCAGTAAGAGCCTACCATCCAGTCCATTTCTTAATGCATACGGTTATTGAAGGTGAGGGACAATAATTGTGGGGGTAACACTTAGTGAACTATTCCTGGCATCTGGTTCCTAATT
R0115T41	Thunnus obesus	ATATGTAATTACACCATACTTATATATTAACCATATATAATAATGTTCTAGGACATACATGTATTAAAACCATTACTAGTATTAAACCATTCATATATCAACAAACAATGAAGGTTTACATAAACCATACAGGTATATCTCAATATCCATACTAAGTCAAGTAATTAAACGAAACTTAAGACCTACCACAAACACTAAATCGTCTAAGCCAAACCAAGTCCCATCATCTCTAAAATCAAGTAAATTTAAGCGCAGTAAGAGCCTACCATCCAGTCCATATCTTAATGCATACGGTTATTGAAGGTGAGGGACAATAATTGTGGGGGTAACACTTAGTGAATTATTCCTGGCATCTGGTTCCTAATTCAA
R0215B11	Thunnus thynnus	CTTTGTTCCCCGTGCGCGCATATTTCATATGTCTGCGCATGTACATATATGTAATTACACCATATCCATATATAGACCATATATAATAATGTTTTAGGACATATATGTATTAAAACCATTACTAGTATTAAACCATTCATATGTCAATAAATAATGAAGATTTACATAAACCATACAAATAAACCTCAACATTCATCTTGAATTCAGGCGATTAAACGAGATTTAAGATCTAACATAAACCTAAATCGTCTAAGCCATACCAAGTCCCCTCATCTCTGACGTCTCGTAAATTTAAGCGCAGTAAGAGCCTACCATCCAGTCCATTTCTTAATGCATACGGTTATTGAAGGTGAGGGACAATGATTGTGGGGGTAACACTTAGTGAATTATTCCTGGCAT…
R0215B21	Thunnus albacares	TTTGTTCCCCTGCGCACATATTTTAATATGTCTACGCATGTACATATATGTAATTACACCATACTCATATATCGACCATATATAATAATGCTTTAGGACATATATGTATTAAAACCATTACTAGTACTAAACCATTCATATGTCAACAAACAATGAAGATTTACATAAACCATACATATATATCTTAATATTTAATTTAAGTCAAGTAATTAAACGAGATTTAAGACCTACCATAACAACTAAATCGTCTAAGCCATACCAAGTATCCTCATTCCTAAAGTCAAGCAAATTTAAGCGCAGTAAGAGCCTACCATCCAGTCCATATCTTAATGCATACGGTTATTGAAGGTGAGGGACAATGATTGTGGGGGTAACACCTGGTGAATTATTCCTGGCATC…
R0215B31	Thunnus obesus	CCCATATTTCATATGTCTACGCACGTACATATATGTAATTACACCATACTTATATATTAACCATATACAATAATGTTCTAGGACATATATGTATTAAAACCATTACTAGTATTAAACCATTCATATGTCAACAAACAATGAAGGTTTACATAAACCATACAGACATATTCCAACATCCATACTAAGTCAAGTAATTAAACGAAACTTAAGACCTACCACAAACACTAAATCGTCTAAGCCAAACCAAGTCCCATCATCTCTAAAATCAAGTAAATTTAAGCGCAGTAAGAGCCTACCATCCAGTCCATATCTTAATGCATACGGTTATTGAAGGTGAGGGACAATAATTGTGGGGGTAACACTTAGTGAATTATTCCTGGCATCTGGTTCCTAATTCA
R0215B41	Thunnus albacares	CGGAACAATTAAACTATTCTTTGTTCCCCATGCGCACATATTTCATATGTCTACGCATGTACATATATGTAATTACACCATACTCATATATCGACCATATATAATAATGCTTTAGGACATATATGTATTAAAACCATTACTAGTACTAAACCATTCATATGTCAACAAACAATGAAGATTTACATAAACCATACATATATATCTTAATATTTAATCTAAGTCAAGTAATTAAACGAGATTTAAGACCTACCATAACAACTAAATCGTCTAAGCCATACCAAGTATCCTCATTCCTAAAGTCAAGCAAATTTAAGCGCAGTAAGAGCCTACCATCCAGTCCATATCTTAATGCATACGGTTATTGAAGGTGAGGGACAATGATTGTGGGGGTAACACCTA…
R0215B42	Thunnus albacares	TATGCGCACATATTTAATATGTCTACGCATGTACATATATGCAATCACACCATATTCTATATCGACCATATATAATAATGCTTTAGGACATATATGTATTAAAACCATTACTAGTACTAAACCATTCATATGTCAACAAACAATGAAGATTTACATAAACCATACAGATATATCTTAATATTCAGTCTAAGTCAAGTAATTAAACGAGATTTAAGACCTACCATAACGACTAAATCGTCTAAGCCATACCAAGTATCCTCATTCCTAAAATCAAGTAAATTTAAGCGCAGTAAGAGCCTACCATCCAGTCCATATCTTAATGCATACGGTTATTGAAGGTGAGGGACAATGATTGTGGGGGTAACACCTAGTGAATTATTCCTGGCATCTGGTTCCTAA…
R0215G21	Thunnus thynnus	AGTTCTAATTAACATTCTTTGTTCCCCGTGCGCGCATATTTCATATGTCTGCGCATGTACATATATGTAATTACACCATATTCATATATAGACCATATATAATAATGTTTTAGGACATATATGTATTAAAACCATTACTAGTACTAAACCATTCATATGTCAATAAATAATGAAGATTTACATAAACCATACAAATAAACCTCAACATTCATTTTGAATTCAGGCGATTGAACGAGATTTAAGACCTAACATAAACCTAAATCGTCTAAGCCATACCAAGTCTCCTCATCTCTGACATCTCGTAAACTTAAGCGCAGTAAGAGCCTACCATCCAGTCCATTTCTTAATGCATACGGTTATTGAAGGTGAGGGACAATGATTGTGGGGGTAACACTTAGT…
R0215G31	Thunnus thynnus	TGTTCCCCGTGCGCGCATATTTCATATGTCTGCGCATGTACATATATGTAATTACACCATATTCATATATAGACCATATATAATAATGTTTTAGGACATATATGTATTAAAACCATTACTAGTATTAAACCATTCATATGCCAATAAATAATGAAGATTTACATAAACCATACAAATAAACCTCAACATTCATCTTGAATTCAGGCGATTAAACGAGATTTAAGACCTAACATAAATCTAAATCGTCTAAGCCATACCAAGTCTCCTCATCTCTGACATCTCGTAAACTTAAGCGCAGTAAGAACCTACCATCCAGTCCATTTCTTAATGCATACGGTTATTGAAGGTGAGGGACAATAATTGTGGGGGTAACACCTAGTGAATTATTCCTGGCATCTG…
R0215G41	Thunnus thynnus	GGTTCTAATAAACTTTCTTTGTTCCCCGTGCGCGCATATTTCATATGTCTGCGCATGTACATATATGTAATTACACCATATTCATATATAGACCATATATAATAATGTTTTAGGACATATATGTATTAAAACCATTACTAGTATTAAACCATTCATATGTCAATAAATAATGAAGATTTACATAAACCATACAAATAAACCTCAGCATTCGTCTTGAATTCAGGCGATTAAACGAGATTTAAGACCTAACATAAATCTAAATCGTCTAAGCCATACCAAGTCTCCTCATCTCTGACATCTCGTAAACTTAAGCGCAGTAAGAGCCTACCATCCAGTCCATTTCTTAATGCATACGGTTATTGAAGGTGAGGGACAATAATTGTGGGGGTAACACTTAGT…
R0215G42	Thunnus thynnus	CGGGATTAATTAACCATTCTTTGTTCCCCGTGCGCGCATATTTCATATGTCTGCGCATGTACATATATGTAATTACACCATATTCATATATAGACCATATATAATAATGTTTTAGGACATACATGTATTAAAACCATTACTAGTATTAAACCATTCATATGCCAATAAATAATGAAGATTTACATAAACCATACAAATAAACCTCAACATTCATCTTGAATTCAAGCGATTAAACGAGATTTAAGACCTAACATAAATCTAAATCGTCTAAGCCACACCAAGTCTCCTCATCTCTGACATCTCGTAAACTTAAGCGCAGTAAGAGCCTACCATCCAGTCCATTTCTTAATGCATACGGTTATTGAAGGTGAGGGACAATAATTGTGGGGGTAACACTTA…
R0215T11	Thunnus obesus	AGAATAAATTAAACATTCTTTGCTCCCCGTGCGCACATATTTCATATGTCTGCGCACGTACATATATGTAATTACACCATATCTATATATGGACCATATACAGTAATGTTCTAGGACATATATGTATTAAAACCATTACTAGTACTAAACCATTCATATATCAACAAACAATGAAGACTTACATAAACCATACAGATATATTCCAGCATTCAAGTTAAGTCAAGTAATTAAACGAGATTTAAGACCTACCACAAACACTAAATCGTCTAAGCCATACCAAGTCTCCTCATCCCTAAAATCAGGTAAATTTAAGCGCAGTAAGAGCCTACCATCCAGTCCATATCTTAATGCATACGGTTATTGAAGGTGAGGGACAATAATTGTGGGGGTAACACTCAG…
R0215T21	Thunnus albacares	CGGATCTATTAAACATTCTTTGTTCATTATGCGCACATATTTCAATATGTCTACGCATGTACATATATGTAATTACACCATACTCATATATCGACCATATATAATAATGCTTTAGGACATACATGTATTAAAACCATTACTAGTACTAAACCATTCATATGTCAACAAATAATGAAGATTTACATAAACCATACAGATATATCTTAATATTCAATCTAAGTCAAGTAATTAAACGAGATTTAAGACCTACCATAACAACTAAATCGTCTAAGCCATACCAAGTATCCCCATTCCTAAAGTCAGGTAAATTTAAGCGCAGTAAGAGCCTACCATCCAGTCCATATCTTAATGCATACGGTTATTGAAGGTGAGGGACAATGATTGTGGGGGTAACACCTA…
R0215T31	Thunnus albacares	CTTTGTTCCCTATGCGCACATATTTAATATGTCTACGCATGTACATATATGTAATCACACCATACTCATATATCAACCATATATAATAATGCTTTAGGACATATATGTATTAAAACCATTACTAGTACTAAACCATTCATATGTCAACAAACAATGAAGATTTACATAAACCATGCAGATATATCTTAATATTCAATCTAAGTCAGGTAATTAAACGAGATTTAAGACCTACCACAACAACTAAATCGTCTAAGCCATACCAAGTATCCTCATTCCTAAAGTCGGGTAAATTTAAGCGCAGTAAGAGCCTACCATCCAGTCCATATCTTAATGCATACGGTTATTGAAGGTGAGGGACAATAATTGTGGGGGTAGCGCCTAGTGAATTATTCCTGGCAT…
R0215T41	Thunnus thynnus	TTGTTCCCCGTGCGCGCATATTTCATATGTCTGCGCATGTACATATATGTAATTACACCATATTCATATATAGACCATATATAATAATGTTTTAGGACATATATGTATTAAAACCATTACTAGTATTAAACCATTCATATGTCAATAAATAATGAAGATTTACATAAACCATACAAGTAAGCCTCAACATTCATCTTGAATTCAAGCGATTAAACGAGATTTAAGACCTAACATAAATCTAAATCGTCTAAGCCATACCAAGTCCCCTCATCTCTGACATCTCGTAAACTTAAGCGCAGTAAGAACCTACCATCCAGTCCATTTCTTAATGCATACGGTTATTGAAGGTGAGGGACAATAATTGTGGGGGTAACACTTAGTGAATTATTCCTGGCATCT…
R0215T42	Thunnus albacares	GGATCAAATTAACATTCTTTGTTCCCTATGCGCACATATTTCATATGTCTACGCATGTACATATATGTAATTACACCATACTCATATATCGACCATATATAATAATGCTTTAGGACATATATGTATTAAAACCATTACTAGTACTAAACCATTCATATGTCAACAAACAATGAAGATTTACATAAACCATACAGATATATCTTAATATTCAATCTAAGTCAAGTAATTAAACGAGATTTAAGACCTACCATAATAACTAAATCGTCTAAGCCATACCAAGTATCCTCATTCCTAAAGTCAGGTAAATTTAAGCGCAGTAAGAACCTACCATCCAGTCCATATCTTAATGCATACGGTTATTGAAGGTGAGGGACAATGATTGTGGGGGTAACACCTAGT…
R0315B21	Thunnus albacares	GGGCTATTATTAACTTTCTTTGTTCCCTATGCGCACATATTTCATATGTCTACGCATGTACATATATGTAATTACACCATATTCATATATCGACCATATATAATAATGCTTTAGGACATATATGTATTAACACCATCACTAGTACTAAACCATTCATATGTCAACAAACAATGAAGATTTACATAAACCATACAGATATATCTTAACATTCAACCTAAGTCAAGTAATTAGACGAGATTTAAGACCTACCATAATAACTAAATCGTCTAAGCCATACCAAGTATCCCCATCCCTAAAGTCAAGTAAATTTAAGCGCAGTAAGAGCCTACCATCCAGTCCATATCTTAATGCATACGGTTATTGAAGGTGAGGGACAATGATTGTGGGGGTAACACCTAG…
R0315B31	Thunnus thynnus	TGTTCCCCATGCGCAGATATTTACAATATGTCTGCGCATGTACATATATGTAATTACACCATAACTATATTTGAAACATATATAATAATGCTTTAGGACATGTATGTATTAAAACCATAACTAGTATTTAACCATTCATATGTCAACATATCATGAAGACTTACATAAAACATAGCAACCATCTCCCAACACTTTATTAATATCATGTAATTAGACGAGATTTAAGACCTAACATAAACCTAAATCGTCTAAGCCATACCAAGTCCCCTCATCTCTAAAATCCAGTAAACTTATGCGCAGTAAGAGCCTACCATCCAGTCCATTTCTTAATGCATACGGTTATTGAAGGTGAGGGACA
R0315B41	Thunnus thynnus	GGAATCTAATAAACATTCTTTGTTCCCCGTGCGCGCATATTTCATATGTCTGCGCATGTACATATATGTAATTACACCATATTCATATATAGACCATATATAATAATGTTTTAGGACATATATGTATTAAAACCATTACTAGTATTAAACCATTCATATGCCAATAAATAATGAAGATTTACATAAACCATACAAATAAACCTCAACATTCATCTTGAATTCAGGTGATTAAACGAGATTTAAGACCTAACATAAATCTAAATCGTCTAAGCCATACCAAGTCTCCTCATCTCTGACATCTCGTAAACTTAAGCGCAGTAAGAGCCTACCATCCAGTCCATTTCTTAATGCATACGGTTATTGAAGGTGAGGGACAATAATTGTGGGGGTAACACTTAG…
R0315G11	Thunnus thynnus	GGTTCTAATTAACCATTCTTTGTCCACCGTGCGCGCATATTTCATATGTCTGCGCATGTACATGTATGTAATTACACCATATTCATATATAGACCATATATAATAATGTTTCAGGACATATATGTATTAAAACCATTACTAGTATTAAACCATTCATATGTCAATAAATAATGAAGATTTACATAAACCATACAAATAAACCTCAACATTCATCTTGAATTCAGGCGATTAAACGAGATTTAAGACCTAACATAAATCTAAATCGTCTAAGCCATACCAAGTCTCCTCATCTCTGACATCTCGTAAACTTAAGCGCAGTAAGAGCCTACCATCCAGTCCATTTCTTAATGCATACGGTTATTGAAGGTGAGGGACAATAATTGTGGGGGTAACACTTAG…
R0315G21	Thunnus albacares	CGATCTAATTAAACATTCTTTGTTCCCTATGCGCACATATTTCATATGTCTACGCATGTACATATATGTAATTACACCATACTCATATATCGACCATATATAATAATGCTTTAGGACATATATGTATTAAAACCATTACTAGTACTAAACCATTCATATATCAACAAACAATGAAGATTTACATAAACCATACAGATATATCTTAATATTCAATCTAAGTCGAGTAATTAAACGAGATTTAAGACCTACCATAACAACTAAATCGTCTAAGCCATACCAAGTATCCCCATTCCTAAAGTCAGGTAAATTTAAGCGCAGTAAGAGCCTACCATCCAGTCCATATCTTAATGCATACGGTTATTGAAGGTGAGGGACAATGATTGTGGGGGTAACACCTAG…
R0315G31	Thunnus obesus	GGATCTAAATGAAAACATTTTTTGCTCCCCGTGCGCACATATTTCATATGTCTGCGCACGTACATATATGTAATTACACCATATCTATATATGGACCATATACAGTAATGTTCTAGGACATATATGTATTAAAACCATTACTAGTACTAAACCATTCATATATCAACAAACAATGAAGACTTACATAAACCATACAGATATATTCCAACATTCAAGCTAAGTCAGGTAATTAAACGAGATTTAAGACCTACCACAAACACTAAATCGTCTAAGCCATACCAAGTCCCCTCATCCCTGAAATCGAGTAAATCCAAGCGCAGTAAGAACCTACCATCCAGTCCATATCTTAATGCATACGGTTATTGAAGGTGAGGGACAATAATTGTGGGGGTAGCACTC…
R0315G41	Thunnus albacares	GGCATCTAATTAACCATTCTTTGTTCCCTATGCGCGCATATTTCATATGTCTACGCATGTACATATATGTAATTACACCATACTTATATATCGACCATATATAATAATGCTTTAGGACATATATGTATTAAAACCATTACTAGTACTAAACCATTCATATGTCAACAAACAATGAAGATTTACATAAACCATACAGATATATCTCAATATTCAATCTAAGTCAAGTAATTAAACGAGATTTAAGACCTACCATAACAACTAAATCGTCTAAGCCATACCAAGTATCCTCATCTCTAAAGTCAAGTAAATTTAAGCGCAGTAAGAGCCTACCATCCAGTCCATATCTTAATGCATACGGTTATTGAAGGTGAGGGACAATGATTGTGGGGGTAACACCTA…
R0315T11	Thunnus albacares	TGTTCCCTATGCGCACATATTTCATATGTCTACGCATGTACATATATGTAATTACACCATATTCATATATCGACCATATATAATAATGCTTTAGGACATATATGTATTAAAACCATTACTAGTACTAAACCATTCATATGTCAACAAACAATGAAGATTTACATAAACCATACAGATATATCTTAATATTCAGTCTAAGTCAAGTAATTAAACGAGATTTAAGACCTACCATAACGACTAAATCGTCTAAGCCATACCAAGTATCCTCATTCCTAAAGTCAAGTAAATTTAAGCGCAGTAAGAGCCTACCATCCAGTCCATATCTTAATGCATACGGTTATTGAAGGTGAGGGACAATGATTGTGGGGGTAACACCTAGTGAATTA
R0315T31	Thunnus albacares	CTATGCGCACATATTTAATATGTCTACGCACGAACACAAAAGAAACCACACCATACACACAAATCGACCAAAAAAAAAAAAGCAAAAGGACAAAAAAGAAACAAAACCAAAACAAGAACCAAACCAAACAAAAGACAACAAACAACGAAAACAAACACAAACCATACAGATACATCTTAACATCCAACCTAAGACAAGCAATCAAACGAGATCTAAGACCTACCATAACAACTAAATCGTCTAAGCCATACCAAGCATCCCCATACCTAAAGTCAGGTAAATTTAAGCGCAGTAAGAGCCTACCATCCAGTCCATATCTTAATGCATACGGTTATTGAAGGTGAGGGACAATGATTGTGGGGGTAACACCTAGTGAATTATTCCTGGCATCTGGTTCCTA
R0315T41	Thunnus obesus	TAACTTTCTTTGCTCCCCGTGCGCACATATTTAATATGTCTGCGTACGTACATATATGTAATTACACCATATCTATATATGGACCATATACAGTAATGTTTTAGGACATATATGTATTAAAACCATTACTAGTACTAAACCATTCATATATCAACAAACAATGAAGATTTACATAAACCATACAAACATATTCCAACATTCAAGTTAAATCAGGTAATTAAACGAGATTTAAGACCTACCACAAACACTAAATCGTCTAAGCCATACCAAGTCTCCTCATCCTTGAGATCGAGTAAACTTAAGCGCAGTAAGAACCTACCATCCAGTCCATATCTTAATGCATACGGTTATTGAAGGTGAGGGACAA
R0415B11	Thunnus albacares	GGCACTATAAACTTTCTTTGTTCACTATGCGCACATATTTCATATGTCTACGCATGTACATATATGTAATTACACCATACCCATATATCAACCATATATAATAATGCTTTAGGACATATATGTATTAAAACCATTACTAGTACCAAACCATTCATATGTCAACAAACAATGAAGATTTACATAAACCATACAGATATATCTTAACATTCAATCTAAGTCAGGTAATTAAACGAGATTTAAGACCTACCACAACAACTAAATCGTCTAAGCCATACCAAGTATCCTCATCCCTAAAGCCGGGTAAATTTAAGCGCAGTAAGAGCCTACCATCCAGTCCATATCTTAATGCATACGGTTATTGAAGGTGAGGGACAATGATTGTGGGGGTAACACCTAGTG…
R0415B31	Thunnus albacares	TGGTAAAAAAAGAAAAAAAGAAAAAAAAAAGATAAAGCAAGCCGTAAAAAATTATAGTCATACTTTGTTTGTTCCCTATGCGCACATATTTCATATGTCTACGCATGTACATATATGTAATTACACCATATTCATATATCGACCATATATAATAATGCTTTAGGACATATATGTATTAAAACCATTACTAGTACTAAACCATTCATATGTCAACAAATAATGAAGATTTACATAAACCATACAGATATGTCTTAATATTCAACCTAAGTCAAGTAATTAGACGAGATTTAAGACCTACCATAATAACTAAATCGTCTAAGCCATACCAAGTATCCCCATCCCTAAAGTCAAGTAAATTTAAGCGCAGTAAGAGCCTACCATCCAGTCCATATCTTAATG…
R0415B41	Thunnus thynnus	GGACTAATAAACATTCTTTGTTCACCGTGCGCGCATATTTCATATGTCTGCGCATGTACATATATGTAATTACACCATATTCATATATAGACCATATATAATAATGTTTTAGGACATATATGTATTAAAACCATTACTAGTACTAAACCATTCATATGTCAATAAATAATGAAGATTTACATAAACCATACAAATAAACCTCAACATTCATTTTGAATTCAGGCGATTGAACGAGATTTAAGACCTAACATAAACCTAAATCGTCTAAGCCATACCAAGTCTCCCCATCTCTGACATCTCGTAAACTTAAGCGCAGTAAGAGCCTACCATCCAGTCCATTTCTTAATGCATACGGTTATTGAAGGTGAGGGACAATGATTGTGGGGGTAACACTTAGTG…
R0415G11	Thunnus albacares	TTATAAACATTTCTTCTGTTCCCTATGCGCACATACATTAATATGACAACGCAAGAACAAAAAAGAAAACACACCAAACACAAAAAACGACCAAAAAAAAAAAAGAAAAAGGACAAAAAAGAAAAACAACCAAAACAAGAAAAAAACCAAACAAAAGACAACAAACAATGAAGATACACATAAACCATACAGATACATCTTAATATCCAACCTAAGACAAGCAATCAAACGAGATATAAGACCTACCATAACAACTAAATCGTCCAAGCCATACCAAGCATCCCCATCCCTAAAGTCAAGTAAATTTAAGCGCAGTAAGAGCCTACCATCCAGTCCATATCTTAATGCATACGGTTATTGAAGGTGAGGGACAATGATTGTGGGGGTAGCACCTAGTGA…
R0415G31	Thunnus thynnus	CTTTGTTCCCCGTGCGCGCATATTTCATATGTCTGCGCATGTACATATATGTAATTACACCATATCCATATATAGACCATATATAATAATGTTTTAGGACATATATGTATTAAAACCATTACTAGTATTAAACCATTCATATGTCAATAAATAATGAAGATTTACATAAACCATACAAATAAACCTCAACATTCATCTTGAATTCAGGCGATTAAACGAGATTTAAGATCTAACATAAACCTAAATCGTCTAAGCCATACCAAGTCCCCTCATCTCTGACGTCTCGTAAATTTAAGCGCAGTAAGAGCCTACCATCCAGTCCATTTCTTAATGCATACGGTTATTGAAGGTGAGGGACAATGATTGTGGGGGTAACACTTAGTGAATTATTCCTGGCAT…
R0415T11	Thunnus albacares	TGTGGCCCTATGCGCACATATTTCATATGTCTACGCATGTACATATATGTAATTACACCATACTCATATATCGACCATATATAATAATGCTTTAGGACATATATGTATTAAAACCATTACTAGTACTAAACCATTCATATGTCAACAAACAATGAAGATTTACATAAACCATACAGATATATCTTAACATTCAACCTAAGTCAAGTAATTAGACGAGATTTAAGACCTACCATAACAACTAAATCGTCTAAGCCATACCAAGTATCCCCATTCCTAAAGTCGAGTAAATTTAAGCGCAGTAAGAGCCTACCATCCAGTCCATATCTTAATGCATACGGTTATTGAAGGTGAGGGACAATGATAA
R0415T21	Thunnus albacares	ATGCGCACACAAAATAATACGACAACGCAAGAACAAAAAAGAAACCACACCACACACAAACAACGACCAAAAAAAACAAAGCCACAGGACAAAAAAGAAAAAAAACCAAAGCAAGAACTAAACCATACATATGACAACAAACAATGAAGATCTACATAAACCATACAGATATATCTTAATATTCAATCTAAGACAAGCAATTAAACGAGATTTAAGACCTACCATAACAACTAAATCGTCTAAGCCATACCAAGTATCCCCATTCCTAAAGTCAAGTAAATTTAAGCGCAGTAAGAGCCTACCATCCAGTCCATATCTTAATGCATACGGTTATTGAAGGTGAGGGACAATGATTGTGGGGGTAACACCTAGTGAATTATTCCTGGCATCTGGTTCCTA…
R0415T31	Thunnus thynnus	TTCTTTGTTCCCCGTGCGCGCATATTTCATATGTCTGCGCATGTACATATATGTAATTACACCATATTCATATATAGACCATATACAATAATGTTTTAGGACATATATGTATTAAAACCATTACTAGTATTAAACCATTCATATGTCAATAAATAATGAAGATTTACATAAACCATATAAATAAGTCTCAACATTCATCTTGAATTCAGGCGATTAAACGAGATTTAAAACCTAACATAAATCTAAATCGTCTAAGCCCTACCAAGTCTCCTCATCTCTAACATCTCGTAAATTTAAGCGCAGAAAAA
R0415T41	Thunnus thynnus	CTTTGTTCCCCGTGCGCGCATATTTCATATGTCTGCGCATGTACATATATGTAATTACACCATATCCATATATAGACCATATATAATAATGTTTTAGGACATATATGTATTAAAACCATTACTAGTATTAAACCATTCATATGTCAATAAATAATGAAGATTTACATAAACCATACAAATAAACCTCAACATTCATCTTGAATTCAGGCGATTAAACGAGATTTAAGATCTAACATAAACCTAAATCGTCTAAGCCATACCAAGTCCCCTCATCTCTGACGTCTCGTAAATTTAAGCGCAGTAAGAGCCTACCATCCAGTCCATTTCTTAATGCATACGGTTATTGAAGGTGAGGGACAATGATTGTGGGGGTAACACTTAGTGAATTATTCCTGGCAT…
R0515B11	Thunnus thynnus	GCTGCGCATGTACATATATGTAATTACACCATATTCATATATGGACCATATATAATAATGTTTTAGGACATATATGTATTAAAACCATTACTAGTATTAAACCATTCATATGTCAATAAATAATGAAGATTTACATAAACCATACAAATAAACCTCAACATTCATCTTGAATTCAGGCGATTAAACGAGATTTAAGACCTAACATAAATCTAAATCGTCTAAGCCACACCAAGTCTCCTCATCTCTGGCATCTCGTAAACTTAAGCGCAGTAAGAGCCTACCATCCAGTCCATTTCTTAATGCATACGGTTATTGAAGGTGAGGGACAATAATTGTGGGGGTAACACTTAGTGAATTATTCCTGGCATCTGGTTCCTAATT
R0515B21	Thunnus thynnus	CGCGCATATTTAATATGTCTGCGCATGTACATATATGTAATTACACCATATTCATATATAGACCATATATAATAATGTTTTAGGACATATATGTATTAAAACCATTACTAGTATTAAACCATTCATATGCCAATAAATAATGAAGATTTACATAAACCATACAAATAAACCTCAACATTCATCTTGAATTCAGGCGATTAAACGAGATTTAAGACCTAACATAAATCTAAATCGTCTAAGCCATACCAAGTCTCCTCATCTCTGACATCTCGTAAACTTAAGCGCAGTAAGAACCTACCATCCAGTCCATTTCTTAATGCATACGGTTATTGAAGGTGAGGGACAATAATTGTGGGGGTAACACCTAGTGAATTATTCCTGGCATCTGGTTCC
R0515B31	Thunnus albacares	CGTACGCATGTACATATATGTAATTACACCATACTCATATATCGACCATATATAATAATGCTTTAGGACATATATGTATTAAAACCATTACTAGTACTAAACCATTCATATGTCAACAAACAATGAAGATTTACATAAACCATACATGTATATCTTAATATTTAATCTAAGTCAGGTAATTAAACGAGATTTAAGACCTACCATAACAACTAAATCGTCTAAGCCATACCAAGTATCCCCATTCCTAAAGTCAAGCAAATTTAAGCGCAGTAAGAGCCTACCATCCAGTCCATATCTTAATGCATACGGTTATTGAAGGTGAGGGACAATGATTGTGGGGGTAACACCTAGTGAATTATTCCTGGCATCTGGTTCCTAATT
R0515B41	Thunnus albacares	TCTACGCATGTACATATATGTAATTACACCATACTCATATATCGACCATATATAATAATGCTTTAGGACATATATGTATTAAAACCATTACTAGTACTAAACCATTCATATATCAACAAACAATGAAGATTTACATAAACCATACAAATATATCTTAATATTCAATTTAAGTCAAGTAATTAAACGAGATTTAAGACCTACCATAACAACTAAATCGTCTAAGTCATACCAAGTATCCCCATTCCTAAAGTCAAGCAAATTTAAGCGCAGTAAGAGCCTACCATCCAGTCCATATCTTAATGCATACGGTTATTGAAGGTGAGGGACAATGATTGTGGGGGTAACACCTAGTGAATTATTCCTGGCATCT
R0515B42	Thunnus thynnus	GCTGCGCATGTACATATATGTAATTACACCATATTCATATATAGACCATATATAATAATGTTTTAGGACATATATGTATTAAAACCATTACTAGTATTAAACCATTCATATGTCAATAAATAATGAAGATTTACATAAACCATACAAATAAACCTCAACATTCATCTTGAATTCAGGTGATTAAACGAGATTTAAGACCTAACATAAATCTAAATCGTCTAAGCCATACCAAGTCTCCTCATCTCTGACATCTCGTAAACTTAAGCGCAGTAAGAACCTACCATCCAGTCCATTTCTTAATGCATACGGTTATTGAAGGTGAGGGACAATAATTGTGGGGGTAACACTTAGTGAATTATTCCTGGCATCTGGTTCCTAATT
R0515G11	Sarda sarda	TCTATTTTTAGTACATATATGTATTTACACCATACATTTATATTAACCATATCAATAATGTTTAAGGACATTAATGTATTATAACCATATATAGTATTAAACCATTCAAGTAATATATATAACGAAGGGTTACATAAACCAACTAGAGATTAATTATACACACATATATAGGGTACAGGCGAAATTTAAGACCGAACACAACATCCAATGAACAAAGATATACCAAGTACCCACCATCTCTTAAATTTCCAAAATCTTAATGTAGTAAGAACCTACCATCCAGTCCATATCTTAATGCATACGGTTATTGAAGGTGAGGGACAATAATTGTGGGGGTTTCACCCAGTGAACTATTCCTGGCATCTGGTTCCTAATTCAA
R0515G21	Thunnus thynnus	CATTAATATGTCTGCGCATGTACATATATGTAATTACACCATATTCATATATAGACCATATATAATAATGTTTTAGGACATACATGTATTAAAACCATTACTAGTATTAAACCATTCATATGCCAACAAACAATGAAGATTTACATAAACCATACAGATAAATCTCAACATTCATCTTGAATTCAGGCGATTAAACGAGATTTAAGACCTAACATAAATCTAAATCGTCTAAGCCATACCAAGTCCCCTCATCTCTGACATCTCGTAAACTTAAGCGCAGTAAGAGCCTACCATCCAGTCCATTTCTTAATGCATACGGTTATTGAAGGTGAGGGACAATAATTGTGGGGGTAACACTTAGTGAATTATTCCTGGCATCTGGTTCCTAATTCAAA
R0515G41	Thunnus albacares	ACATGTCTACGCATGTACATATATGTAATTACACCATACTCATATATCGACCATATATAATAATGCTTTAGGACATACATGTATTAAAACCATTACTAGTACTAAACCATTCATATATCAACAAATAATGAAGATTTACATAAACCATGCAAATATATCTTAATATTCAATCTAAGTCAAGTAATTAGACGAGATTTAAGACCTACCATAACAACTAAATCGTCTAAGCCATACCAAGTATCCCCATTCCTAAAGTCAGGTAAATTTAAGCGCAGTAAGAGCCTACCATCCAGTCCATATCTTAATGCATACGGTTATTGAAGGTGAGGGACAATGATTGTGGGGGTAACACCTAGTGAATTATTCCTGGCATCTGGTTCCTAATTCAAAA
R0515T21	Thunnus thynnus	CATTAATATGTCTGCGCATGTACATATATGTAATTACACCATATTCATATATAGACCATATATAATAATGTTTTAGGACATACATGTATTAAAACCATTACTAGTATTAAACCATTCATATGCCAACAAACAATGAAGATTTACATAAACCATACAGATAAATCTCAACATTCATCTTGAATTCAGGCGATTAAACGAGATTTAAGACCTAACATAAATCTAAATCGTCTAAGCCATACCAAGTCCCCTCATCTCTGACATCTCGTAAACTTAAGCGCAGTAAGAGCCTACCATCCAGTCCATTTCTTAATGCATACGGTTATTGAAGGTGAGGGACAATAATTGTGGGGGTAACACTTAGTGAATTATTCCTGGCATCTGGTTCCTAATTCAAA
R0515T31	Thunnus alalunga	AATCAATATGTCTGCGCATGTACATATATGTAATTACACCATAACTATATTTGAAACATATATAATAATGCTTTAGGACATGTATGTATTAAAACCATAACTAGTATTTAACCATTCATATGTCAACATATCATGAAGACTTACATAAAACATAGCAACCATCTCCCAACACTTTATTAATATCATGTAATTAGACGAGATTTAAGACCTAACATAAACCTAAATCGTCTAAGCCATACCAAGTCCCCTCATCTCTAAAATCCAGTAAACTTATGCGCAGTAAGAGCCTACCATCCAGTCCATTTCTTAATGCATACGGTTATTGAAGGTGAGGGACAATAATCGTGGGGGTAACACTTAGTGAATTATTCCTGGCATCTGGTTCCTAATTCAAA
R0515T41	Thunnus albacares	ATGTCTACGCATGTACATATATGTAATTACACCATACTCATATATCGACCATATATAATAATGCTTTAGGACATATATGTATTAAAACCATTACTAGTACTAAACCATTCATATGTCAACAAACAATGAAGATTTACATAAACCATACAAATATATCTTAATATTCAATCTAAGTCAAGTAATTAAACGAGATTTAAGACCTACCATAACAACTAAATCGTCTAAGCCATACCAAGTATCCTCATTCCTAAAATCAGGTAAACTTAAGCGCAGTAAGAGCCTACCATCCAGTCCATATCTTAATGCATACGGTTATTGAAGGTGAGGGACAATGATTGTGGGGGTAACACCTAGTGAATTATTCCTGGCA
R0515T42	Thunnus obesus	CGCACGCACGTCACACACGCAACCACACCACACCCACACACAGACACACACAACAACGCCCCAGGACCACACGCACCAAAACCACCACCAGCACCAAACCACCCACACGCCAACAAACAACGAAGACCCACACAAACCACACAAACACACCCCAACACCCAAACCAAGCCAAGCAACCAAACGAGACCCAAGACCCACCACAAACACCAAATCGTCTAAGCCACACCAAGCCCCCTCATCCCTGAGGCCAAGCAAACCTAAGCGCAGTAAGAGCCTACCATCCAGCCCATATCTTAATGCATACGGTTATTGAAGGTGAGGGACAATAATCGTGGGGGCAACACTTAGCGAATTATTCCTGGCATCTGGTTCCAAATTCAA
R0615B21	Thunnus obesus	GGTACATATATGTAATTACACCATACTTATATATTAACCATATATAATAATGTTCTAGGACATATATGTATTAAAACCATTACTAGTATTAAACCATTCATATATCAACAAACAACGAAGGTTTACATAAACCATACAGGTATATCTCAGCATCCATACTAAGTCAAGTAATTAAACGAAACTTAAGACCTACCACAAACACTAAATCGTCTAAGCCAAACCAAGTCCCATCATCTCTAAAATCAAGTAAATTTAAGCGCAGTAAGAGCCTACCATCCAGTCCATATCTTAATGCATACGGTTATTGAAGGTGAGGGACAATAATTGTGGGGGTAACACTTAGTGAATTATTCCTGGCATCTGGTTCCTAATTCAA
R0615B31	Thunnus albacares	CATGAATATGTCTACGCATGTACATATATGTAATTACACCATACTCATATATCGACCATATATAATAATGCTTTAGGACATATATGTATTAAAACCATTACTAGTACTAAACCATTCATATATCAACAAACAATGAAGATTTACATAAACCATGCAAATATATCTTAACATTCAACCTAAGTCAAGTAATTAGACGAGATTTAAGACCTACCATAACAACTAAATCGTCTAAGCCATACCAAGTATTCCCATCCCTAAAGTCAAGTAAATTTAAGCGCAGTAAGAGCCTACCATCCAGTCCATATCTTAATGCATACGGTTATTGAAGGTGAGGGACAATGATTGTGGGGGTAACACCTAGTGAATTATTCCTGGCATCTGGTTCCT
R0615B41	Thunnus thynnus	ATGTCTGCGCATGTACATATATGTAATTACACCATACTCATATATAGACCATATATAATAATGTTTTAGGACATATATGTATTAAAACCATTACTAGTATTAAACCATTCATATGTCAATAAATAATGAAGATTTACATAAACCATACAAATAAACCTCAACATTCATTTTGAATTCAGGCGATTAAACGAGATTTAAGACCTAACATAAATCTAAATCGTCTAAGCCATACCAAGTCTCCTCATCTCTGACATCTCGTAAACTTAAGCGCAGTAAGAGCCTACCATCCAGTCCATTTCTTAATGCATACGGTTATTGAAGGTGAGGGACAATAATTGTGGGGGTAACACTTAGTGAATTATTCCTGGCA
R0615G11	Thunnus obesus	CCATTAGTAGTAATAAACCATTCATATATCGGAAACAAGGAAGGTTTACATAAACCATACAGATATATCTCAGCATCCATCCTAAGTCAAGTAATTAAACGAAACTTAAGACCTACCACAAACACTAAATCGTCTAAGCCCAACCAAGTCCCATCATCTCTAAAATCAAGTAAATTTAAGCGCAGTAAGAGCCTACCATCGAGTCCATATTTTAATGTTTATGGGTATTGAAGGTGAGGGAGAATAATTGTGGGGGGGGCACAAAGTGAGATATTTCTGGGGCTGGTGTTTCATTTAACAAGGA
R0615G21	Thunnus thynnus	GTACAATATGTCTGTGCATGTACATATATGTAATTACACCATAACTATATTTAAAACATAAATAATAATGCTTTGAGACATATATGTATTACAACCATAACTAGTACTTAACCACTCATATGTCAACATATCATGAAGACTTACATAAAGCATGACAATTATCTTTCAACATCCTACCTACATCACGTAATTAAACGAGATTTAAGACCTACCATAAACCTAAATCGTCTAAGCCATACCAAGTCCCCTCATCTCTGAAATCTAGTAAACTTAAGCGCAGTAAGAGCCTACCATCCAGCTCATTTCTTAATGCATACGGTTATTGAAGGTGAGGGACAATAATTGTGGGGGTAACACTTAGTGAACTATTCCTGGCATCTGGTTCCT
R0615G31	Thunnus thynnus	TGTCTGCGCATGTACATATATGTAATTACACCATATTCATATATAGACCATATATAATAATGTTTCAGGACATACATGTATTAAAACCATTACTAGTATTAAACCATTCATATGCCAATAAATAATGAAGATTTACATAAACCATACAAATAAACCTCAACATTCATCTTGAATTCAAGCGATTAAACGAGATTTAAGACCTAACATAAATCTAAATCGTCTAAGCCACACCAAGTCTCCTCATCTCTGACATCTCGTAAACTTAAGCGCAGTAAGAGCCTACCATCCAGTCCATTTCTTAATGCATACGGTTATTGAAGGTGAGGGACAATAATTGTGGGGGTAACACTTAGTGAATTATTCCTGGCAT
R0615G41	Thunnus obesus	CTACGCACGTACATATATGTAATTACACCATACTTATATATTAACCATATATAATAATGTTCTAGGACATATATGTATTAAAACCATTACTAGTATTAAACCATTCATATGTCAACAAACAATGAAGGTTTACATAAACCATACAGGTATATCTCAACATCCATACTAAGTCAAGTAATTAAACGAAACTTAAGACCTACCACAAACACTAAATCGTCTAAGCCAAACCAAGTCCCATCATCTCTAAAATCAAGTAAATTTAAGCGCAGTAAGAGCCTACCATCCAGTCCATATCTTAATGCATACGGTTATTGAAGGTGAGGGACAATAATTGTGGGGGTAACACTTAGTGAATTATTCCTGGCATCTG
R0615T11	Thunnus albacares	CACATATTTAATATGTCTACGCATGTACATATATGTAATTACACCATACTCATATATCGACCATATATAATAATGCTTTAGGACATATATGTATTAAAACCATTACTAGTACTAAACCATTCATATGTCAACAAACAATGAAGATTTACATAAACCATACAGATATGTCTTAATATTCAGTCTAAGTCAAGTAATTAAACGAGATTTAAGACCTACCATAACAACTAAATCGTCTAAGCCATACCAAGTATCCTCATTCCTAAAGTCAGGTAAATTTAAGCGCAGTAAGAGCCTACCATCCAGTCCATATCTTAATGCATACGGTTATTGAAGGTGAGGGACAATGATTGTGGGGGTAACACCTAGTGAATTATTCCTGGCATCTGGTTCCTAATTC
R0615T21	Thunnus albacares	TTCATATGTCTACGCATGTACATATATGTAATTACACCATACTCATATATCGACCATATATAATAATGCTTTAGGACATATATGTATTAAAACCATTACTAGTACTAAACCATTCATATGTCAACAAACAATGAAGATTTACATAAACCATACAGATATATCTTAATATTCAATCTAAGTCAAGTAATTAGACGAGATTTAAGACCTACCATAATAACTAAATCGTCTAAGCCATACCAAGTATCCCCATTCCTAAAGTCAAGTAAATTTAAGCGCAGTAAGAGCCTACCATCCAGTCCATATCTTAATGCATACGGTTATTGAAGGTGAGGGACAATGATTGTGGGGGTAACACCTAGTGAATTATTCCTGGCATCTGGTTC
R0615T41	Thunnus albacares	TCATATATCGACCATATATAATAATGCTTTAGGACATATATGTATTAAGACCATTACTAGTACTAAACCATTCATATGTCAACAAACAATGAAGATTTACATAAACCATACATATATATCTTAGCATTTAATCTAAGTCAGGTAATTAAACGAGATTTAAGACCTACCACAACAACTAAATCGTCTAAGCCATACCAAGTATCCTCATCCCTAAAGTCAAGCAAATTTAAGCGCAGTAAGAGCCTACCATCCAGTCCATATCTTAATGCATACGGTTATTGAAGGTGAGGGACAATGATTGTGGGGGTAACACCTAGTGAATTATTCCTGGCATCTGGTTCCTAATTCAAAAATTGCCTTTGGGGGTTTG
R0715B41	Thunnus obesus	TCATATGTCTGCGCACGTACATATATGTAATCACACCATATCTATATATGGACCATATATAATAATGTTCTAGGACATATATGCATTAAAACCATTACTAGTACTAAACCATCCATATATCAACAAACAATGAAAACTTACATAAACCATACAAATATATCCCAACATTCAAATTAAGTCAAGTAATTAAACGAGATTTAAGACCTACCACAAACACTAAATCGTCTAAGCCATACCAAGTCTCCTCATCCCTGAAATCGAGTAAATTTATGCGCAGTAAGAACCTACCATCCAGTCCATATCTTAATGCATACGGTTATTGAAGGTGAGGGACAATAATTGTGGGGGTAGCACTCAGTGAATTATTCCTGGCATCTGGTT
R0715G11	Thunnus thynnus	GCCATGTACATATATGTAATCACACCATATTCATATATAGACCATATACAATAATGTTTTAGGACATATATGTATTAAAACCATTACTAGTATTAAACCATTCATATGTCAATAAATAATGAAGATTTACATAAACCATATAAATAAGTCTCAACATTCATCTTGAATTCAGGCGATTAAACGAGATTTAAGACCTAACATAAATCTAAATCGTCTAAGCCATACCAAGTCTCCTCATCTCTAACATCTCGTAAATCTAAGCGCAGTAAGAGCCTACCATCCAGTCCATTTCTTAATGCATACGGTTATTGAAGGTGAGGGACAATAATTGTGGGGGTAACACTTAGTGAACTATTCCTGGCATCTGGTTCCAAATTTCA
R0715G31	Thunnus thynnus	CGATATGTCTGCGCATGTACATATATGTAATCACACCATATTCATATATAGACCATATACAATAATGTTTTAGGACATATATGTATTAAAACCATTACTAGTATTAAACCATTCATATGTCAATAAATAATGAAGATTTACATAAACCATATAAATAAGTCTCAACATTCATCTTGAATTCAGGCGATTAAACGAGATTTAAGACCTAACATAAATCTAAATCGTCTAAGCCATACCAAGTCTCCTCATCTCTAACATCTCGTAAATTTAAGCGCAGTAAGAGCCTACCATCCAGTCCATTTCTTAATGCATACGGTTATTGAAGGTGAGGGACAATAATTGTGGGGGTAACACTTAGTGAACTATTCCTGGCATCTGGTT
R0715G41	Thunnus obesus	GTCTACGCACGTACATATATGTAATTACACCATACTTATATATTAACCATATATAATAATGTTCTAGGACATATATGTATTAAAACCATTACTAGTATTAAACCATTCATATATCAACAAACAACGAAGGTTTACATAAACCATACAGGTATATCTCAACATCCATACTAAGTCAAGTAATTAAACGAAACTTAAGACCTACCACAAACACTAAATCGTCTAAGCCAAACCAAGTCCCATCATCTCTAAAATCAAGTAAATTTAAGCGCAGTAAGAGCCTACCATCCAGTCCATATCTTAATGCATACGGTTATTGAAGGTGAGGGACAATAATTGTGGGGGTAACACTTAGTGAATTATTCCTGGCATC
R0715T11	Thunnus albacares	TCTCATATGTCTACGCATGTACATATATGTAATTACACCATACTCATATATCGACCATATATAATAATGCTTTAGGACATATATGTATTAAAACCATTACTAGTACTAAACCATTCATATATCAACAAATAATGAAGATTTACATAAACCATACAGATATATCTTAATATTCAACCTAAGTCAAGTAATTAGACGAGATTTAAGACCTACCATAACAACTAAATCGTCTAAGCCATACCAAGTACCCCCATCCCTAAAATCAAGTAAATTTAAACGCAGTAAGAGCCTACCATCCAGTCCATATCTTAATGCATACGGTTATTGAAGGTGAGGGACAATGATTGTGGGGGTAACACCTAGTGAATTATTCCTGGCATCTGGTTCCTA
R0715T21	Thunnus albacares	TCTACGCATGTACATATATGTAATTACACCATACTCATATATCGACCATATATAATAATGCTTTAGGACATATATGTATTAAAACCATTACTAGTACTAAACCATTCATATGTCAACAAACAATGAAGATTTACATAAACCATACAGATATATCTTAATATTCAGTCTAAGTCGAGTAATTAAACGAGATTTAAGACCTACCATAACAACTAAATCGTCTAAGCCATACCAAGTATCCCCATTCCTAAAGTCAGGTAAATTTAAGCGCAGTAAGAGCCTACCATCCAGTCCATATCTTAATGCATACGGTTATTGAAGGTGAGGGACAATGATTGTGGGGGTAGCACCTAGTGAATTATTCCTGGCATCT
R0715T31	Thunnus thynnus	ATTTTAATATGTCTGCGCATGTACATATATGTAATTACACCATATTCATATATAGACCATATATAATAATGTTTTAGGACATACATGTATTAAAACCATTACTAGTATTAAACCATTCATATGCCAATAAATAATGAAGATTTACATAAACCATACAAATAAACCTCAACATTCATCTTGAACTCAAGCGATTAAACGAGATTTAAGACCTAACATAAATCTAAATCGTCTAAGCCACACCAAGTCTCCTCATCTCTGACATCTCGTAAACTTAAGCGCAGTAAGAGCCTACCATCCAGTCCATTTCTTAATGCATACGGTTATTGAAGGTGAGGGACAATAATTGTGGGGGTAACACTTAGTGAATTATTCCTGGCATCTGGTTCCAATTCA
R0715T41	Thunnus albacares	CTACGCATGTACATATATGTAATTACACCATACTCATATATCGACCATATATAATAATGCTTTAGGACATACATGTATTAAAACCATTACTAGTACTAAACCATTCATATGTCAACAAACAATGAAGACTTACATAAACCATACAGATATATCTTAACATTCAACCTAAGTCAAGTAATTAAACGAGATTTAAGACCTACCATAACAACTAAATCGTCTAAGCCATACCAAGTATCCTCATTCCTAAAGTCAAGTAAATTTAAGCGCAGTAAGAGCCTACCATCCAGTCCATATCTTAATGCATACGGTTATTGAAGGTGAGGGACAATGATTGTGGGGGTAACACCTAGTGAATTATTCCTGGCATCTG
R0815B11	Thunnus thynnus	AATGTTTTAGGACATATATGTATTAAAACCATTACTAGTATTAAACCATTCATATGTCAATAAATAATGAAGATTTACATAAACCATGCAAATAAACCTCAACATTCATCTTGAATTCAGGCGATTAAACGAGATTTAAGACCTAACATAAATCTAAATCGTCTAAGCCATACCAAGTCTCCTCATCTCTGACATCTCGTAAACTTAAGCGCAGTAAGAGCCTACCATCCAGTCCATTTCTTAATGCATACGGTTATTGAAGGTGAGGGACAATAATTGTGGGGGTAACACTTAGTGAATTATTCCTGGCATCTGGTTCCTAATT
R0815B21	Thunnus thynnus	AATGTTTTAGGACATATATGTATTAAAACCATTACTAGTATTAAACCATTCATATGTCAATAAATAATGAAGATTTACATAAACCATGCAAATAAACCTCAACATTCATCTTGAATTCAGGCGATTAAACGAGATTTAAGACCTAACATAAATCTAAATCGTCTAAGCCATACCAAGTCTCCTCATCTCTGACATCTCGTAAACTTAAGCGCAGTAAGAGCCTACCATCCAGTCCATTTCTTAATGCATACGGTTATTGAAGGTGAGGGACAATAATTGTGGGGGTAACACTTAGTGAATTATTCCTGGCATCTGGTTCCTAATT
R0815B31	Thunnus thynnus	CCGAATCTAATAAAAGTTTCTTTGTTCCCCGTGCGCGCATCGGAAATATGTCTGTGCATGTACATATATGTAATTACACCATATTCATATATAGACCATATATAATAATGTTTTAGGACATATATGTATTAAAACCATTACTAGTATTAAACCATTCATATGCCAATAAATAATGAAGATTTACATAAACCATACAAATAAACCTCAACATTCATCTTGAATTCAGGCGATTAAACGAGATTTAAGACCTAACATAAATCTAAATCGTCTAAGCCATACCAAGTCTCCTCATCTCTGACATCTCGTAAACTTAAGCGCAGTAAGAGCCTACCATCCAGTCCATTTCTTAATGCATACGGTTATTGAAGGTGAGGGACAATAATTGTGGGGGTAACACTT…
R0815B41	Thunnus thynnus	CGGACGGGATGTTGTTCTTTGTTTCCCGTGCGCGCATATTTCATATGTCTGCGCATGTACATATATGTAATTACACCATATTCATATATAGACCATATATAATAATGTTTTAGGACATATATGTATTAAAACCATTACTAGTACTAAACCATTCATATGTCAATAAATAATGAAGATTTACATAAACCATACAAATAAACCTCAACATTCATCCTGAATTCAGGCGATTAAACGAGATTTAAGACCTAGCATAAATCTAAATCGTCTAAGCCATACCAAGTCTCCTCATCTCTGACATCTCGTAAACTTAAGCGCAGTAAGAGCCTACCATCCAGTCCATTTCTTAATGCATACGGTTATTGAAGGTGAGGGACAATAATTGTGGGGGTAACACTCAGT…
R0815G11	Thunnus thynnus	CCTGCGCATGTACATATATGTAATTACACCATATTCATATATAGACCATATATAATAATGTTTTAGGACATATATGTATTAAAACCATTACTAGTATTGAACCATTCATATGCCAATAAATAATGAAGATTTACATAAACCATACAAATAAACCTAAACATTCATCTTGAATTCAGGCGATTAAACGAGATTTAAGACCTAACATAAATCTAAATCGTCTAAGCCATACCAAGTCTCCTCATCTCTGACATCTCGTAAACTTAAGCGCAGTAAGAGCCTACCATCCAGTCCATTTCTTAATGCATACGGTTATTGAAGGTGAGGGACAATAATTGTGGGGGTAACACTTAGTGAATTAGTCCTGGCATCTGGTTCCTAATTCAA
R0815G21	Thunnus albacares	TTGGTTAAGATTCTTTGTTCCCTATGCGCACATATTTCATATGTCTACGCATGTACATATATGTAATTACACCATACTTATATATCAACCATATATAATAATGCTTTAGGACATATATGTATTAAAACCATTACTAGTACTAAACCATTCATATGTCAATAAACAATGAAGATTTACATAAACCATACAGATATATCTTAATATTCAATCTAAGTCAGGTAATTAAACGAGATTTAAGACCTACCACAACAACTAAATCGTCTAAGCCATACCAAGTATCCTCATTCCTAAAGCCAGGTAAATTTAAGCGCAGTAAGAGCCTACCATCCAGTCCATATCTTAATGCATACGGTTATTGAAGGTGAGGGACAACAATTGTGGGGGTAACACCTAGTGAAT…
R0815G31	Thunnus albacares	ACACCATACTCATATATCGACCATATATAATAATGCTTTAGGACATATATGTATTAAAACCATTACTAGTACTAAACCATTCATATGTCAACAAACAATGAAGACTTACATAAACCATACAGATATATCTTAACATTCAACCTAAGTCAAGTAATTAAACGAGATTTAAGACCTACCATAACAACTAAATCGTCTAAGCCATACCAAGTATCCCCATTCCTAAAGTCGGGTAAATTTAAGCGCAGTAAGAGCCTACCATCCAGTCCATATCTTAATGCATACGGTTATTGAAGGTGAGGGACAATGATTGTGGGGGTAACACCTAGTGAATTATTCCTGGCATCTGGTTCCTA
R0815G41	Thunnus albacares	TTACTATGACGCACATATTTCATATGTCTACGCATGTACATATATGTAATTACACCATACTCATATATCGACCATATATAATAATGCTTTAGGACATATATGTATTAAAACCATTACTAGTACTAAACCATTCATATGTCAACAAACAATGAAGATTTACATAAACCATACAGATATATCTTAACATTCAACCTAAGTCAAGTAATTAGACGAGATTTAAGACCTACCATAACAACTAAATCGTCTAAGCCATACCAAGTATCCCCATTCCTAAAATCGAGTAAATTTAAGCGCAGTAAGAACCTACCATCCAGTCCATATCTTAATGCATACGGTTATTGAAGGTGAGGGACAATGATTGTGGGGGTAACACCTAGTGAATTATTCCTGGCATCTGGT…
R0815T21	Thunnus albacares	GACACACACGCACCAAAACCACCACCAGCACCAAACCACCCACACACCAACAAACAATGAAGATCTACATAAACCATACAAATATATCTTAACATCCAACCTAAGCCAAGCAATTAGACGAGATTTAAGACCTACCACAACAACTAAATCGTCTAAGCCATACCAAGCATCCCCATTCCTAAAGTCAAGTAAATTTAAGCGCAGTAAGAACCTACCATCCAGTCCATATCTTAATGCATACGGTTATTGAAGGTGAGGGACAATAATTGTGGGGGTAACACCTAGTGAATTATTCCTGGCATCTGGTTCC
R0815T31	Thunnus thynnus	GCGCCACCTTAACACGTCCGCGCACGCACACACATGCAACCACACCACACCCCACACAGACCACACACAATAACGCCTTAGGACATATATGCACTAAAACCATCACTAGTACTAAACCATCCATATGTCAATAAATAATGAAGATTTACATAAACCATACAAATAAACCTCAACATTCATTTTGAATTCAGGCGATTGAACGAGATTTAAGACCTAACATAAACCTAAATCGTCTAAGCCATACCAAGTCTCCTCATCTCTGACATCTCGTAAACTTAAGCGCAGTAAGAGCCTACCATCCAGTCCATTTCTTAATGCATACGGTTATTGAAGGTGAGGGACAATGATTGTGGGGGTAACACTTAGTGAATTATTCCTGGCATCTGGTTCCTAA
R0815T41	Thunnus albacares	TGCGCACATATTTCATATGTCTACGCATGTACATATATGTAATTACACCATACTCATATATCGACCATATATAATAATGCTTTAGGACATATATGTATTAAAACCATTACTAGTACTAAACCATTCATATGTCAACAAACAATGAAGATTTACATAAACCATACAGATATACCTCAATATTCGATCTAAGTCAAGTAATTAGACGAGATTTAAGACCTACCATAACAACTAAATCGTCTAAGCCATACCAAGTATCCTCATTCCTAAAGTCGGGTAAATTTAAGCGCAGTAAGAGCCTACCATCCAGTCCATATCTTAATGCATACGGTTATTGAAGGTGAGGGACAATGATTGTGGGGGTAACACCTAGTGAATTATTCCTGGCATCTGGTTCCTAAT…
R0915B41	Thunnus albacares	TCTTAACATTCTTTGTTCCCTATGCGCACATATTTCATATGTCTACGCATGTACATATATGTAATTACACCATACTCATATATCGACCATATATAATAATGCTTTAGGACATATATGTATTAAAACCATTACTAGTACTAAACCATTCATATGTCAACAAACAATGAAGATTTACATAAACCATACAGATACATCTTAATATTCAATCTAAGTCAAGTAATTAGACGAGATTTAAGACCTACCAATAACAACTAAATCGTCTAAGCCATACCAAGTATCCCCATTCCTAAAGTCAGGTAAATTTAAGCGCAGTAAGAGCCTACCATCCAGTCCATATCTTAATGCATACGGTTATTGAAGGTGAGGGACAATGATTGTGAGGGTAACACCTAGTGAATT…
R0915B42	Thunnus obesus	CAAAGACTAACACGTCCACGCACGTACACACATGTAATCACACCATATTTATATATTAACCATATATAATAATGTTCTAGGACATATATGTATTAAAACCATTACTAGTACTAAACCATTCATATATCAACAAACAATGAAGGTTTACATAAACCATACAGATATATCTCAACATCCATCCTAAGTCAAGTAATTAAACGAAACTTAAGACCTACCACAAACACTAAATCGTCTAAGCCAAACCAAGTCCCATCATCTCTAAAATCAAGTAAATTTAAGCGCAGTAAGAGCCTACCATCCAGTCCATATCTTAATGCATACGGTTATTGAAGGTGAGGGACAATAATTGTGGGGGTAACACTCAGTGAATTATTCCTGGCATCTGGTTCCT
R0915G11	Thunnus albacares	TATTTAATATGTCTACGCATGTACATATATGTAATTACACCATACTCATATATCGACCGTATATAATAATGCTTTAGGACATATATGTATTAAAACCATTACTAGTACTAAACCATTCATATGTCAACAAACAATGAAGACGTACATAAACCATACATATATATCTTAATATTTAATCTAAGTCAAGTAATTAAACGAGATTTAAGACCTACCATAACAACTAAATCGTCTAAGCCATACCAAGTATCCTCATTCCTAAAGTCAAGCAAATTTAAGCGCAGTAAGAGCCTACCATCCAGTCCATATCTTAATGCATACGGTTATTGAAGGTGAGGGACAATGATTGTGGGGGTAACACCTAGTGAATTATTCCTGGCATCTGGTTCCTAATTCAACA
R0915G21	Thunnus albacares	AAATTAACATTCTTTGTTCCCCTGCGCACATATTTCATATGTCTACGCATGTACATATATGTAATTACACCATACTCATATATCGACCATATATAATAATGCTTTAGGACATACATGTATTAAAACCATTACTAGTACTAAACCATTCATATGTCAACAAACAATGAAGATTTACATAAACCATACATATATATCTTAATATTTAATCTAAGTCAAGTAATTAAACGAGATTTAAGACCTACCATAATAACTAAATCGTCTAAGCCATACCAAGTATCCTCATTCCTAAAGTCAAGCAAATTTAAGCGCAGTAAGAACCTACCATCCAGTCCATATCTTAATGCATACGGTTATTGAAGGTGAGGGACAATGATTGTGGGGGTAACACCTAGTGAATTA…
R0915G31	Thunnus albacares	CGCACATATTTTCATATGTCTACGCATGTACATATATGTAATTACACCATACTCATATATCGACCATATATAATAATGCTTTAGGACATACATGTATTAAAACCATTACTAGTACTAAACCATTCATATGTCAACAAACAATGAAGACTTACATAAACCATACATATATATCTTAATATTTAATCTAAGTCAAGTAATTAAACGAGATTTAAGACCTACCATAACAACTAAATCGTCTAAGCCATACCAAGTATCCTCATTCCTAAAGTCAAGCAAATTTAAGCGCAGTAAGAGCCTACCATCCAGTCCATATCTTAATGCATACGGTTATTGAAGGTGAGGGACAATGATTGTGGGGGTAACACCTAGTGAATTATTCCTGGCATCTGGTTCCTAATA…
R0915G41	Thunnus albacares	TACACCATACTCATATATCGACCATATATAATAATGCTTTAGGACATATATGTATTAAAACCATTACTAGTACTAAACCATTCATATGTCAACAAACAATGAAGATTTACATAAACCATACATATATATCTTAATATTTAATCTAAGTCAAGTAATTAAACGAGATTTAAGATCTACCATAACAACTAAATCGTCTAAGCCACACCAAGTATCCTCATTCCTAAAGTCAAGCAAATTTAAGCGCAGTAAGAGCCTACCATCCAGTCCATATCTTAATGCATACGGTTATTGAAGGTGAGGGACAATGATTGTGGGGGTAGCACCTAGTGAATTATTCCTGGCATCTGGTTCCTAATT
R0915G42	Thunnus thynnus	ACGCAACCACACCACACCCCACACAGACCCACACAATAACGCCTTAGGACATATATGTATTAAAACCATTACTAGTATTAAACCATTCATATGTCAATAAATAATGAAGATTTACATAAACCATACAAGTAAGCCTCAACATTCACCTTGAATTCAGGCGATTAAACGAGATTTAAGACCTAACATAAATCTAAATCGTCTAAGCCATACCAAGTCTCCTCATCTCTGACATCTCGTAAACTTAAGCGCAGTAAGAACCTACCATCCAGTCCATTTCTTAATGCATACGGTTATTGAAGGTGAGGGACAATAATTGTGGGGGTAACACTTAGTGAATTATTCCTGGCATCTGGTTCCTAAT
R0915T21	Thunnus albacares	AAAAGAAACGATTCTTTGTTCCCTATGCGCACATATTTCATATGTCTACGCATGTACATATATGTAATTACACCATACTCATATATCGACCATATATAATAATGCTTTAGGACATATATGTATTAAAACCATTACTAGTACTAAACCATTCATATGTCAACAAACAATGAAGATTTACATAAACCATACAGATATATCTTAATATTCAATCTAAGTCAAGTAATTAAACGAGATTTAAGACCTACCACAACAACTAACTCGTCTAAGCCATACCAAGTATCCTCATTCCTAAAATCGAGTAAATTTAAACGCAGTAAGAGCCTACCATCCAGTCCATATCTTAATGCATACGGTTATTGAAGGTGAGGGACAATAATTGTGGGGGTAACACCTAGTGAA…
R0915T31	Thunnus thynnus	GCAACCACACCAAACCCCACACAGACCATATACAATAATGCTTTAGGACATATATGTATTAAAACCATTACTAGTATTAAACCATTCATATGTCAATAAATAATGAAGATTTACATAAACCATATAAATAAGCCTCAACATTCACCTTGAATTCAGGCGATTAAACGAGATTTAAGACCTAACATAAATCTAAATCGTCTAAGCCATACCAAGTCTCCTCATCTCTAACATCTCGTAAACTTAAGCGCAGTAAGAGCCTACCATCCAGTCCATTTCTTAATGCATACGGTTATTGAAGGTGAGGGACAATAATTGTGGGGGTAACACTTAGTGAACTATTCCTGGCATCTGGTTCC
R0915T41	Thunnus thynnus	CAACGCCCCAGGAACACACGCACCAAAACCACCACCAGCACCAAACCACCCACACGCCAACAAACAACGAAGATCTACATAAACCATACAAATAAACCTCAACATCCATCTTGAATCCAGGCGATTAAACGAGATTTAAGACCTAGCATAAATCTAAATCGTCTAAGCCACACCAAGCCTCCTCATCTCTGACATCTACGTAAACTTAAGCGCAGTAAGAGCCTACCATCCAGTCCATTTCTTAATGCATACGGTTATTGAAGGTGAGGGACAATAATTGTGGGGGTAACACTTAGTGAATTATTCCTGGCATCTGGTTCCA
R0915T42	Thunnus obesus	TTTAAACGTTACGCCGCAACAAAGAATACACACACCCCAACCAACACACACAAAACGCCCCAGGAACACACGTCCAAAACCCCACCAGCACCAAACCACCCCACACCAACAAACAACGAAGGCCTACACAAACCATACAGACACACCCCAACATCCACACTAAGCCAAGCAATCAAACGAAACCTAAGACCTACCACAAACATTAAATCGTCTAAGCCAAACCAAGCCTCATCATCTCTAAAATCAGGTAAATCTAAGCGCAGTAAGAGCCTACCATCCAGTCCATATCTTAATGCATACGGTTATTGAAGGTGAGGGACAATAATTGTGGGGGTAACACTTAGTGAATTATTCCTGGCATCTGGTTCCAAT
R1015B21	Thunnus albacares	TGCACATATTTCATATGTCTACGCATGTACATATATGTAATTACACCATACTCATATATTAACCATATATAATAATGCTTTAGGACATATATGTATTAAAACCATTACTAGTACTGAACCATTCATATGTCAACAAGCAATGAAGATTTACATAAACCATACAGATATATCTTAATATTCAATCTAAGTCAAGTAATTAGACGAGATTTAAGACCTACCACAATAACTAAATCGTCTAAGCCATACCAAGTATCCCCATTCCTAAAGTCAGGTAAATTTAAGCGCAGTAAGAGCCTACCATCCAGTCCATATATTAATGCATACGGTTATTGAAGGTGAGGGACAATGATTGTGGGGGTAACACCTAGTGAATTATTCCTGGCATCTGGTTCCTAATTC…
R1015B31	Thunnus albacares	CCCTAAAACGCCAACGCACGCACACACACGCAAACACACCACACCCACACACCAACCACACACAACAACGCCCCAGGACACACAAGCACCAAAACCACCACCAGCACCAAACCACCCACACGCCAACAAACAACGAAGATCCACACAAACCATACAGATACATCTTAATATCCAAGCTAAGCCAGGTAATCAAACGAGATCTAAGACCTACCACAACAACTAAATCGTCTAAGCCATACCAAGCATCCTCATCCCTAAAGCCAGGTAAATCTAAGCGCAGTAAGAGCCTACCATCCAGTCCATATCTTAATGCATACGGTTATTGAAGGTGAGGGACAATGATTGTGGGGGTAACACCTAGTGAATTATTCCTGGCATCTGGTTCCA
R1015B41	Thunnus obesus	TTTAAACGTTACGCCGCAACAAAGAATACACACACCCCAACCAACACACACAAAACGCCCCAGGAACACACGTCCAAAACCCCACCAGCACCAAACCACCCCACACCAACAAACAACGAAGGCCTACACAAACCATACAGACACACCCCAACATCCACACTAAGCCAAGCAATCAAACGAAACCTAAGACCTACCACAAACATTAAATCGTCTAAGCCAAACCAAGCCTCATCATCTCTAAAATCAGGTAAATCTAAGCGCAGTAAGAGCCTACCATCCAGTCCATATCTTAATGCATACGGTTATTGAAGGTGAGGGACAATAATTGTGGGGGTAACACTTAGTGAATTATTCCTGGCATCTGGTTCCAAT
R1015G21	Thunnus albacares	TGCGCACATATTTAATATGTCCACGCATGTACATACACGTAATCACACCATACTCATATATCAACCATATATAATAATGCTTTAGGACATATATGTATTAAAACCATTACTAGTACTAAACCATTCATATGTCAACAAACAATGAAGATTTACATAAACCATACAGATATATCTTAATATTCAACCTAAGTCAGGTAATTAAACGAGATTTAAGACCTACCACAACAACTAAATCGTCTAAGCCATACCAAGTATCCTCATTCCTAAAGTCAGGTAAATTTAAGCGCAGTAAGAGCCTACCATCCAGTCCATATCTTAATGCATACGGTTATTGAAGGTGAGGGACAATGATTGTGGGGGTAACACCTAGTGAATTATTCCTGGCATCTGGTTCCTA
R1015G31	Thunnus albacares	ACAACCTCGCACGCCCACGCACGCACACACACGCAACCACACCATACTCATATATCGACCATATATAATAATGCTTTAGGACATATATGTATTAAAACCATTACTAGTACTAAACCATTCATATGTCAACAAACAATGAAGATTTACATAAACCATACAGATACATCTTAATATTCAATCTAAGTCAAGTAATTAGACGAGATTTAAGACCTACCAATAACAACTAAATCGTCTAAGCCATACCAAGTATCCTCATTCCTAAAGTCGGGTAAATTTAAGCGCAGTAAGAGCCTACCATCCAGTCCATATCTTAATGCATACGGTTATTGAAGGTGAGGGACAATGATTGTGGGGGTAACACCTAGTGAATTATTCCTGGCATCTGGTTCCT
R1015G41	Thunnus obesus	GTGCGCACATATTTCATATGTCTGCACACGTACATATATGTAATTACACCATATCTATATATGGACCATATACAGTAATGTTCTAGGACATATATGTATTAAAACCATTACTAGTACTAAACCATTCATATATCAACAAACAATGAAGACTTACATAAACCATACAGATATATTCCAACATTCAAACTAAACCAAGTAATTAAACGAGATTTAAGACCTACCACAAACACTAAATCGTCTAAGCCATACCAAGTCTCCTCATCCCTGAAATCAAGTAAATTTAAGCGCAGTAAGAACCTACCATCCAGTCCATATCTTAATGCATACGGTTATTGAAGGTGAGGGACAATAATTGTGGGGGTAGCACTCAGTGAATTATTCCTGGCATCTGGTTCCTAA…
R1015T21	Thunnus thynnus	TGCGCATGTACATATATGTAATTACACCATATTCATATATAGACCATATATAATAATGTTTTAGGACATATATGTATTAAAACCATTACTAGTACTAAACCATTCATATGTCAATAAATAATGAAGATTTACATAAACCATACAAATAAACCTCAACATTCATTTTGAATTCAGGCGATTGAACGAGATTTAAGACCTAACATAAACCTAAATCGTCTAAGCCATACCAAGTCTCCTCATCTCTGACATCTCGTAAACTTAAGCGCAGTAAGAGCCTACCATCCAGTCCATTTCTTAATGCATACGGTTATTGAAGGTGAGGGACAATGATTGTGGGGGTAACACTTAGTGAATTATTCCTGGCATCTGGTTCCTAATTCAAGAAT
R1015T31	Thunnus obesus	ATGCTCCCCGTGCGCACATATTTCATATGTCTGCGCACGTACATATATGTAATTACACCATACCTATATATGGACCATATACAGTAATGTTCTAGGACATATATGTATTAAAACCATTACTAGTACTAAACCATTCATATATCAACAAACAATGAAGACTTACATAAACCATACGAATATATTCCAATATTCAAATTAAATCAAGTAATTAAACGAGATTTAAGACCTACCACAAACACTAAATCGTCTAAGCCATACCAAGTCCCCTCATTCCTGAAATCAAGTAAATTTAAGCGCAGTAAGAGCCTACCATCCAGTCCATATCTTAATGCATACGGTTATTGAAGGTGAGGGACAATAATTGTGGGGGTAGCACTCAGTGAATTATTCCTGGCATCT…
R1015T41	Thunnus albacares	TCCCTATGCGCACATATTTCATATGTCTACGCATGTACATATATGTAATTACACCATACTCATATATCGACCATATATAATAATGCTTTAGGACATATATGTATTAAAACCATTACTAGTACTAAACCATTCATATGTCAACAAACAATGAAGATTTACATAAACCATACAGATATATCTTAATATTCAATCTAAGTCAAGTAATTAAACGAGATTTAAGACCTACCATAATAACTAAATCGTCTAAGCCATACCAAGTATCCTCATTCCTAAAATCAGGTAAATTTAAGCGCAGTAAGAGCCTACCATCCAGTCCATATCTTAATGCATACGGTTATTGAAGGTGAGGGACAATGATTGTGGGGGTAGCACCTAGTGAATTATTCCTGGCATCTGGTT…
R1114B11	Thunnus albacares	ATATGTAATTACACCATACTTATATATCGACCATATATAATAATGCTTTAGGACATATATGTATTAAAACCATTACTAGTACTAAACCATTCATATGTCAACAAACAATGAAGATTTACATAAACCATACATATATATCTTAACATTTAACCTAAGTCAAGTAATTAAACGAGATTTAAGACCTACCATAACAACTAAATCGTCTAAGCCATACCAAGTATCCTCATCCCTAAAGTCAAGCAAATTTAAGCGCAGTAAGAGCCTACCATCCAGTCCATATCTTAATGCATACGGTTATTGAAGGTGAGGGACAATGATTGTGGGGGTAGCACCTAGTGAATTATTCCTGGCATCTGGTTCCTAATTCAA
R1114B21	Thunnus albacares	ACACGCAACCACACCACACCCACACATCGACACACACAATAACGCCCTAGGACATGCACGCACTAAAACCATCACTAGTACTAAACCATTCATATGTCAACAAACAATGAAGATTTACATAAACCATACAGATATATCTTAATCTTCAATCTAAGTCAGGTAATTAAACGAGATTTAAGACCTACCATAACGACTAAATCGTCTAAGCCATACCAAGTATCCTCATCCCTAAAGTCAGGTAAATTTAAGCGCAGTAAGAGCCTACCATCCAGTCCATATCTTAATGCATACGGTTATTGAAGGTGAGGGACAATGATTGTGGGGGTAACACCTAGTGAATTATTCCTGGCATCTGGTTCCTAATTCAGC
R1114B31	Thunnus thynnus	ATATGTAATTACACCATATTCATATATAGACCATATACAATAATGTTTTAGGACATATATGTATTAAAACCATTACTAGTATTAAACCATTCATATGTCAATAAATAATGAAGATTTACATAAACCATATAAATAAGTCTCAACATTCATCTTGAATTCAGGCGATTAAACGAGATTTAAGACCTAACATAAATCTAAATCGTCTAAGCCATACCAAGTCTCCTCATCTCTAACATCTCGTAAATTTAAGCGCAGTAAGAGCCTACCATCCAGTCCATTTCTTAATGCATACGGTTATTGAAGGTGAGGGACAATAATTGTGGGGGTAACACTTAGTGAACTATTCCTGGCATCTGGTTCCTAATT
R1114B41	Thunnus albacares	ATATGTAATTACACCATACTCATATATCGACCATATATAATAATGCTTTAGGACATATATGTATTAAAACCATTACTAGTACTAAACCATTCATATGTCAACAAACAATGAAGACTTACATAAACCATACAGATATATCTTAATATTCAACCTAAGTCAAGTAATTAAACGAGATTTAAGATCTACCATAACAACTAAATCGTCTAAGCCATACCAAGTATCCCCATTCCTAAAGTCAGGTAAATTTAAGCGCAGTAAGAGCCTACCATCCAGTCCATATCTTAATGCATACGGTTATTGAAGGTGAGGGACAATGATTGTGGGGGTAACACCTAGTGAATTATTCCTGGCATCTGGTTCCTAATT
R1114G11	Thunnus albacares	ACAAGAAACAACACCATACCCATACATCGACCATATACAATAATGCTCTAGGACATATATGCATTAAAACCATTACTAGTACTAAACCATTCATATGTCAACAAACAATGAAGATTTACATAAACCATACATGTATATCTTAATATTTAATCTAAGTCAGGTAATTGAACGAGATTTAAGACCTACCATAACAACTAAATCGTCTAAGCCATACCAAGTATCCTCATTCCTAAAGTCAAGCAAATTTAAGCGCAGTAAGAGCCTACCATCCAGTCCATATCTTAATGCATACGGTTATTGAAGGTGAGGGACAATGATTGTGGGGGTAACACCTAGTGAATTATTCCTGGCATCTGGTTCCTAATTCAA
R1114G21	Thunnus thynnus	CACCATATTCTATATAAACCATATATAATAATGTTTTAGGACATATATGTATTAAAACCATTACTAGTATTAAACCATTCATATGTCAATAAATAATGAAGATTTACATAAACCATACAAGTAAGCCTCAACATTCATCTTGAATTCAAGCGATTAAACGAGATTTAAGACCTAACATAAATCTAAATCGTCTAAGCCATACCAAGTCTCCTCATCTCTGACATCTCGTAAATTTAAGCGCAGTAAGAACCTACCATCCAGTCCATTTCTTAATGCATACGGTTATTGAAGGTGAGGGACAATAATTGTGGGGGTAACACTTAGTGAATTATTCCTGGCATCTGGTTCCTAATTCAAC
R1114G31	Thunnus albacares	ATATGTAATTACACCATACTCATATATCGACCATATATAATAATGCTTTAGGACATATATGTATTAAAACCATTACTAGTACTAAACCATTCATATGTCAACAAATAATGAAGATTTACATAAACCATACAGATATATCTTAACATTCAACCTAAGTCAAGTAATTAGACGAGATTTAAGACCTACCATAATAACTAAATCGTCTAAGCCATACCAAGTATCCCCATTCCTAAAGTCGAGTAAATTTAAGCGCAGTAAGAACCTACCATCCAGTCCATATCTTAATGCATACGGTTATTGAAGGTGAGGGACAATGATTGTGGGGGTAACACCTAGTGAATTATTCCTGGCATCTGGTTCCTAATTCAA
R1114G41	Thunnus albacares	ATATGTAATTACACCATACTCATATATCGACCATATATAATAATGCTTTAGGACATATATGTATTAAAACCATTACTAGTACTAAACCATTCATATATCAACAAACAATGAAGATTTACATAAACCATACAAATATATCTTAACATTCAACCTAAGTCAAGTAATTAGACGAGATTTAAGACCTACCATAACAACTAAATCGTCTAAGCCATACCAAGTATCCTCATTCCTAAAATCAAGTAAATTTAAGCGCAGTAAGAGCCTACCATCCAGTCCATATCTTAATGCATACGGTTATTGAAGGTGAGGGACAATGATTGTGGGGGTAACACCTAGTGAATTATTCCTGGCATCTGGTTCCTAATTCAAC
R1114T11	Thunnus albacares	ATATGTAATTACACCATAATCATATATCGACCATATATAATAATGCTTTAGGACATATATGTATTAAAACCATTACTAGTACTAAACCATTCATATATCAACAAACAATGAAGATTTACATAAACCATACAGATATATATTAACATTCAATCTAAGTCAAGTAATTAAACGAGATTTAAGACCTACCACAATAACTAAATCGTCTAAGCCATACCAAGTACCCCCATCCCTAAAGTCAGGTAAATTTAAGCGCAGTAAGAACCTACCATCCAGTCCATATCTTAATGCATACGGTTATTGAAGGTGAGGGACAATAATTGTGGGGGTAACACCTAGTGAATTATTCCTGGCATCTGGTTCCTAATTCAA
R1114T21	Thunnus albacares	ATATGTAATTACACCATACTCATATATCGACCATATATAATAATGCTTTAGGACATATATGTATTAAAACCATTACTAGTACTAAACCATTCATATGTCAACAAACAATGAAGATTTACATAAACCATACAGATATATCTTAACATTCAACCTAAGTCAAGTAATTAGACGAGATTTAAGACCTACCATAACAACTAAATCGTCTAAGCCATACCAAGTATCCTCATTCCTAAAGTCGAGTAAATTTAAGCGCAGTAAGAGCCTACCATCCAGTCCATATCTTAATGCATACGGTTATTGAAGGTGAGGGACAATGATTGTGGGGGTAACACCTAGTGAATTATTCCTGGCATCTGGTTCCTAATT
R1114T31	Thunnus obesus	ATATGTAATTACACCATACTTATATATTAACCATATATAATAATGTTCTAGGACATATATGTATTAAAACCATTACTAGTACTAAACCATTCATATATCAACAAACAATGAAGGTTTACATAAACCATACAGATATATCTCAACATCCATCCTAAGTCAAGTAATTAAACGAAACTTAAGACCTACCACAAACACTAAATCGTCTAAGCCAAACCAAGTCCCATCATCTCTAAAATCAAGTAAATTTAAGCGCAGTAAGAGCCTACCATCCAGTCCATATCTTAATGCATACGGTTATTGAAGGTGAGGGACAATAATTGTGGGGGTAACACTCAGTGAACTATTCCTGGCATCTGGTTCCTAATTCAA
R1114T41	Thunnus albacares	ATATGTAATTACACCATATTCATATATCGACCATATATAATAATGCTTTAGGACATATATGTATTAAAACCATTACTAGTACTAAACCATTCATATGTCAACAAACAATGAAGATTTACATAAACCATACAGATATATCTTAATATTCAATCTAAGTCAAGTAATTAAACGAGATTTAAGACCTACCATAACACCTAAATCGTCTAAGCCACACCAAGTATCCCCATTCCTAAAGTCAGGTAAATTTAAGCGCAGTAAGAGCCTACCATCCAGTCCATATCTTAATGCATACGGTTATTGAAGGTGAGGGACAATGATTGTGGGGGTAACACCTAGTGAATTATTCCTGGCATCTGGTTCCTAATT
R1214B11	Thunnus albacares	ATATGTAATTACACCATACTCATATATCGACCATATATAATAATGCTTTAGGACATATATGTATTAAAACCATTACTAGTACTAAACCATTCATATGTCAACAAACAATGAAGATTTACATAAACCATACAGATATACCTCAATATTCGATCTAAGTCAAGTAATTAGACGAGATTTAAGACCTACCATAATAACTAAATCGTCTAAGCCATACCAAGTATCCTCATTCCTAAAGTCAGGTAAATTTAAGCGCAGTAAGAGCCTACCATCCAGTCCATATCTTAATGCATACGGTTATTGAAGGTGAGGGACAATGATTGTGGGGGTAACACCTAGTGAATTATTCCTGGCATCTGGTTCCTAA
R1214B21	Thunnus thynnus	ATATGTAATTACACCATATTCATATATAGACCATATATAATAATGTTTTAGGACATATATGTATTAAAACCATTACTAGTATTAAACCATTCATATGTCAATAAATAATGAAGATTTACATAAACCATACAAATAAACCTCAGCATTCGTGTTGAATTCAGGCGATTAAACGAGATTTAAGACCTAACATAAATCTAAATCGTCTAAGCCATACCAAGTCTCCTCATCTCTGACATCTCGTAAACTTAAGCGCAGTAAGAGCCTACCATCCAGTCCATTTCTTAATGCATACGGTTATTGAAGGTGAGGGACAATAATTGTGGGGGTAACACTTAGTGAATTATTCCTGGCATCTGGTTCCTAATT
R1214B31	Thunnus albacares	ATATGTAATTACACCATACCCATATATCGACCATATATAATAATGCTTTAGGACATACATGTATTAAAACCATTGCTAGTACTAAACCATTCATATGTCAACAAACAATGAAGATTTACATAAACCATACAGATATATCTTAATATTCAATCTAAGTCAAGTAATTAAACGAGATTTAAGACCTACCATAACAACTAAATCGTCTAAGCCATACCAAGTATCCCCATTCCTAAAGTCAGGTAAATTTAAGCGCAGTAAGAGCCTACCATCCAGTCCATATCTTAATGCATACGGTTATTGAAGGTGAGGGACAATGATTGTGGGGGTAACACCTAGTGAATTATTCCTGGCATCTGGTTCCTAATTCA
R1214B41	Thunnus albacares	TATAATAATGCTTTAGGACATATATGTATTAAAACCATTACTAGTACTAAACCATTCATATGTCAACAAACAATGAAGATTTACATAAACCATACAGATATATCTTAATATTCAATCTAAGTCAAGTAATTAAACGAGATTTAAGACCTACCATAACAACTAAATCGTCTAAGCCATACCAAGTATCCTCATCCCTAAAGTCAGGTAAATTTAAGCGCAGTAAGAGCCTACCATCCAGTCCATATCTTAATGCATACGGTTATTGAAGGTGAGGGACAATGATTGTGGGGGTAACACCTAGTGAATTATTCCTGGCATCTGGTTCCTAATTCTTC
R1214B42	Thunnus albacares	TAATAATGCTTTAGGACATATATGTATTAAAACCATTACTAGTACTAAACCATTCATATATCAACAAACAATGAAGATTTACATAAACCATACAGATATATCTTAACATTCAATCTAAGTCAAGTAATTAAACGAGATTTAAGACCTACCATAATAACTAAATCGTCTAAGCCATACCAAGTACCCCCATCCCTAAAGTCAGGTAAATTTAAGCGCAGTAAGAACCTACCATCCAGTCCATATCTTAATGCATACGGTTATTGAAGGTGAGGGACAATGATTGTGGGGGTAACACCTAGTGAATTATTCCTGGCATCTGGTTCCTAATTCATA
R1214G11	Thunnus obesus	AATAATGTTCTAGGACATATATGTATTAAAACCATTACTAGTACTAAACCATTCATATATCAACAAACAATGAAGATTTACATAAACCATACAAGTATATTCCAACATTCAAGTTAAGTCAAGTAATTAAACGAGATTTAAGACCTACCACAAACACTAAATCGTCTAAGCCATACCAAGTCCCCACATTCCTGAAATAAGTAAATTTAAGCGCAGTAAGAGCCTACCATCCAGTCCATATCTTAATGCATACGGTTATTGAAGGTGAGGGACAATAATTGTGGGGGTCGCACTTAGTGAATTATTCCTGGCATCTGGTTCCTAATTCATC
R1214G21	Thunnus thynnus	ATATGTAATTACACCATATTCATATATAGACCATATATAATAATGTTTTAGGACATATATGTATTAAAACCATTACTAGTATTAAACCATTCATATGTCAATAAATAATGAAGATTTACATAAACCATACAAGTAAGCCTCAACATTCATCTTGAATTCAAGCGATTAAACGAGATTTAAGACCTAACATAAATCTAAATCGTCTAAGCCATACCAAGTCTCCTCATCTCTGACATCTCGTAAACTTAAGCGCAGTAAGAACCTACCATCCAGTCCATTTCTTAATGCATACGGTTATTGAAGGTGAGGGACAATAATTGTGGGGGTAACACTTAGTGAATTATTCCTGGCATCTGGTTCCTAATTCAA
R1214G31	Thunnus albacares	ACACACGCACTAAAACCATCACTAGTACCAAACCATTCATATGTCAACAAACAATGAAGATTTACATAAACCATACAGATATATCTTAATATTCAACCTAAGTCAAGTAACTAAACGAGATTTAAGACCTACCATAATAACTAAATCGTCTAAGCCATACCAAGTACCCTCATCCCTAAAGTCAGGTAAATTTAAGCGCAGTAAGAGCCTACCATCCAGTCCATATCTTAATGCATACGGTTATTGAAGGTGAGGGACAATGATTGTGAGGGTAACACCTAGTGAATTATTCCTGGCATCTGGTTCCTAATTCAAC
R1214G41	Thunnus obesus	ATATGTAATTACACCATATTTATATATGGACCATATACAATAATGTTCTAGGACATATATGTATTAAAACCATTACTAGTATTAAACCATTCATATGTCAACAAACAATGAAGATTTACATAAACCATACAAGTATGTTCCAACATTCAATTTAAGTCAAGTAATTAAACGAGATTTAAGACCTACCACAAACACTAAATCGTCTAAGCCATACCAAGTCCCCACATCCCTGAAATAAGTAAATCTAAGCGCAGTAAGAGCCTACCATCCAGTCCATATCTTAATGCATACGGTTATTGAAGGTGAGGGACAATAATTGTGGGGGTCGCACTTAGTGAATTATTCCTGGCATCTGGTTCCTAATTCAAA
R1214G42	Thunnus albacares	ATATGTAATTACACCATACTCATATATCGACCATATATAATAATGCTTTAGGACATATATGTATTAAAACCATCACTAGTACTAAACCATTCATATGTCAACAAACAATGAAGATTTACATAAACCATACATATATATCTTAACATTTAACCTAAGTCAAGTAATTAAACGAGATTTAAGACCTACCATAACAACTAAATCGTCTAAGCCATACCAAGTATCCTCATCCCTAAAGTCAAGCAAATTTAAGCGCAGTAAGAGCCTACCATCCAGTCCATATCTTAATGCATACGGTTATTGAAGGTGAGGGACAATAATTGTGGGGGTAGCACCTAGTGAATTATTCCTGGCATCTGGTTCCTAATTCAA
R1214T21	Thunnus thynnus	ATATGTAATTACACCATATTCATATATAGACCATATATAATAATGTTTTAGGACATATATGTATTAAAACCATTACTAGTATTAAACCATTCATATGTCAATAAATAATGAAGATTTACATAAACCATACAAGTAAGCCTCAACATTCATCTTGAATTCAAGCGATTAAACGAGATTTAAGACCTAACATAAATCTAAATCGTCTAAGCCATACCAAGTCTCCTCATCTCTGACATCTCGTAAACTTAAGCGCAGTAAGAACCTACCATCCAGTCCATTTCTTAATGCATACGGTTATTGAAGGTGAGGGACAATAATTGTGGGGGTAACACTTAGTGAATTATTCCTGGCATCTGGTTCCTAATTCACG
R1214T31	Thunnus albacares	ATATGTAATTACACCATACTCATATATTGACCATATACAATAATGCTTTAGGACATATATGTATTAAAACCATTACTAGTACTAAACCATTCATATGTCAACAAACAATGAAGATTTACATAAACCATATATATATATCTTAATATTCAATCTAAGTCAAGTAATTAAACGAGATTTAAGATCTACCATAACAACTAAATCGTCTAAGCCATACCAAGTATCCTCATTCCTAAAATCAGGTAAACTTAAGCGCAGTAAGAGCCTACCATCCAGTCCATATCTTAATGCATACGGTTATTGAAGGTGAGGGACAATGATTGTGGGGGTAACACCTAGTGAATTATTCCTGGCATCTGGTTCCTAATTCAA
R1214T41	Thunnus albacares	TATATAATAATGCTTTAGGACATATATGTATTAAAACCATTACTAGTACTAAACCATTCATATGTCAACAAACAATGAAGATTTACATAAACCATACAGATATATCTTAATATTCAATCTAAGTCAGGTAATTAAACGAGATTTAAGACCTACCACAACAGCTAAATCGTCTAAGCCATACCAAGTATCCTCATTCCTAAAGTCAAGTAAATTTAAGCGCAGTAAGAGCCTACCATCCAGTCCATACCTTAATGCATACGGTTATTGAAGGTGAGGGACAATGATTGTGGGGGTAACACCTAGTGAATTATTCCTGGCATCTGGTTCCTAATTCAAT
R1214T42	Thunnus albacares	ATATGTAATTACACCATACTCATATATCGACCATATATAATAATGCTTTAGGACATATATGTATTAAAACCATTACTAGTACTAAACCATTCATATATCAACAAACAATGAAGATTTACATAAACCATACAGATATATCTTAACATTCAACCTAAGTCAAGTAATTAGACGAGATTTAAGACCTACCATAACAACTAAATCGTCTAAGCCATACCAAGTATCCTCATTCCTAAAGTCAAGTAAATTTAAGCGCAGTAAGAGCCTACCATCCAGTCCATATCTTAATGCATACGGTTATTGAAGGTGAGGGACAATGATTGTGGGGGTAACACCTAGTGAATTATTCCTGGCATCTGGTTCCTAATTCAA

## Sheet: pescaderias
Sample Code	Result	Seqs
G0315BCI	Thunnus albacares	GGTTTCTAATTAACTTTCTTTGTTCCCTATGCGCACATATTTCATATGTCTACGCATGTACATATATGTAATTACACCATACTCATATATCGACCATATATAATAATGCTTTAGGACATATATGTATTAAAACCATTACTAGTACTAAACCATTCATATGTCAACAAACAATGAAGATTTACATAAACCATACAGATATATCTTAATATTCAATCTAAGTCAAGTAATTAAACGAGATTTAAGACCTACCATAACAACTAAATCGTCTAAGCCATACCAAGTATCCTCATTCCTAAGGTCAGGTAAATTTAAGCGCAGTAAGAGCCTACCATCCAGTCCATATCTTAATGCATACGGTTATTGAAGGTGAGGGACAATGATTGTGGGGGTAACACCTAG…
G0315BCR	Thunnus albacares	CGCATCAAATTAACTTTCTTTGTTCCCTATGCGCACATATTTCATATGTCTACGCATGTACATATATGTAATCACACCATACTTATATATCGACCATATGTAATAATGCTTTAGGACATATATGTATTATAACCATTACTAGTATTAAACCATTCATATGTCAACAAACAATGAAGACTTACATAAACCATACAAATATATCTTAATATTCAACCTAAGTCAAGTAATTAAACGAGATTTAAGACCTACCATAACAACTAAATCGTCCAAGCCATACCAAGTATCCCCATCCCTAAAGTCAAGTAAATTTAAGCGCAGTAAGAGCCTACCATCCAGTCCATATCTTAATGCATACGGTTATTGAAGGTGAGGGACAATGATTGTGGGGGTAACACCTAG…
G0315GCI	Thunnus albacares	ATGCGCACATATTTCATATGTCTACGCATGTACATATATGTAATTACACCATACTCATATATCGACCATATATAATAATGCTTTAGGACATATATGTATTAAAACCATTACTAGTACTAAACCATTCATATGTCAACAAACAATGAAGATTTACATAAACCATACAGATATATCTTAATATTCAATATAAGTCGAGTAATTAAACGAGATTTAAGACCTACCATAACAACTAAATCGTCTAAGCCATACCAAGTATCCTCATTCCTAAAATCAGGTAAATTTAAGCGCAGTAAGAGCCTACCATCCAGTCCATATCTTAATGCATACGGTTATTGAAGGTGAGGGACAATGATTGTGGGGGTAACACCTAGTGAATTATTCCTGGCATCTGGTTCCTAA…
G0315GCR	Thunnus albacares	GGTTCTATTAACATTCTTTGTTCCCTATGCGCACATATTTCATATGTCTACGCATGTACATATATGTAATTACACCATACTCATATATCGACCATATATAATAATGCTTTAGGACATATATGTATTAAAACCATTACTAGTACTAAACCATTCATATGTCAACAAACAATGAAGATTTACATAAACCATACAAATATATCTTAATATTCAACCTAAGTCAAGTAATTAGACGAGATTTAAGACCTACCATAACAACTAAATCGTCTAAGCCATACCAAGTATCCCCATCCCTAAAGTCAAGTAAATTTAAGCGCAGTAAGAGCCTACCATCCAGTCCATATCTTAATGCATACGGTTATTGAAGGTGAGGGACAATGATTGTGGGGGTAACACCTAGTG…
G0315TCI	Thunnus albacares	AGTATCTATAGAACTCTATTTTTGTTCCCTATGCGCACATATTTCATATGTCTACGCATGTACATATATGTAATTACACCATACTCATATATCGACCATATATAATAATGCTTTAGGACATATATGTATTAAAACCATTACTAGTACTAAACCATTCATATGTCAACAAACAATGAAGATTTACATAAACCATACAGATATGTCTTAACATTCAACCTAAGTCAAGTAATTAGACGAGATTTAAGACCTACCATAACAACTAAATCGTCTAAGCCATACCAAGTATCCCCATTCCTAAAGTCGAGTAAATTTAAGCGCAGTAAGAACCTACCATCCAGTCCATATCTTAATGCATACGGTTATTGAAGGTGAGGGACAATGATTGTGGGGGTAACACCT…
G0315TCR	Thunnus albacares	ATGCGCACATATTTCATATGTCTACGCATGTACATATATGTAATTACACCATACTCATATATCGACCATATATAATAATGCTTTAGGACATATATGTATTAAAACCATTACTAGTACTAAACCATTCATATGTCAACAAACAATGAAGACTTACATAAACCATACAGATATATCTTAATATTCAGTCTAAGTCAAGTAATTAAACGAGATTTAAGACCTACCATAATAACTAAATCGTCTAAGCCATACCAAGTATCCCCATTCCTAAAGTCAGGTAAATTTAAGCGCAGTAAGAGCCTACCATCCAGTCCATATCTTAATGCATACGGTTATTGAAGGTGAGGGACAATGATTGTGGGGGTAACACCTAGTGAATTATTTCTGGCATCTGGTTC
G0615BCR	Thunnus albacares	TGTCTACGCATGTACATATATGTAATTACACCATACTCATATATCGACCATATATAATAATGCTTTAGGACATATATGTATTAAAACCATTACTAGTACTAAACCATTCATATGTCAACAAACAATGAAGATTTACATAAACCATACAGATATATCTTAATATTCAACCTAAGTCAAGTAATTAAACGAGATTTAAGACCTACCATAACAACTAAATCGTCTAAGCCATACCAAGTATCCCCATTCCTAAAGTCAAGTAAATTTAAGCGCAGTAAGAGCCTACCATCCAGTCCATATCTTAATGCATACGGTTATTGAAGGTGAGGGACAATGATTGTGGGGGTAACACCTAGTGAATTATTCCTGGCAT
G0615GCI	Thunnus obesus	ATGTCTACGCACGTACATATATGTAATTACACCATACTTATATATTAACCATATATAATAATGTTCTAGGACATATATGTATTAAAACCATTACTAGTATTAAACCATTCATATGTCAACAAACAATGAAGGTTTACATAAACCATACAGACATATCTCAACATCCATACTAAGTCAAGTAATTAAACGAGACTTAAGACCTACCACAAACACTAAATCGTCTAAGCCAAACCAAGTCTCAACATCTCTAAAATCAAGTAAATTTAAGCGCAGTAAGAGCCTACCATCCAGTCCATATCTTAATGCATACGGTTATTGAAGGTGAGGGACAATAATTGTGGGGGTAACACTTAGTGAATTATTCCTGGCATCTGGTTCCTAATTCAAA
G0615GCR	Thunnus albacares	TGTCTACGCATGTACATATATGTAATTACACCATACTCATATATCGACCATATATAATAATGCTTTAGGACATATATGTATTAAAACCATTACTAGTACTAAACCATTCATATGTCAACAAACAATGAAGATTTACATAAACCATACATGTATATCCTAATATTTAATCTAAGTCAGGTAATTAAACGAGATTTAAGACCTACCATAACAACTAAATCGCCTAAGCCATACCAAGTATCCTCATTCCTAAAGTCAAGCAAATTTAAGCGCAGTAAGAGCCTACCATCCAGTCCATATCTTAATGCATACGGTTATTGAAGGTGAGGGACAATAATTGTGGGGGTAACACCTAGTGAATTATTCCTGGCAT
G0615TCI	Thunnus thynnus	TCTGCGCATGTACATATATGTAATTACACCATATTCATATATAGACCATATATAATAATGTTTTAGGACATATATGTATTAAAACCATTACTAGTATTAAACCATTCATATGTCAATAAATAATGAAGATTTACATAAACCATACAAATAAACCTCAACATTCATCTTGAATTCAGGTGATTAAACGAGATTTAAGACCTAACATAAATCTAAATCGTCTAAGCCATACCAAGTCTCCTCATCTCTGACATCTCGTAAACTTAAGCGCAGTAAGAACCTACCATCCAGTCCATTTCTTAATGCATACGGTTATTGAAGGTGAGGGACAATAATTGTGGGGGTAACACTTAGTGAATTATTCCTGGCATCT
G0615TCR	Thunnus albacares	ATGTCTACGCATGTACATATATGTAATTACACCATACTCATATATCGACCATATATAATAATGCTTTAGGACATATATGTATTAAAACCATTACTAGTACTAAACCATTCATATGTCAACAAACAATGAAGATTTACATAAACCATACAGATATATCTTAACATTCAACCTAAGTCAAGTAATTAGACGAGATTTAAGACCTACCATAACAACTAAATCGTCTAAGCCATACCAAGTATCCCCATTCCTAAAGTCGAGTAAATTTAAGCGCAGTAAGAGCCTACCATCCAGTCCATATCTTAATGCATACGGTTATTGAAGGTGAGGGACAATGATTGTGGGGGTAACACCTAGTGAATTATTCCTGGCA
G0915GCI	Thunnus obesus	ACTAGTATTAAACCATTCATATATCAACAAACAACGAAGGTTTACATAAACCATACAGGTATATCTCAACATCCATACTAAGTCAAGTAATTAAACGAAACTTAAGACCTACCACAAACACTAAATCGTCTAAGCCAAACCAAGTCCCACCATCTCTAAAATCAAGTAAATTTAAGCGCAGTAAGAGCCTACCATCCAGTCCATATCTTAATGCATACGGTTATTGAAGGTGAGGGACAATAATTGTGGGGGTAACACTTAGTGAATTATTCCTGGCATCTGGTTCCAAT
G0915GCR	Thunnus obesus	TGTCTACGCACGTACATATATGTAATTACACCATACTTATATATTAACCATATACAATAATGTTCTAGGACATATATGTATTAAAACCATTACTAGTATTAAACCATTCATATATCAACAAACAATGAAGGTTTACATAAACCATACAGACATATCCCAACATCCATGCTAAGTCAAGTAACTAAACGAAACTTAAGACCTACCACAAACACTAAATCGTCTAAGCCAAACCAAGTCCCATCATCTCTAAAATCAAGTAAATTTAAGCGCAGTAAGAGCCTACCATCCAGTCCATATCTTAATGCATACGGTTATTGAAGGTGAGGGACAATAATTGTGGGGGTAACACTTAGTGAATTATTCCTGGCATCTGGTTCCTAATTCAAAAA
G0915TCI	Thunnus albacares	ATGCGCACATATTTGAATATGTCTACGCATGTACATATATGTAATTACACCATACTCATATATCGACCATATATAATAATGCTTTAGGACATATATGTATTAAAACCATTACTAGTACTAAACCATTCATATGTCAACAAACAATGAAGATTTACATAAACCATACAGATATATCTTAATACTCAACCTAAGTCAAGTAATTAAACGAGATTTAAGATCTACCATAACAACTAAATCGTCTAAGCCATACCAAGTATCCCCATTCCTAAAGTCAGGTAAATTTAAGCGCAGTAAGAGCCTACCATCCAGTCCATATCTTAATGCATACGGTTATTGAAGGTGAGGGACAATGATTGTGGGGGTAACACCTAGTGAATTATTCCTGGCATCTGGTTCCTA…
G0915TCR	Thunnus obesus	ATTTAATATGTCTACGCACGTACATATATGTAATTACACCATATTCATATATAGACCATATACAATAATGTTCTAGGACATATATGTATTAAAACCATTACTAGTACTAAACCATTCATATGTCAACAAATAATGAAGACTTACATAAACCATACGAATATATTCCAACATTCAAATTAAGTCAAGTAATTAGACGAGATTTAAGACCTACCACAGATACTAAATCGTCTAAGCCATACCAAGTTCCCCCATCTCTGAAATCAAGTAAATTTAAGCGCAGTAAGAGCCTACCATCCAGTCCATATCTTAATGCATACGGTTATTGAAGGTGAGGGACAATAATTGTGGGGGTAACACCCAGTGAATTAT
G1114BCI	Thunnus albacares	ATATGTAATTACACCATACCCATATATCAACCATATATAATAATGCTTTAGGACATATATGTATTAAAACCATTACTAGTACTAAACCATTCATATGTCAACAAACAATGAAGATTTACATAAACCATACAGATATATCTTAATATTCAATCTAAGTCAGGTAATTAAACGAGATTTAAGACCTACCATAACAACTAAATCGTCTAAGCCATACCAAGTATCCCCATTCCTAAAGTCGGGTAAATTTAAGCGCAGTAAGAGCCTACCATCCAGTCCATATCTTAATGCATACGGTTATTGAAGGTGAGGGACAATAATTGTGGGGGTAACACCTAGTGAATTATTCCTGGCATCTGGTTCCTAATT
G1214BCI	Thunnus albacares	ATATGTAATTACACCATACTCATATATCGACCATATATAATAATGCTTTAGGACATATATGTATTAAAACCATTACTAGTACTAAACCATTCATATATCAACAAATAATGAAGATTTACATAAACCATACAGATATATCTTAACATTCAATCTAAGTCAAGTAATTAAACGAGATTTAAGACCTACCATAATAACTAAATCGTCTAAGCCATACCAAGTATCCCCATTCCTAAAGTCAGGTAAATTTAAGCGCAGTAAGAGCCTACCATCCAGTCCATATCTTAATGCATACGGTTATTGAAGGTGAGGGACAATGATTGTGGGGGTAACACCTAGTGAACTATTCCTGGCATCTGGTTCCTAATT
G1214BCP	Thunnus albacares	ATATGTAATTACACCATACTCATATATCGACCATATATAATAATGCTTTAGGACATATATGTATTAAAACCATTACTAGTACTAAACCATTCATATGTCAACAAACAATGAAGATTTACATAAACCATACAGATATATCTTAACATTCAACCTAAGTCAAGTAATTAAACGAGATTTAAGACCTACCACAATAACTAAATCGTCTAAGCCATACCAAGTATCCCCATTCCTAAAGTCAGGTAAATTTAAGCGCAGTAAGAGCCTACCATCCAGTCCATATCTTAATGCATACGGTTATTGAAGGTGAGGGACAATGATTGTGGGGGTAACACCTAGTGAATTATTCCTGGCATCTGGTTCCTAATT
G1214BCR	Thunnus albacares	ATATGTAATTACACCATACTCATATATCGACCATATATAATAATGCTTTAGGACATATATGTATTAAAACCATTACTAGTACTAAACCATTCATATGTCAACAAACAATGAAGATTTACATAAACCATACAGATATATCTTAATATTCAATCTAAGTCAAGTAATTAAACGAGATTTAAGACCTACCATAAACAACTAAATCGTCTAAGCCATACCAAGTATCCTCATTCCTAAAATCAGGTAAATTTAAGCGCAGTAAGAACCTACCATCCAGTCCATATCTTAATGCATACGGTTATTGAAGGTGAGGGACAATGATTGTGGGGGTAACACCTAGTGAATTATTCCTGGCATCTGGTTCCTAATT
G1214BME	Thunnus albacares	ATATGTAATTACACCATACTCATATATCGACCATATATAATAATGCTTTAAGACATATATGTATTAAAACCATTACTAGTACTAAACCATTCATATGTCAACAAACAATGAAGATTTACATAAACCATACATATATATCTTAATATTTAATCTAAGTCAAGTAATTAAACGAGATTTAAGACCTACCATAACAACTAAATCGTCTAAGCCATACCAAGTATCCTCATTCCTAAAGTCAAGCAAATTTAAGCGCAGTAAGAGCCTACCATCCAGTCCATATCTTAATGCATACGGTTATTGAAGGTGAGGGACAATGATTGTGGGGGTAACACCTAGTGAATTATTCCTGGCATCTGGTTCCTAATTCAA
G1214GCI	Thunnus albacares	ATATGTAATTACACCATACTCATATATCGACCATATATAATAATGCTTTAGGACATATATGTATTAAAACCATTACTAGTACTAAACCATTCATATGTCAACAAACAATGAAGATTTACATAAACCATACATATATATCTTAACATTTAATCTAAGTCAAGTAATTAAACGAGATTTAAGACCTACCATAACAACTAAATCGTCTAAGCCATACCAAGTATCCTCATCCCTAAAGTCAAGCAAATTTAAGCGCAGTAAGAACCTACCATCCAGTCCATATCTTAATGCATACGGTTATTGAAGGTGAGGGACAATGATTGTGAGGGTAGCACCTAGTGAATTATTCCTGGCATCTGGTTCCTAATTCAA
G1214GCR	Thunnus obesus	ATATGTAATTACACCATATCTATATATGAACCATATACAATAATGTTCTAGGACATATATGTATTAAAACCATTACTAGTACTAAACCATTCATATATCAACAAACAATGAAGACTCACATAAACCATACGAATATATTCCAACATTCAAGTTAAATCAAGTAATTAAACGAGATTTAAGACCTACCACAAACACTAAATCGTCTAAGCCATACCAAGTCTCCTCATTCCTGAAATCAAGTAAATTTAAGCGCAGTAAGAGCCTACCATCCAGTCCATATCTTAATGCATACGGTTATTGAAGGTGAGGGACAATAATTGTGGGGGTAGCACTCAGTGAATTATTCCTGGCATCTGGTTCCTAATTCA
G1214TCI	Thunnus albacares	ATATGTAATTACACCATACTCATATATCGACCATATATAATAATGCTTTAAGACATATATGTATTAAAACCATTACTAGTACTAAACCATTCATATGTCAACAAACAATGAAGATTTACATAAACCATACATATATATCTTAATATTTAATCTAAGTCAAGTAATTAAACGAGATTTAAGACCTACCATAACAACTAAATCGTCTAAGCCATACCAAGTATCCTCATTCCTAAAGTCAAGCAAATTTAAGCGCAGTAAGAGCCTACCATCCAGTCCATATCTTAATGCATACGGTTATTGAAGGTGAGGGACAATGATTGTGGGGGTAACACCTAGTGAATTATTCCTGGCATCTGGTTCCTAATT
M0115BC1	Thunnus thynnus	ATATGTAATTACACCATATTCATATATAGACCATATATAATAATGTTTTAGGACATATATGTATTAAAACCATTACTAGTATTAAACCATTCATATGTCAATAAATAATGAAGATTTACATAAACCATACAAATAAGCCTCAACATTCATCTTGAATTCAGGCGATTAAACGAGATTTAAGACCTAACATAAATCTAAATCGTCTAAGCCACACCAAGTCTCCTCATCTCTGACATCTCGTAAACTTAAGCGCAGTAAGAGCCTACCATCCAGTCCATTTCTTAATGCATACGGTTATTGAAGGTGAGGGACAATAATTGTGGGGGTAACACTTAGTGAATTATTCCTGGCATCTGGTTCCTAATTCAA
M0115BC2	Thunnus thynnus	ATATGTAATTACACCATATTCATATATAGACCATATACAATAATGTTTTAGGACATATATGTATTAAAACCATTACTAGTATTAAACCATTCATATGTCAATAAATAATGAAGATTTACATAAACCATATAAATAAGTCTCAACATTCATCTTGAATTCAGGCGATTAAACGAGATTTAAGACCTAACATAAATCTAAATCGTCTAAGCCATACCAAGTCTCCTCATCTCTAACATCTCGTAAATTTAAGCGCAGTAAGAGCCTACCATCCAGTCCATTTCTTAATGCATACGGTTATTGAAGGTGAGGGACAATAATTGTGGGGGTAACACTTAGTGAACTATTCCTGGCATCTGGTTCCTAATT
M0115BC3	Thunnus thynnus	ATATGTAATTACACCATATTCATATATAGACCATATATAATAATGTTTTAGGACATATATGTATTAAAACCATTACTAGTATTAAACCATTCATATGTCAATAAATAATGAAGATTTACATAAACCATACAAGTAAGCCTCAACATTCATCTTGAATTCAAGCGATTAAACGAGATTTAAGACCTAACATAAATCTAAATCGTCTAAGCCATACCAAGTCTCCTCATCTCTGACATCTCGTAAACTTAAGCGCAGTAAGAACCTACCATCCAGTCCATTTCTTAATGCATACGGTTATTGAAGGTGAGGGACAATAATTGTGGGGGTAACACTTAGTGAATTATTCCTGGCATCTGGTTCCTAATTCAAC
M0115BC4	Thunnus albacares	ATATGTAATTACACCATACTCATATATCGACCATATATAATAATGCTTTAGGACATATATGTATTAAAACCATTACTAGTACTAAACCATTCATATGTCAACAAACAATGAAGATTTACATAAACCATACATGTATATCTTAATATTTAATCTAAGTCAGGTAATTAAACGAGATTTAAGACCTACCATAACAACTAAATCGTCTAAGCCATACCAAGTATCCTCATTCCTAAAGTCAAGCAAATTTAAGCGCAGTAAGAGCCTACCATCCAGTCCATATCTTAATGCATACGGTTATTGAAGGTGAGGGACAATGATTGTGGGGGTAACACCTGGTGAATTATTCCTGGCATCTGGTTCCTAATTCAAC
M0115MD1	Thunnus albacares	ATATGTAATTACACCATACTCATATATGGACCATATATAATAATGCTTTAGGACATACATGTATTAAAACCATTACTAGTACTAAACCATTCATATATCAACAAATAATGAAGATTTACATAAACCATACAGGTATATCTTAATATTCAATCTAAGTCAAGTAATTAAACGAGATTTAAGACCTACCATAACAACTAAATCGTCTAAGCCATACCAAGTATCCCCATTCCTAAAGTCAGGTAAATTTAAGCGCAGTAAGAGCCTACCATCCAGTCCATATCTTAATGCATACGGTTATTGAAGGTGAGGGACAATGATTGTGGGGGTAACACCTAGTGAATTATTCCTGGCATCTGGTTCCTAATTCA
M0115MD2	Thunnus thynnus	ATATGTAATTACACCATATTCATATATAGACCATATATAATAATGTTTTAGGACATATATGTATTAAAACCATTACTAGTATTAAACCATTCATATGTCAATAAATAATGAAGATTTACATAAACCATACAAGTAAATCTCAACATTCATCCTGAATTCAGGCGATTAGACGAGATTTAAGACCTAACACAAATCTAAATCGTCTAAGCCATACCAAGTCTCCTCATCTCTGACATCCCGTAAACTTAAGCGCAGTAAGAACCTACCATCCAGTCCATTTCTTAATGCATACGGTTATTGAAGGTGAGGGACAATAATTGTGGGGGTAACACTTGGTGAATTATTCCTGGCATCTGGTTCCTAATTCAA
M0115MD3	Thunnus thynnus	ATATGTAATTACACCATATTCATATATAGACCATATATAATAATGTTTTAGGACATACATGTATTAAAACCATTACTAGTATTAAACCATTCATATGCCAATAAATAATGAAGATTTACATAAACCATACAAATAAACCTCAACATTCATCTTGAATTCAAGCGATTAAACGAGATTTAAGACCTAACATAAATCTAAATCGTCTAAGCCACACCAAGTCTCCTCATCTCTGACATCTCGTAAACTTAAGCGCAGTAAGAGCCTACCATCCAGTCCATTTCTTAATGCATACGGTTATTGAAGGTGAGGGACAATAATTGTGGGGGTAACACTTAGTGAATTATTCCTGGCATCTGGTTCCTAATTCAA
M0115MD4	Thunnus thynnus	ATAAATAATGAAGATTTACATAAACCATATAAATAAGTCTCAACATTCATCTTGAATTCAGGCGATTAAACGAGATTTAAGACCTAACATAAATCTAAATCGTCTAAGCCATACCAAGTCTCCTCATCTCTAACATCTCGTAAATTTAAGCGCAGTAAGAGCCTACCATCCAGTCCATTTCTTAATGCATACGGTTATTGAAGGTGAGGGACAATAATTGTGGGGGTAACACTTAGTGAACTATTCCTGGCATCTGGTT
M0115ML1	Thunnus albacares	ATATGTAATTACACCATACTCATATATCGACCATATATAATAATGCTTTAGGACATATATGTATTAAAACCATTACTAGTACTAAACCATTCATATGTCAACAAACAATGAAGATTTACATAAACCATACAGATATATCTTAACATTCAACCTAAGTCAAGTAATTAGACGAGATTTAAGACCTACCATAACAACTAAATCGTCTAAGCCATACCAAGTATCCCCATTCCTAAAGTCGAGTAAATTTAAGCGCAGTAAGAACCTACCATCCAGTCCATATCTTAATGCATACGGTTATTGAAGGTGAGGGACAATGATTGTGGGGGTAACACCTAGTGAATTATTCCTGGCATCTGGTTCCTAATT
M0115ML2	Thunnus obesus	ATATGTAATTACACCATACTTATATATGGACCATATACAATAATGTTCTAGGACATATATGTATTAAAACCATTACTAGTACTAAACCATTCATATGTCAACAAACAATGAAGACTTACATAAACCATACGGATATATTCCAACACTCAAATTAAGTCAGGTAATTAAACGAGATTTAAGACCTACCACAAATACTAAATCGTCTAAGCCATACCAAGTCCCCTCATTCCTGAAATCAAGTAAATTTAAGCGCAGTAAGAGCCTACCATCCAGTCCATATCTTAATGCATACGGTTATTGAAGGTGAGGGACAATAATTGTGGGGGTAGCACTTAGTGAATTATTCCTGGCATCTGGTTCCTAATTCAA
M0115ML3	Thunnus obesus	ATATGTAATTACACCATACTCATATATTAACCATATACAATAATGTTCTAGGACATATATGTATTAAAACCATTACTAGTATTAAACCATTCATATATCAACAAACAATGAAGGTTTACATAAACCATACAGACATATCTCAACATCCATACTAAGTCAAGTAATTAAACGAAATTTAAGACCTACCACAAACATTAAATCGTCTAAGCCAAACCAAGTCTCATCATCTCTAAAATCAAGTAAATTTAAGCGCAGTAAGAGCCTACCATCCAGTCCATATCTTAATGCATACGGTTATTGAAGGTGAGGGACAATAATTGTGGGGGTAACACTTAGTGAATTATTCCTGGCATCTGGTTCCTAATT
M0115ML4	Thunnus obesus	ATATGTAATTACACCATACTTATATATGGACCATATACAATAATGTTCTAGGACATATATGTATTAAAACCATTACTAGTATTAAACCATTCATATGTCAACAAACAATGAAGATTTACATAAACCATACAAGTATATTCCAACATTCAAGTTAAGTCAAGTAATTAAACGAGATTTAAGACCTACCACAAACACTAAATCGTCTAAGCCATACCAAGTCCCCACATTCCTGAAATAAGTAAATTTAAGCGCAGTAAGAGCCTACCATCCAGTCCATATCTTAATGCATACGGTTATTGAAGGTGAGGGACAATAATTGTGGGGGTCGCACTTGGTGAATTATTCCTGGCATCTGGTTCCTAAT
M0215BC1	Thunnus thynnus	CGTTCAATTAACATTCTTTGTTCACCGTGCGCGCATATTTTAATATGTCTGCGCATGTACATATATGTAATTACACCATATTCATATATAGACCATATATAATAATGTTTTAGGACATATATGTATTAAAACCATTACTAGTATTAAACCATTCATATGTCAATAAATAATGAAGATTTACATAAACCATACGAATAAATTTCAACATTCATCTTGAATTCAGGCGATTAAACGAGATTTAAGACCTAACATAAATCTAAATCGTCTAAGCCATACCAAGTCTCCTCATCTCTGACATCTCGTAAACTTAAGCGCAGTAAGAGCCTACCATCCAGTCCATTTCTTAATGCATACGGTTATTGAAGGTGAGGGACAATAATTGTGGGGGTAACACTTAGT…
M0215BC2	Thunnus thynnus	GTGCGCGCATATTTTAATATGTCTGCGCATGTACATATATGTAATTACACCATATTCATATATAGACCATATATAATAATGTTTTAGGACATATATGTATTAAAACCATTACTAGTATTAAACCATTCATATGTCAATAAATAATGAAGATTTACATAAACCATACAAGTAAGCCTCAACATTCATCTTGAATTCAAGCGATTAAACGAGATTTAAGACCTAACATAAACCTAAATCGTCTAAGCCATACCAAGTCTCCTCATCTCTGACATCTCGTAAACTTAAGCGCAGTAAGAACCTACCATCCAGTCCATTTCTTAATGCATACGGTTATTGAAGGTGAGGGACAATAATTGTGGGGGTAACACTTAGTGAATTATTCCTGGCATCTGGTTCCTA…
M0215BC3	Thunnus albacares	GGATCTATTAAACTTTCTTTGTTCACTATGCGCACATATTTCATATGTCTACGCATGTACATATATGTAATTACACCATACTCATATATGGACCATATATAATAATGCTTTAGGACATATATGTATTAAAACCATTACTAGTACTAAACCATTCATATATCAACAAACAATGAAGATTTACATAAACCATACAGGTATATCTTAATATTCAACCTAAGTCAAGTAATTAAACGAGATTTAAGACCTACCATAACAACTAAATCGTCTAAGCCATACCAAGTATCCCCATTCCTAAAGTCAGGTAAATTTAAGCGCAGTAAGAACCTACCATCCAGTCCATATCTTAATGCATACGGTTATTGAAGGTGAGGGACAATGATTGTGGGGGTAACACCTAGT…
M0215BC4	Thunnus thynnus	AGACTATTAACTATTCTTTGTTCACCGTGCGCGCATATTTTAATATGTCTGCGCATGTACATATATGTAATTACACCATATTCATATATAGACCATATATAATAATGTTTTAGGACATATATGTATTAAAACCATTACTAGTATTAAACCATTCATATGTCAATAAATAATGAAGATTTACATAAACCATACGAATAAATTTCAACATTCACCTTGAATTCAGGCGATTAAACGAGATTTAAGACCTAACATAAATCTAAATCGTCTAAGCCATACCAAGTCTCCTCATCTCTGACATCTCGTAAACTTAAGCGCAGTAAGAGCCTACCATCCAGTCCATTTCTTAATGCATACGGTTATTGAAGGTGAGGGACAATAATTGTGGGGGTAACACTTAGT…
M0215MD1	Thunnus albacares	CGATCTAATAAACATTCTTTGTTCACCTGCGCACATATTTCATATGTCTACGCATGTACATATATGTAATTACACCATACTCATATATCGACCATATATAATAATGCTTTAGGACATATATGTATTAAAACCATTACTAGTACTAAACCATTCATATGTCAACAAACAATGAAGATTTACATAAACCATACATATATATCTTAACATTTAATCTAAGTCAAGTAATTAAACGAGATTTAAGACCTACCACAACAACTAAATCGTCTAAGCCATACCAAGTATCCTCATTCCTAAAGTCAAGCAAATTTAAGCGCAGTAAGAGCCTACCATCCAGTCCATATCTTAATGCATACGGTTATTGAAGGTGAGGGACAATGATTGTGAGGGTAACACCTAGTG…
M0215MD2	Thunnus thynnus	CGATCTATAAACATTCTTTGTTCACCGTGCGCGCATATTTTAATATGTCTGCGCATGTACATATATGTAATTACACCATATTCATATATAGACCATATATAATAATGTTTTAGGACATATATGTATTAAAACCATTACTAGTATTAAACCATTCATATGTCAATAAATAATGAAGATTTACATAAACCATACAAATAAACCTCAACATTCATCTTGAATTCAGGCGATTAAACGAGATTTAAGACCTAGCATAAATCTAAATCGTCTAAGCCATACCAAGTCTCCTCATCTCTGACATCTACGTAAACTTAAGCGCAGTAAGAGCCTACCATCCAGTCCATTTCTTAATGCATACGGTTATTGAAGGTGAGGGACAATAATTGTGGGGGTAACACTTAG…
M0215MD3	Thunnus thynnus	CACCGTGCGCGCATATTTCATATGTCTGCGCATGTACATATATGTAATTACACCATATTCATATATAGACCATACATAATAATGTTTTAGGACATATATGTATTAAAACCATTACTAGTATTAAACCATTCATATGTCAATAAATAATGAAGATTTACATAAACCATACAAATAAATCTCAACATTCATCTTGAATTCAAGCGATTAAACGAGATTTAAGACCTAACATAAATCTAAATCGTCTAAGCCATACCAAGTCTCCTCATCTCTGACATCTCGTAAACTTAAGCGCAGTAAGAGCCTACCATCCAGTCCATTTCTTAATGCATACGGTTATTGAAGGTGAGGGACAATAATTGTGGGGGTAACACTTAGTGAATTATTCCTGGCATCTGGTTC…
M0215MD4	Thunnus thynnus	AGTTCAATACTTTCTTTGTTCCCCGTGCGCGCATATTTAATATGTCTGCGCATGTACATATATGTAATTACACCATATTCATATATAGACCATATATAATAATGTTTTAGGACATATATGTATTAAAACCATTACTAGTATTAAACCATTCATATGTCAATAAATAATGAAGATTTACATAAACCATACAAATAAACCTCAACACTCATTTTGAATTCAGGCGATTAAACGAGATTTAAGACCTAACATAAATCTAAATCGTCTAAGTCATACCAAGTCTCCTCATCTCTGACATCTCGTAAACTTAAGCGCAGTAGAGCCTACCATCCAGTCCTTTCTTAATGCATACGGTTATTGAGGTGAGGACAAAATTGGGGGGTACACTATGATTATCTGGCT…
M0215ML1	Thunnus albacares	AGCACATTACTATTCTTTGTTCACTATGCGCACATATTTTAATATGTCTACGCATGTACATATATGTAATTACACCATACTCATATATGGACCATATATAATAATGCTTTAGGACATATATGTATTAAAACCATTACTAGTACTAAACCATTCATATGTCAACAAACAATGAAGATTTACATAAACCATACAGGTATATCTTAACATTCAACCTAAGTCAAGTAATTAAACGAGATTTAAGACCTACCATAACAACTAAATCGTCTAAGCCATACCAAGTATCCTCATTCCTAAAGTCAGGTAAATTTAAGCGCAGTAAGAACCTACCATCCAGTCCATATCTTAATGCATACGGTTATTGAAGGTGAGGGACAATGATTGTGGGGGTAACACCTAGTG…
M0215ML2	Thunnus albacares	CGGGAATAATGGAAGCATATGCTCATGTTCCCCATGCGCACATATTTTAATATGTCTACGCATGTACATATATGTAATTACACCATACTCATATATCGACCATATATAATAATGCTTTAGGACATATATGTATTAAAACCATTACTAGTACTAAACCATTCATATATCAACAAATAATGAAGATTTACATAAACCATACAGATATATCTTAATATTCAACCTAAGTCAAGTAATTAGACGAGATTTAAGACCTACCATAACAACTAAATCGTCTAAGCCATACCAAGTACCCCCATCCCTAAAATCAAGTAAATTTAAACGCAGTAAGAGCCTACCATCCAGTCCATATCTTAATGTATACGGTTATTGAAGGTGAGGGACAATGATTGTGGGGGTAAC…
M0215ML3	Thunnus albacares	CTATGCGCACATATTTTAATATGTCTACGCATGTACATATATGTAATTACACCATACTCATATATCGACCATATATAATAATGCTTTAGGACATATATGTATTAAAACCATTACTAGTACTAAACCATTCATATGTCAACAAACAATGAAGATTTACATAAACCATACAAATATATCTTAATATTCAATCTAAGTCAAGTAATTAGACGAGATTTAAGACCTACCATAACAACTAAATCGTCTAAGCCATACCAAGTATCCGCATTCCTAAAATCAGGTAAATTTAAGCGCAGTAAGAGCCTACCATCCAGTCCATATCTTAATGCATACGGTTATTGAAGGTGAGGGACAATGATTGTGGGGGTAACACCTAGTGAATTATTCCTGGCATCTGGTTCC…
M0215ML4	Thunnus albacares	GGATCTAATACTTTCTTTGTTCCCCTGCGCACATATTTCATATGTCTACGCATGTACATATATGTAATTACACCATACTCATATATCGACCATATATAATAATGCTTTAGGACATATATGTATTAAAACCATTACTAGTACTAAACCATTCATATGTCAACAAACAATGAAGATTTACATAAACCATACATATATATCTTAATATTTAATCTAAGTCAAGTAATTAAACGAGATTTAAGACCTACCATAACAACTAAATCGTCTAAGCCATACCAAGTATCCTCATTCCTAAAGTCAAGCAAATTTAAGCGCAGTAAGAGCCTACCATCCAGTCCATATCTTAATGCATACGGTTATTGAAGGTGAGGGACAATGATTGTGGGGGTAGCACCTAGTGAA…
M0315BC1	Thunnus thynnus	TTGTTCCCCGTGCGCACATATTTCATATGTCTGCGCATGTACATATATGTAATTACACCATATTCATATATAGACCATATATAATAATGTTTTAGGACATACATGTATTAAAACCATTACTAGTATTAAACCATTCATATGTCAATAAATAATGAAGATTTACATAAACCATACAAATAAATCTCAACATTCATCTTGAATTCAGGCGATTAAACGAGATTTAAGACCTAACATAAATCTAAATCGTCTAAGCCATACCAAGTCCCCTCATCTCTGACATCTCGTAAACTTAAGCGCAGTAAGAACCTACCATCCAGTCCATTTCTTAATGCATACGGTTATTGAAGGTGAGGGACAATAAT
M0315BC2	Thunnus thynnus	TTGTTCCCCGTGCGCACATATTTCATATGTCTGCGCATGTACATATATGTAATTACACCATATTCATATATAGACCATATATAATAATGTTTTAGGACATACATGTATTAAAACCATTACTAGTATTAAACCATTCATATGTCAATAAATAATGAAGATTTACATAAACCATACAAATAAATCTCAACATTCATCTTGAATTCAGGCGATTAAACGAGATTTAAGACCTAACATAAATCTAAATCGTCTAAGCCATACCAAGTCCCCTCATCTCTGACATCTCGTAAACTTAAGCGCAGTAAGAACCTACCATCCAGTCCATTTCTTAATGCATACGGTTATTGAAGGTGAGGGACAATAAT
M0315BC3	Thunnus thynnus	TTGTTCCCCGTGCGCACATATTTCATATGTCTGCGCATGTACATATATGTAATTACACCATATTCATATATAGACCATATATAATAATGTTTTAGGACATACATGTATTAAAACCATTACTAGTATTAAACCATTCATATGTCAATAAATAATGAAGATTTACATAAACCATACAAATAAATCTCAACATTCATCTTGAATTCAGGCGATTAAACGAGATTTAAGACCTAACATAAATCTAAATCGTCTAAGCCATACCAAGTCCCCTCATCTCTGACATCTCGTAAACTTAAGCGCAGTAAGAACCTACCATCCAGTCCATTTCTTAATGCATACGGTTATTGAAGGTGAGGGACAATAAT
M0315BC4	Thunnus thynnus	TTGTTCCCCGTGCGCACATATTTCATATGTCTGCGCATGTACATATATGTAATTACACCATATTCATATATAGACCATATATAATAATGTTTTAGGACATACATGTATTAAAACCATTACTAGTATTAAACCATTCATATGTCAATAAATAATGAAGATTTACATAAACCATACAAATAAATCTCAACATTCATCTTGAATTCAGGCGATTAAACGAGATTTAAGACCTAACATAAATCTAAATCGTCTAAGCCATACCAAGTCCCCTCATCTCTGACATCTCGTAAACTTAAGCGCAGTAAGAACCTACCATCCAGTCCATTTCTTAATGCATACGGTTATTGAAGGTGAGGGACAATAAT
M0315MD1	Thunnus thynnus	CCAATTAACATTCTTTGTTCCCCGTGCGCACATACAACAAACGTCTGCGCAGAACAAAAAAGAAAACACACCAAAAACAAAAAAGACAAAAAAAAAAAAGCCAAAGGACAAACAAGCAACAAAACCACCACAAGAAAAAAACCAAACACAAGACAACAAAAAACGAAGAAACACAAAAACCAAACAAACAAACCTCAACACACACCCCGAACACAGGCGATTAAACGAGATACAAGACCTAACATAAATCTAAATCGTCTAAGCCATACCAAGCCCCCTCATCTCTGACATCTCGTAAACTTAAGCGCAGTAAGAACCTACCATCCAGCCCATCCCTTAATGCATACGGTTATTGAAGGTGAGGGACAATAATTGTGGGGGCAACACTTAGTGAATAAT…
M0315MD2	Thunnus thynnus	GGGGATCAATTAACATTCTTTGTTCCCCGTGCGCGCATATTTCATATGTCTGCGCATGTACATATATGTAATCACACCATATTCATATATGGACCATATATAATAATGTTTTAGGACATATATGCATTAAAACCATTACTAGTATTAAACCATTCATATGTCAATAAATAATGAAGATTTACATAAACCATACAAATAAACCTCAACATTCATCTTGAATTCAGGCGATTAAACGAGATTTAAGACCTAACATAAATCTAAATCGTCTAAGCCACACCAAGTCTCCTCATCTCTGGCATCTCGTAAACTTAAGCGCAGTAAGAGCCTACCATCCAGTCCATTTCTTAATGCATACGGTTATTGAAGGTGAGGGACAATAATTGTGGGGGTAACACTTAG…
M0315MD3	Thunnus thynnus	ACTGTTAACTTTCTTTGTTCCCCGTGCGCGCATATTTAATATGTCTGCGCACGAACACACAAGAAACAACACCAAAAACCACAAGGACCCAAAAAATAACGACCAAGGACACACACGAACCAAAACCATCACTAGCATCAAACCATACATATGCCAATAAATAATGAAGATTTACATAAACCATACAAATAAACCTCAACATTCATCTTGAATTCAGGCGATTAAACGAGATTTAAGACCTAACATAAATCTAAATCGTCTAAGCCACACCAAGTCTCCTCATCTCTGGCATCTCGTAAACTTAAGCGCAGTAAGAGCCTACCATCCAGTCCATTTCTTAATGCATACGGTTATTGAAGGTGAGGGACAATAATTGTGGGGGTAACACTTAGTGAATTA…
M0315MD4	Thunnus thynnus	CTGATTAACTTTCTTTGTTCCCCGTGCGCGCATATTTAATATGTCTGCGCATGAACATATATGAAATAACACCATATACTATATAGACCATATATAATAATGACTTAGGACATATATGCATTAAAACCATCACTAGTATTAAACCATACATATGTCAATAAATAATGAAGATTTACATAAACCATACAAATAAACCTCAGCATTCGTCTTGAATTCAGGCGATTAAACGAGATTTAAGACCTAACATAAATCTAAATCGTCTAAGCCATACCAAGTCTCCTCATCTCTGACATCTCGTAAACTTAAGCGCAGTAAGAGCCTACCATCCAGTCCATTTCTTAATGCATACGGTTATTGAAGGTGAGGGACAATAATTGTGGGGGTAACACTTAGTGAATT…
M0315ML1	Thunnus thynnus	GGATCAAATGAAACATTTTTTGTTCCCCGTGCGCGCATATTTCATATGTCTGCGCATGTACATATATGTAATTACACCATATTCATATATAGACCATATACAATAATGTTTTAGGACATATATGTATTAAAACCATTACTAGTATTAAACCATTCATATGTCAATAAATAATGAAGATTTACATAAACCATACAAATAAGCCTCAACATTCACCTTGAATTCAGGCGATTAAACGAGATTTAAGACCTAACATAAATCTAAATCGTCTAAGCCATACCAAGTCTCCTCATCTCTAACATCTCGTAAACTTAAGCGCAGTAAGAGCCTACCATCCAGTCCATTTCTTAATGCATACGGTTATTGAAGGTGAGGGACAATAATTGTGGGGGTAACACTTAG…
M0315ML2	Thunnus albacares	CGATTATTAACTTTCTTTGTTCACTATGCGCACATATTTAATATGTCTACGCATGCACACATATGAAACCACACCATAATCTACATCGACCATACACAATAACGCCCTAGGACATATATGAACCAAAACCATCACTAGTACTAAACCATCCATATATCAACAAACAATGAAGATTTACATAAACCATACAGATATATCTTAACATTCAATCTAAGTCAAGTAATTAAACGAGATTTAAGACCTACCATAATAACTAAATCGTCTAAGCCATACCAAGTACCCCCATCCCTAAAGTCAGGTAAATTTAAGCGCAGTAAGAGCCTACCATCCAGTCCATATCTTAATGCATACGGTTATTGAAGGTGAGGGACAATGATTGTGGGGGTAACACCTAGTGAA…
M0315ML3	Thunnus albacares	ATGCGCACATATTTCATATGTCTACGCATGTACATATATGTAATTACACCATACTCATATATCGACCATATATAATAATGCTTTAGGACATACATGTATTAAAACCATTACTAGTACTAAACCATTCATATGTCAACAAACAATGAAGATTTACATAAACCATACAGGTATATCTTAATATTCAATCTAAGTCGAGTAATTAAACGAGATTTAAGACCTACCATAACAACTAAATCGTCTAAGCCATACCAAGTATCCTCATCCCTAAAGTCAGGTGAATTTAAGCGCAGTAAGAGCCTACCATCCAGTCCATATCTTAATGCATACGGTTATTGAAGGTGAGGGACAATGATTGTGGGGGTAACACCTAGTGAATTATTCCTGGCATCTGGTTCCTAA…
M0315ML4	Thunnus albacares	GGGTTAATTAACATTTTTTGTTCCCTATGCGCACATATTTCATATGTCTACGCATGTACATATATGTAATTACACCATACCCATATATGAACCATATATAATAATGCTTTAGGACATATATGTATTAAAACCATTACTAGTACTAAACCATTCATATGTCAACAAACAATGAAGATTTACATAAACCATACAAGTATATCTTAATATTCAATCTAAGTCAAGTAATTAAACGAGATTTAAGACCTACCATAACAACTAAATCGTCTAAGCCATACCAAGTATCCCCATTCCTAAAGTCAGGTAAATTTAAGCGCAGTAAGAGCCTACCATCCAGTCCATATCTTAATGCATACGGTTATTGAAGGTGAGGGACAATAATTGTGGGGGTAACACCTAGTG…
M0415BC1	Thunnus thynnus	GGGGATCAATTAACATTCTTTGTTCCCCGTGCGCGCATATTTCATATGTCTGCGCATGTACATATATGTAATCACACCATATTCATATATGGACCATATATAATAATGTTTTAGGACATATATGCATTAAAACCATTACTAGTATTAAACCATTCATATGTCAATAAATAATGAAGATTTACATAAACCATACAAATAAACCTCAACATTCATCTTGAATTCAGGCGATTAAACGAGATTTAAGACCTAACATAAATCTAAATCGTCTAAGCCACACCAAGTCTCCTCATCTCTGGCATCTCGTAAACTTAAGCGCAGTAAGAGCCTACCATCCAGTCCATTTCTTAATGCATACGGTTATTGAAGGTGAGGGACAATAATTGTGGGGGTAACACTTAG…
M0415BC2	Thunnus albacares	TAAAATAAAACCATTCTTTGTTCACTATGCGCACATATTTCATATGTCTACGCATGTACATATATGTAATTACACCATACTCATATATCGACCATATATAATAATGCTTTAGGACATATATGTATTAAAACCATTACTAGTACTAAACCATTCATATGTCAACAAACAATGAAGATTTACATAAACCATACAGATATATCTTAATATTCAATCTAAGTCAAGTAATTAAACGAGATTTAAGACCTACCATAACAACTAAATCGTCTAAGCCATACCAAGTATCCCCATTCCTAAAGTCAGGTAAATTTAAGCGCAGTAAGAGCCTACCATCCAGTCCATATCTTAATGCATACGGTTATTGAAGGTGAGGGACAATGATTGTGGGGGTAACACCTAGTG…
M0415BC3	Thunnus thynnus	GGGGATCAATTAACATTCTTTGTTCCCCGTGCGCGCATATTTCATATGTCTGCGCATGTACATATATGTAATCACACCATATTCATATATGGACCATATATAATAATGTTTTAGGACATATATGCATTAAAACCATTACTAGTATTAAACCATTCATATGTCAATAAATAATGAAGATTTACATAAACCATACAAATAAACCTCAACATTCATCTTGAATTCAGGCGATTAAACGAGATTTAAGACCTAACATAAATCTAAATCGTCTAAGCCACACCAAGTCTCCTCATCTCTGGCATCTCGTAAACTTAAGCGCAGTAAGAGCCTACCATCCAGTCCATTTCTTAATGCATACGGTTATTGAAGGTGAGGGACAATAATTGTGGGGGTAACACTTAG…
M0415BC4	Thunnus albacares	TAAAATAAAACCATTCTTTGTTCACTATGCGCACATATTTCATATGTCTACGCATGTACATATATGTAATTACACCATACTCATATATCGACCATATATAATAATGCTTTAGGACATATATGTATTAAAACCATTACTAGTACTAAACCATTCATATGTCAACAAACAATGAAGATTTACATAAACCATACAGATATATCTTAATATTCAATCTAAGTCAAGTAATTAAACGAGATTTAAGACCTACCATAACAACTAAATCGTCTAAGCCATACCAAGTATCCCCATTCCTAAAGTCAGGTAAATTTAAGCGCAGTAAGAGCCTACCATCCAGTCCATATCTTAATGCATACGGTTATTGAAGGTGAGGGACAATGATTGTGGGGGTAACACCTAGTG…
M0415MD1	Thunnus obesus	TCCAAAAGTATGATTAAGAAGATAAAAAAAAGATTTTTCCGACAGGGTGAGCTCTAATTAGTCATTATTTCTTGCTCCCCGTGCGCACATATTTGAATATGTCTGCGCACGTACATATATGTAATTACACCATATTTATATATGGACCATATACAGTAATGTTCTAGGACATATATGTATTAAAACCATTACTAGTACTAAACCATTCATATATCAACAAACAATGAAAACTTACATAAACCATACAGATATATTCCAACATTCAAGTTAAGTCAGGTAATTAAACGAGATTTAAGACCTACCACAAACACTAAATCGTCTAAGCCATACCAAGTCTCCCCATCCCTGAAATCGAGTAAATTTAAGCGCAGTAAGAGCCTACCATCCAGTCCATATCTT…
M0415MD2	Thunnus thynnus	GGATCTAATTAACTTTCTTTGTTCCCCTGCGCAGATATTTACAATATGTCTGTGCATGTACATATATGTAATTACACCATAACTATATTTGAAACATATATAATAATGCTTTAGGACATATATGTATTAAAACCATAACTAGTATTTAACCATTCATATGTCAACATATCATGAAGACTTACATAAAACATAACAACCATCTCCCAACACTTTATTTATATCACGTAATTAGACGAGATTTAAGACCTAACATAAACCTAAATCGTCTAAGCCATACCAAGTCCCCTCATCTCTAAAATCTAGTAAACTTATGCGCAGTAAGAGCCTACCATCCAGTCCATTTCTTAATGCATACGGTTATTGAAGGTGAGGGACAATAATCGTGGGGGTAACACTTAG…
M0415MD3	Thunnus albacares	TAAAATAAAACCATTCTTTGTTCACTATGCGCACATATTTCATATGTCTACGCATGTACATATATGTAATTACACCATACTCATATATCGACCATATATAATAATGCTTTAGGACATATATGTATTAAAACCATTACTAGTACTAAACCATTCATATGTCAACAAACAATGAAGATTTACATAAACCATACAGATATATCTTAATATTCAATCTAAGTCAAGTAATTAAACGAGATTTAAGACCTACCATAACAACTAAATCGTCTAAGCCATACCAAGTATCCCCATTCCTAAAGTCAGGTAAATTTAAGCGCAGTAAGAGCCTACCATCCAGTCCATATCTTAATGCATACGGTTATTGAAGGTGAGGGACAATGATTGTGGGGGTAACACCTAGTG…
M0415MD4	Thunnus thynnus	GTGCGCGCATATTTCATATGTCTGCGCATGTACATATATGTAATTACACCATATTCATATATAGACCATATACAATAATGTTTTAGGACATATATGTATTAAAACCATTACTAGTATTAAACCATTCATATGTCAATAAATAATGAAGATTTACATAAACCATATAAATAAGCCTCAACATTCACCTTGAATTCAGGCGATTAAACGAGATTTAAGACCTAACATAAATCTAAATCGTCTAAGCCATACCAAGTCTCCTCATCTCTAACATCTCGTAAACTTAAGCGCAGTAAGAGCCTACCATCCAGTCCATTTCTTAATGCATACGGTTATTGAAGGTGAGGGACAATAATTGTGGGGGTAACACTTAGTGAACTAGGGAGTGGCGTCTGGTTCCTA…
M0415ML1	Thunnus albacares	GGCACTCCTACCATATCTAAGTTCACAATGCGCAACAAAATAAAAAGACAACGCAAGAACAAAAAAGCAAAAACACCAAACACAAAAAACGACCAAAAAAAAAAAAGCAAAAGGACAAGAAAGAAAAAAAACCAAAACAAGAACAAAACCAAACACAAAACAACAAACAACGAAGATACACATAAACCATACAGATACATCTTAACATACAATCTAAGACGAGCAATCAAACGAGATCTAAGACCTACCATAACAACTAAATCGTCTAAGCCATACCAAGCATCCTCATACCTAAAGCCAGGTAAATTTAAGCGCAGTAAGAGCCTACCATCCAGTCCATATCTTAATGCATACGGTTATTGAAGGTGAGGGACAATGATTGTGGGGGTAGCACCTAGT…
M0415ML2	Thunnus albacares	TCACTAAACTTTCTTTTGTTCCCTATGCGCACACACATTAACACGACAACGCAAGAACACACAAGAAACAACACCACACCCACACACGGACCACAAAAAATAACGCACAAGGACACACACGAAACAAAACCATCACTAGCACTAAACCATCCATATATCAACAAACAATGAAGATTTACATAAACCATACAGGTATATCTTAATATTCAGTCTAAGTCAAGTAATTAAACGAGATTTAAGACCTACCATAACAACTAAATCGTCCAAGCCATACCAAGTATCCCCATTCCTAAAGTCAAGTAAATTTAAGCGCAGTAAGAACCTACCATCCAGTCCATATCTTAATGCATACGGTTATTGAAGGTGAGGGACAATGATTGTGGGGGTAACACCTAGTGA…
M0415ML3	Thunnus albacares	TCAATAAACTTTTCTTTTGTTCACTATGCGCACATACATTAATATGTCAACGCACGAACACACAAGAAACAACACCACACACACACAACGACCACAAAAAACAACGCCACAGGACAAAAAAGAACCAAAACCACCACAAGAACCAAACCACACATATATCAACAAACAATGAAGATCTACATAAACCATACAAATATATCTTAACATCCAACCTAAGCCAAGCAATCAGACGAGATTTAAGACCTACCACAACAACTAAATCGTCTAAGCCATACCAAGTATCCCCATTCCTAAAGTCAAGTAAATTTAAGCGCAGTAAGAACCTACCATCCAGTCCATATCTTAATGCATACGGTTATTGAAGGTGAGGGACAATAATTGTGGGGGTAACACCTAGTG…
M0415ML4	Thunnus albacares	TTATTAACTTTCTTTGTTCCCTATGCGCACATATTTAATATGTCTACGCACGAACACATACGAAACAACACCATACCCATAAAAGGACCTAAAAAATAACGCCCCAGGACAAATATGAACCAAAACCATCACTAGCACTAAACCATACATATGACAACAAACAATGAAGATTTACATAAACCATACAAGCATATCTTAATATTCAATCTAAGCCAAGTAATTAAACGAGATTTAAGACCTACCATAACAACTAAATCGTCTAAGCCATACCAAGTATCCCCATTCCTAAAGTCAGGTAAATTTAAGCGCAGTAAGAGCCTACCATCCAGTCCATATCTTAATGCATACGGTTATTGAAGGTGAGGGACAATGATTGTGGGGGTAACACCTAGTGAATTA…
M0515BC1	Thunnus thynnus	GTGCGCGCATATTTCATATGTCTGCGCATGTACATATATGTAATTACACCATATTCATATATAGACCATATACAATAATGTTTTAGGACATATATGTATTAAAACCATTACTAGTATTAAACCATTCATATGTCAATAAATAATGAAGATTTACATAAACCATATAAATAAGCCTCAACATTCACCTTGAATTCAGGCGATTAAACGAGATTTAAGACCTAACATAAATCTAAATCGTCTAAGCCATACCAAGTCTCCTCATCTCTAACATCTCGTAAACTTAAGCGCAGTAAGAGCCTACCATCCAGTCCATTTCTTAATGCATACGGTTATTGAAGGTGAGGGACAATAATTGTGGGGGTAACACTTAGTGAACTAGGGAGTGGCGTCTGGTTCCTA…
M0515BC2	Thunnus thynnus	GTGCGCGCATATTTCATATGTCTGCGCATGTACATATATGTAATTACACCATATTCATATATAGACCATATACAATAATGTTTTAGGACATATATGTATTAAAACCATTACTAGTATTAAACCATTCATATGTCAATAAATAATGAAGATTTACATAAACCATATAAATAAGCCTCAACATTCACCTTGAATTCAGGCGATTAAACGAGATTTAAGACCTAACATAAATCTAAATCGTCTAAGCCATACCAAGTCTCCTCATCTCTAACATCTCGTAAACTTAAGCGCAGTAAGAGCCTACCATCCAGTCCATTTCTTAATGCATACGGTTATTGAAGGTGAGGGACAATAATTGTGGGGGTAACACTTAGTGAACTAGGGAGTGGCGTCTGGTTCCTA…
M0515BC3	Thunnus thynnus	GTGCGCGCATATTTCATATGTCTGCGCATGTACATATATGTAATTACACCATATTCATATATAGACCATATACAATAATGTTTTAGGACATATATGTATTAAAACCATTACTAGTATTAAACCATTCATATGTCAATAAATAATGAAGATTTACATAAACCATATAAATAAGCCTCAACATTCACCTTGAATTCAGGCGATTAAACGAGATTTAAGACCTAACATAAATCTAAATCGTCTAAGCCATACCAAGTCTCCTCATCTCTAACATCTCGTAAACTTAAGCGCAGTAAGAGCCTACCATCCAGTCCATTTCTTAATGCATACGGTTATTGAAGGTGAGGGACAATAATTGTGGGGGTAACACTTAGTGAACTAGGGAGTGGCGTCTGGTTCCTA…
M0515BC4	Thunnus obesus	TCCAAAAGTATGATTAAGAAGATAAAAAAAAGATTTTTCCGACAGGGTGAGCTCTAATTAGTCATTATTTCTTGCTCCCCGTGCGCACATATTTGAATATGTCTGCGCACGTACATATATGTAATTACACCATATTTATATATGGACCATATACAGTAATGTTCTAGGACATATATGTATTAAAACCATTACTAGTACTAAACCATTCATATATCAACAAACAATGAAAACTTACATAAACCATACAGATATATTCCAACATTCAAGTTAAGTCAGGTAATTAAACGAGATTTAAGACCTACCACAAACACTAAATCGTCTAAGCCATACCAAGTCTCCCCATCCCTGAAATCGAGTAAATTTAAGCGCAGTAAGAGCCTACCATCCAGTCCATATCTT…
M0515ML1	Thunnus albacares	TATGCGCACATATTTCATATGTCTACGCATGTACATATATGTAATTACACCATACTTATATATCGACCATATATAATAATGCTTTAGGACATATATGTATTAAAACCATTACTAGTACTAAACCATTCATATGTCAACAAACAATGAAGACTTACATAAACCATACAGATATATCTTAATATTCAACCTAAGTCAAGTAATTAAACGAGATTTAAGACCTACCATAACAACTAAATCGTCTAAGCCATACCAAGTATCCCCATTCCTAAAGTCAAGTAAATTTAAGCGCAGTAAGAGCCTACCATCCAGTCCATATCTTAATGCATACGGTTATTGAAGGTGAGGGACAATGATTGTGGGGGTAACACCTAGTGAATTATTCCTGGCATCTGGTTCCT
M0515ML2	Thunnus albacares	ACATATTTCAATATGTCTACGCATGTACATATATGTAATTACACCATACTCATATATCGACCATATATAATAATGCTTTAGGACATACATGTATTAAAACCATTACTAGTACTAAACCATTCATATGTCAACAAACAATGAAGATTTACATAAACCACACACATATATCTCAATATTCAATCTAAGTCAAGTAATTAGACGAGATTTAAGACCTACCATAAACAACTAAATCGTCTAAGCCATACCAAGTATCCTCATTCCTAAAATCAGGTAAATTTAAGCGCAGTAAGAGCCTACCATCCAGTCCATATCTTAATGCATACGGTTATTGAAGGTGAGGGACAATGATTGTGGGGGTAACACCTAGTGAATTATTCCTGGCATCTGGTTCCTAAT
M0515ML3	Thunnus obesus	CGCGTGCGCACATATTTCATATGTCTGCGCACGTACATATATGTAATTACACCATATCTATATATGGACCATATACAGTAATGTTCTAGGACATATATGTATTAAAACCATTACTAGTACTAAACCATTCATATATCAACAAACAATGAAGACTTACATAAACCATACAGATATATCCCAACATTCAAATTAAGTCAGGTAATTAAACGAGATTTAAGACCTACCACAAACACTAAATCGTCTAAGCCATACCAAGTCCCCTCATTCCTGAAATCAAGTAAATTTAAGCGCAGTAAGAACCTACCATCCAGTCCATATCTTAATGCATACGGTTATTGAAGGTGAGGGACAATAATTGTGGGGGTAGCTCTCAGTGAATTATTCCTGG
M0515ML4	Thunnus albacares	CGATATTTCATATGTCTACGCATGTACATATATGTAATTACACCATACTCATATATCGACCATATATAATAATGCTTTAGGACATATATGTATTAAAACCATTACTAGTACTAAACCATTCATATGTCAACAAACAATGAAGATTTACATAAACCATACAGATATATCTTAATATTCAATCTAAGTCAAGTAATTAAACGAGATTTAAGACCTACCATAACAACTAAATCGTCTAAGCCATACCAAGTATCCCCATTCCTAAAGTCAGGTAAATTTAAGCGCAGTAAGAACCTACCATCCAGTCCATATCTTAATGCATACGGTTATTGAAGGTGAGGGACAATGATTGTGGGGGTAACACCTAGTGAATTATTCCTGGCATCTGGT
M0615BC1	Thunnus obesus	TGTCTACGCATGTACATATATGTAATTACACCATACTCATATATCGACCATATATAATAATGCTTTAGGACATATATGTATTAAAACCATTACTAGTACTAAACCATTCATATGTCAACAAACAATGAAGATTTACATAAACCATACAGATATATCTTAATATTCAACCTAAGTCAAGTAATTAAACGAGATTTAAGACCTACCATAACAACTAAATCGTCTAAGCCATACCAAGTATCCCCATTCCTAAAGTCAAGTAAATTTAAGCGCAGTAAGAGCCTACCATCCAGTCCATATCTTAATGCATACGGTTATTGAAGGTGAGGGACAATGATTGTGGGGGTAACACCTAGTGAATTATTCCTGGCAT
M0615BC2	Thunnus obesus	TGTCTGTGCATGTACATATATGTAATTACACCATAACTATATTTGAAACATATATAATAATGCTTTAGGACATATATGTATTAAAACCATAACTAGTATTTAACCATTCATATGTCAACATATCATGAAGACTTACATAAAACATAACAACCATCTCCCAACACTTTATTTATATCACGTAATTAGACGAGATTTAAGACCTAACATAAACCTAAATCGTCTAAGCCATACCAAGTCCCCTCATCTCTAAAATCTAGTAAACTTATGCGCAGTAAGAGCCTACCATCCAGTCCATTTCTTAATGCATACGGTTATTGAAGGTGAGGGACAATAATCGTGGGGGTAACACTTAGTGAATTATTCCTGGCAT
M0615BC3	Thunnus thynnus	TGTAATTACACCATATTCATATATAGACCATATATAATAATGTTTTAGGACATATATGTATTAAAACCATTACTAGTATTAAACCATTCATATGTCAATAAATAATGAAGATTTACATAAACCATACAAATAAACCTCAACATTCATCTTGAATTCAGGCGATTAAACGAGATTTAAGACCTAACATAAATCTAAATCGTCTAAGCCATACCAAGTCTCCTCATCTCTGACATCTCGTAAACTTAAGCGCAGTAAGAACCTACCATCCAGTCCATTTCTTAATGCATACGGTTATTGAAGGTGAGGGACAATAATTGTGGGGGTAACACTTAGTGAATTATTCCTGGCATCTGGTTCCTAATTCACGATT
M0615BC4	Thunnus obesus	CTACGCACGTACATATATGTAATTACACCATATTTATATATTAACCATATATAATAATGTTCTAGGACATATATGTATTAAAACCATTACTAGTACTAAACCATTCATATATCAACAAACAATGAAGGTTTACATAAACCATACAGGTATATCTCAACATCCATACTAAGTCAAGTAATTAAACGAAACTTAAGACCTACCACAAACACTAAATCGTCTAAGCCAAACCAAGTCCCATCATCTCTAAAATCAAGTAAATTTAAGCGCAGTAAGAGCCTACCATCCAGTCCATATCTTAATGCATACGGTTATTGAAGGTGAGGGACAATAATTGTGGGGGTAACACTTAGTGAATTATTCCTGGCATCTG
M0615ML1	Thunnus thynnus	GCGCATATTTCATATGTCTGCGCATGTACATATATGTAATTACACCATATTCATATATAGACCATATATAATAATGTTTTAGGACATATATGTATTAAAACCATTACTAGTATTAAACCATTCATATGTCAGTAAATAATGAAGATTTACATAAACCATACAAATAAACCTCAACATTCATCTTGAATTCAGGCGATTAAACGAGATTTAAGACCTAACATAAATCTAAATCGTCTAAGCCATACCAAGTCTCCTCATCCCTGATATCTACGTAAACTTAAGCGCAGTAAGAGCCTACCATCCAGTCCATTTCTTAATGCATACGGTTATTGAAGGTGAGGGACAATAATTGTGGGGGTAACACTTAGTGAATTATTCCTGGCATCTGGTTCCTAATT
M0615ML2	Thunnus albacares	TTCATATGTCTACGCATGTACATATATGTAATTACACCATACTCATATATCGACCATATATAATAATGCTTTAGGACATATATGTATTAAAACCATTACTAGTACTAAACCATTCATATGTCAACAAACAATGAAGATTTACATAAACCATACATATATATCTTAACATTTAATCTAAGTCAAGTAATTAAACGAGATTTAAGACCTACCATAACAACTAAATCGTCTAAGCCATACCAAGTATCCTCATTCCTAAAGTCAAGCAAATTTAAGCGCAGTAAGAGCCTACCATCCAGTCCATATCTTAATGCATACGGTTATTGAAGGTGAGGGACAATGATTGTGGGGGTAGCACCTAGTGAATTATTCCTGGCATCTGGTTCCTAATTCAG
M0615ML3	Thunnus thynnus	TGCGCGCATATTTTAATATGTCTGCGCATGTACATATATGTAATTACACCATATTCATATATAGACCATATATAATAATGTTTTAGGACATATATGTATTAAAACCATTACTAGTATTAAACCATTCATATGTCAATAAATAATGAAGATTTACATAAACCATACAAATAAGCCTCAACATTCATTTTGAATTCAGGCGATTAAACGAGATTTAAGACCTAACATAAATCTAAATCGTCTAAGTCATACCAAGTCTCCTCATCTCTAACATCTCGTAAACTTAAGCGCAGTAAGAGCCTACCATCCAGTCCATTTCTTAATGCATACGGTTATTGAAGGTGAGGGACAATAATTGTGGGGGTAACACTTAGTGAATTATTCCTGGCATCTGGTTCCTA
M0615ML4	Thunnus albacares	GTTTTCATATGTCTACGCATGTACATATATGTAATTACACCATACTCATATATCGACCATATATAATAATGCTTTAGGACATATATGTATTAAAACCATTACTAGTACTAAACCATTCATATGTCAACAAACAATGAAGATTTACATAAACCATACAAATATATCTTAATATTCAATCTAAGTCAAGTAATTAAACGAGATTTAAGACCTACCATAACAACTAAATCGTCTAAGCCATACCAAGTATCCTCATCCCTAAAGTCAAGTAAATTTAAGCGCAGTAAGAACCTACCATCCAGTCCATATCTTAATGCATACGGTTATTGAAGGTGAGGGACAATGATTGTGGGGGTAACACCTAGTGAATTATTCCTGGCATCTGGTTCCTAATTCAA
M0715BC1	Thunnus obesus	TGCGTACATATTTCATATGTCTGCGCACGTACATATATGTAATTACACCATATTTATATATGGACCATATACAATAATGTTCTAGGACATATATGTATTAAAACCATTACTAGTACTAAACCATTCATATATCAACAAACAATGAAGACTTACGCAAACCATACAGATATATTCCAACATTCAAGTTAAGTCAAGTAATTAAACGAGATTTAAGACCTACCACAAACACTAAATCGTCTAAGCCATACCAAGTCTCCTCATCCCTGAAGTGAGTAAATTTAAGCGCAGTAAGAGCCTACCATCCAGTCCATATCTTAATGCATACGGTTATTGAAGGTGAGGGACAACAATTGTGGGGGTAGCACTCAGTGAATTATTCCTGGCATCT
M0715BC2	Thunnus obesus	CATATTTCATATGTCTGCGCACGTACATATATGTAATTACACCATATTTATATATGGACCATATACAATAATGTTCTAGGACATATATGTATTAAAACCATTACTAGTACTAAACCATTCATATATCAACAAACAATGAAGACTTACATAAACCATACAGACATATTCCAACATTCAAATTAAGTCAAGTAATTAGACGAGATTTAAGACCTACCACAAACACTAAATCGTCTAAGCCATACCAAGTCTCCTCATTCCTGAAATCGAGTAAATTTAAGCGCAGTAAGAGCCTACCATCCAGTCCATATCTTAATGCATACGGTTATTGAAGGTGAGGGACAATAATTGTGGGGGTAGCACCTAGTGAATTATTCCTGGCATCTGGTTC
M0715BC3	Thunnus obesus	CCCATATTTCATATGTCTACGCACGTACATATATGTAATTACACCATACTTATATATTAACCATATACAATAATGTTCTAGGACATATATGTATTAAAACCATTACTAGTATTAAACCATTCATATGTCAACAAACAATGAAGGTTTACATAAACCATACAGACATACCTCAACATCCATGCTAAGTCAAGTAATTGAACGAAATTTAAGACCTACCACAAACATTAAATCGTCTAAGCCAAACCAAGTCCCACCATCTCTAAAATCAAGTAAATTTAAGCGCAGTAAGAGCCTACCATCCAGTCCATATCTTAATGCATACGGTTATTGAAGGTGAGGGACAATGATTGTGGGGGTAACACTTAGTGAATTATTCCTGGCATCTGGTTCCA
M0715BC4	Thunnus obesus	TCATATGTCTGCGCACGTACATATATGTAATCACACCATATCTATATATGGACCATATACAATAATGTTCTAGGACATACATGCATTAAAACCATTACTAGTACTAAACCATCCATATATCAACAAACAATGAAGACTTACATAAACCATACAGATATATTCCAACACTCAAGCTAAGCCAAGTAATTAAACGAGATTTAAGACCTACCACAAACACTAAATCGTCTAAGCCATACCAAGTCTCCTCATCCCCGAAATCAAGCAAATTTAAGCGCAGTAAGAGCCTACCATCCAGTCCATATCTTAATGCATACGGTTATTGAAGGTGAGGGACAATAATTGTGGGGGTAACACTCAGTGAATTATTCCTGGCATCTGGTT
M0715MD1	Thunnus thynnus	GATACTTTACAATATGTCTGCGCATGTACATATATGTAATTACACCATAACTATATTTGAAACATATATAATAATGCTTTAGGACATGTATGTATTAAAACCATAACTAGTATTTAACCATTCATATGTCAACATATCATGAAGACTTACATAAAACATAGCAACCATCTCCCAACACTTTATTAATATCATGTAATTAGACGAGATTTAAGACCTAACATAAACCTAAATCGTCTAAGCCATACCAAGTCCCCTCATCTCTAAAATCCAGTAAACTTATGCGCAGTAAGAGCCTACCATCCAGTCCATTTCTTAATGCATACGGTTATTGAAGGTGAGGGACAATAATCGTGGGGGTAACACTTAGTGAATTATTCCTGGCATCTGGTTCCTAATTCA…
M0715MD2	Thunnus thynnus	GATACTTTACAATATGTCTGCGCATGTACATATATGTAATTACACCATAACTATATTTGAAACATATATAATAATGCTTTAGGACATGTATGTATTAAAACCATAACTAGTATTTAACCATTCATATGTCAACATATCATGAAGACTTACATAAAACATAGCAACCATCTCCCAACACTTTATTAATATCATGTAATTAGACGAGATTTAAGACCTAACATAAACCTAAATCGTCTAAGCCATACCAAGTCCCCTCATCTCTAAAATCCAGTAAACTTATGCGCAGTAAGAGCCTACCATCCAGTCCATTTCTTAATGCATACGGTTATTGAAGGTGAGGGACAATAATCGTGGGGGTAACACTTAGTGAATTATTCCTGGCATCTGGTTCCTAATTCA…
M0715ML1	Thunnus albacares	TACGCATGTACATATATGTAATTACACCATACTCATATATCGACCATATATAATAATGCTTTAGGACATATATGTATTAAAACCATTACTAGTACTAAACCATTCATATGTCAACAAACAATGAAGATTTACATAAACCATACAAATATATCTTAATATTCAATCTAAGTCAAGTAATTAGACGAGATTTAAGACCTACCATAACAACTAAATCGTCTAAGCCATACCAAGTATCCCCATCCCTAAAGTCAAGTAAATTTAAGCGCAGTAAGAGCCTACCATCCAGTCCATATCTTAATGCATACGGTTATTGAAGGTGAGGGACAATGATTGTGGGGGTAACACCTAGTGAATTATTCCTGGCATCTGG
M0715ML2	Thunnus albacares	TCTACGCATGTACATATATGTAATTACACCATACTCATATATCGACCATATATAATAATGCTTTAGGACATATATGTATTAAAACCATTACTAGTACTAAACCATTCATATGTCAACAAACAATGAAGACTTACATAAACCATACAAATATATCTTAACATTCAACCTAAGTCAAGTAATTAAACGAGATTTAAGACCTACCATGACAACTAAATCGTCTAAGCCATACCAAGTATCCTCATTCCTAAAGTCAGGTAAATTTAAGCGCAGTAAGAGCCTACCATCCAGTCCATATCTCAATGCATACGGTTATTGAAGGTGAGGGACAATGATTGTGGGGGTAACACCTAGTGAATTATTCCTGGCATCT
M0715ML3	Thunnus albacares	CATATTTTATATATGTCTACGCATGTACATATATGTAATTACACCATACTCATATATCGACCATATATAATAATGCTTTAGGACATATATGTATTAAAACCATTACTAGTACTAAACCATTCATATGTCAACAAACAATGAAGATTTACATAAACCACACAGATATACCTCAACATTCAATCTAAGTCAAGTAATTAGACGAGATTTAAGACCTACCATAACAACTAAATCGTCTAAGCCATACCAAGTATCCTCATTCCTAAAGTCAAGTAAACTTAAGCGCAGTAAGAGCCTACCATCCAGTCCATATCTTAATGCATACGGTTATTGAAGGTGAGGGACAATGATTGTGGGGGTAACACCTAGTGAATTATTCCTGGCATCTGGTTCCTAATT
M0715ML4	Thunnus albacares	TATGTCTACGCATGTACATATATGTAATTACACCATACTCATATATCGACCATATATAATAATGCTTTAGGACATATATGTATTAAAACCATTACTAGTACTAAACCATTCATATGTCAACAAACAATGAAGATTTACATAAACCATACATATATATCTTAACATTCAATCTAAGTCAAGTAATTAAACGAGATTTAAGACCTACCATAATAACTAAATCGTCTAAGCCATACCAAGTATCCTCATTCCTAAAGTCAGGCAAATTTAAGCGCAGTAAGAGCCTACCATCCAGTCCATATCTTAATGCATACGGTTATTGAAGGTGAGGGACAATGATTGTGGGGGTAGCACCTAGTGAATTATTCCTGGC
M0815BC1	Thunnus obesus	GTGCGTACACACTTTAATATGTCTGCGCACGTACATATATGTAATTACACCATATTTATATATGGACCATATACAATAATGTTCTAGGACATATATGTATTAAAACCATTACTAGTACTAAACCATTCATATATCAACAAACAATGAAGACTTACACAAACCATACAGATATATTCCAACATTCAAGTTAAGTCAAGTAATTAAACGAGATTTAAGACCTACCACAAACACTAAATCGTCTAAGCCATACCAAGTCTCCTCATCCCTGAAGTGAGTAAATTTAAGCGCAGTAAGAGCCTACCATCCAGTCCATATCTTAATGCATACGGTTATTGAAGGTGAGGGACAACAATTGTGGGGGTAGCACTCAGTGAATTATTCCTGGCATCTGGTTCCTAA…
M0815BC2	Thunnus obesus	CATATGTCTGCGCACGTACATATATGTAATTACACCATATCTATATATGGACCATATATAATAATGTTCTAGGACATATATGTATTAAAACCATTACTAGTACTAAACCATTCATATATCAACAAACAATGAAGACTTACATAAACCATACAAATATATCCCAACATTCAAATTAAGTCAAGTAATTAAACGAGATTTAAGACCTACCACAAACACTAAATCGTCTAAGCCATACCAAGTCTCCTCATCCCTGAAATCGAGTAAATTTATGCGCAGTAAGAACCTACCATCCAGTCCATATCTTAATGCATACGGTTATTGAAGGTGAGGGACAATAATTGTGGGGGTAGCACTCAGTGAATTATTCCTGGCATCTGGTTCCTAATTCATAAGG
M0815BC3	Thunnus albacares	ATGTCTACGCATGTACATATATGTAATTACACCATACTCATATATCGACCATATATAATAATGCTTTAGGACATATATGTATTAAAACCATTACTAGTACTAAACCATTCATATGTCAACAAACAATGAAGATTTACATAAACCATACAAATATATCTTAATATTCAATCTAAGTCGGGTAATTAAACGAGATTTAAGACCTACCATAACAACTAAATCGTCTAAGCCATACCAAGTATCCCCATTCCTAAAATCAGGTAAATTTAAGCGCAGTAAGAGCCTACCATCCAGTCCATATCTTAATGCATACGGTTATTGAAGGTGAGGGACAATGATTGTGGGGGTAGCACCTAGTGAATTATTCCTGGCATCTGGTTCCTAATTCAA
M0815BC4	Thunnus obesus	TGCCCATATTTCAATATGTCTACGCACGTACATATATGTAATTACACCATACTTATATATTAACCATATACAATAATGTTCTAGGACATATATGTATTAAAACCATTACTAGTATTAAACCATTCATATGTCAACAAACAATGAAGGTTTACATAAACCATACAGACATATCTCAACATCCACACTAAGTCAAGTAATTAAACGAGATTTAAGACCTACCACAAACACTAAATCGTCTAAGCCAAACCAAGTCCCATCATCTCTAAAGTCAAGTAAATTTAAGCGCAGTAAGAGCCTACCATCCAGTCCATATCTTAATGCATACGGTTATTGAAGGTGAGGGACAATAATTGTGGGGGTAACACTTAGTGAATTATTCCTGGCATCTGGTTCCTAATT…
M0815MD1	Thunnus thynnus	TGCGCGCATATTTCAATATGTCTGCGCATGTACATATATGTAATTACACCATATTCATATATAGACCATATACAATAATGTTTTAGGACATATATGTATTAAAACCATTACTAGTATTAAACCATTCATATGTCAATAAATAATGAAGATTTACATAAACCATATAAATAAATCTCAACATTCATCTTGAATTCAGGCGATTAAACGAGATTTAAGACCTAACATAAATCTAAATCGTCTAAGCCATACCAAGTCTCCTCATCTCTAACATCTCGTAAATTTAAGCGCAGTAAGAGCCTACCATCCAGTCCATTTCTTAATGCATACGGTTATTGAAGGTGAGGGACAATAATTGTGGGGGTAACACTTAGTGAACTATTCCTGGCATCTGGTTCCTAA…
M0815MD2	Thunnus thynnus	GCCCTGCGCATGTACATATATGTAATTACACCATATTCATATATAGACCATATACAATAATGTTTTAGGACATATATGTATTAAAACCATTACTAGTATTAAACCATTCATATGTCAATAAATAATGAAGATTTACATAAACCATACAAATAAGTCTCAACATTCATCTTGAATTCAGGCGATTAAACGAGATTTAAGACCTAACATAAATCTAAATCGTCTAAGCCATACCAAGTCTCCTCATCTCTAACATCTCGTAAATTTAAGCGCAGTAAGAGCCTACCATCCAGTCCATTTCTTAATGCATACGGTTATTGAAGGTGAGGGACAATAATTGTGGGGGTAACACTTAGTGAACTATTCCT
M0815MD3	Thunnus thynnus	GTGCGCGCACACTTTCATATGTCTGCGCATGTACATATATGTAATTACACCATATTCATATATAGACCATATATAATAATGTTTTAGGACATATATGTATTAAAACCATTACTAGTATTAAACCATTCATATGTCAATAAATAATGAAGATTTACATAAACCATACAAATAAACCTCAACATTCATCTTGAATTCAGGCGATTAAACGAGATTTAAGACCTAGCATAAATCTAAATCGTCTAAGCCATACCAAGTCTCCTCATCTCTGACATCTGCGTAAACTTAAGCGCAGTAAGAGCCTACCATCCAGTCCATTTCTTAATGCATACGGTTATTGAAGGTGAGGGACAATAATTGTGGGGGTAACACTTAGTGAATTATTCCTGGCATCTGGTTCCT…
M0815MD4	Thunnus thynnus	ATTTAATATGTCTGCGCATGTACATATATGTAATTACACCATATTCATATATAGACCATATATAATAATGTTTCAGGACATATATGTATTAAAACCATTACTAGTATTAAACCATTCATATGTCAATAAATAATGAAGATTTACATAAACCATACAAATAAACCTCAACATTCACCTTGAATTCAGGCGATTAAACGAGATTTAAGACCTAACATAAATCTAAATCGTCTAAGCCATACCAAGTCTCCTCATCTCTGACATCTCGTAAACTTAAGCGCAGTAAGAGCCTACCATCCAGTCCATTTCTTAATGCATACGGTTATTGAAGGTGAGGGACAATAATTGTGGGGGTAACACTTAGTGAATTAGTCCTGGCATCTGGTTCCTAATTCAA
M0815ML1	Thunnus obesus	TGTCTACGCACGTACATATATGTAATTACACCATACTTATATATTAACCATATACAATAATGTTCTAGGACATATATGTATTAAAACCATTACTAGTATTAAACCATTCATATATCAACAAACAATGAAGGTTTACATAAACCATACAGACATATCCCAACATCCATGCTAAGTCAAGTAACTAAACGAAACTTAAGACCTACCACAAACACTAAATCGTCTAAGCCAAACCAAGTCCCATCATCTCTAAAATCAAGTAAATTTAAGCGCAGTAAGAGCCTACCATCCAGTCCATATCTTAATGCATACGGTTATTGAAGGTGAGGGACAATAATTGTGGGGGTAACACTTAGTGAATTATTCCTGGCATCTGGTTCCTAATTCAAAAA
M0815ML2	Thunnus albacares	ATGTCTACGCATGTACATATATGTAATTACACCATACTCATATATCGACCATATATAATAATGCTTTAGGACATATATGTATTAAAACCATTACTAGTACTAAACCATTCATATGTCAACAAACAATGAAGATTTACATAAACCATACAAATATATCTTAATATTCAATCTAAGTCGGGTAATTAAACGAGATTTAAGACCTACCATAACAACTAAATCGTCTAAGCCATACCAAGTATCCCCATTCCTAAAATCAGGTAAATTTAAGCGCAGTAAGAGCCTACCATCCAGTCCATATCTTAATGCATACGGTTATTGAAGGTGAGGGACAATGATTGTGGGGGTAGCACCTAGTGAATTATTCCTGGCATCTGGTTCCTAATTCAA
M0815ML3	Thunnus obesus	CACATATTTAATATGTCTGCGCACGTACATATATGTAATTACACCATATCTATATATGAACCATATACAGTAATGTTCTAGGACATATATGTATTAAAACCATTACTAGTACTAAACCATTCATATATCAACAAACAATGAAGACTTACATAAACCATACAAATATATTCCAACATTCAAGTTAAGTCAAGTAATTAAACGAGATTTAAGACCTACCACAAACACTAAATCGTCTAAGCCATACCAAGTCTCCCCATCCCTGAAATCAAGTAAATTTAAGCGCAGTAAGAACCTACCATCCAGTCCATATCTTAATGCATACGGTTATTGAAGGTGAGGGACAATAATTGTGGGGGTAGCACTCAGTGAATTATTCCTGGCATCTGGTTCCTA
M0815ML4	Thunnus albacares	GCACACCTTAACACGTCTACGCACGTACATATATGCAATCACACCATACTCATATATCGACCATATATAATAATGCTTTAGGACATATATGTATTAAAACCATTACTAGTACTAAACCATTCATATGTCAACAAACAATGAAGATTTACATAAACCATACAAATATATCTCAATATTCAATCTAAGTCAAGTAATTAAACGAGATTTAAGACCTACCATAACAACTAAATCGTCTAAGCCATACCAAGTATCCTCATCCCTAAAGTCAGGTAAATTTAAGCGCAGTAAGAGCCTACCATCCAGTCCATATCTTAATGCATACGGTTATTGAAGGTGAGGGACAATGACTGTGGGGGTAGCACCTAGTGAATTATTCCTGGCATCTGGTTCCA
M0915BC1	Thunnus obesus	TCTTTGCTCCCCGTGCGCACATATTTCATATGTCTGCGCACGTACATATATGTAATTACACCATATCTATATATGAACCATATACAGTAATGTTCTAGGACATACATGTATTAAAACCATTACTAGTACTGAACCATTCATATATCAACAAACAATGAAGATTTACATAAACCATACAGATATATTCCAACATTCAAGTTAAGTCAGGTAATTAAACGAGATTTAAGACCTACCACAAACACTAAATCGTCTAAGCCATACCAAGTCTCCTCATCCCTGGAATCGAGTAAATTTAAGCGCAGTAAGAACCTACCATCCAGTCCATATCTTAATGCATACGGTTATTGAAGGTGAGGGACAATAATTGTGGGGGTAGCACCTAGTGAATTATTCCTGGCA…
M0915BC2	Thunnus thynnus	CGTGCGCGCATATTTCATATGTCTGCGCATGTACATATATGTAATTACACCATATTCATATATAGACCATATATAATAATGTTTTAGGACATATATGTATTAAAACCATTACTAGTATTAAACCATTCATATGTCAATAAATAATGAAGATTTACATAAACCATACAAATAAACCTCAACATTCATCCTGAATTCAGGCGATTAAACGAGATTTAAGACCTAACATAAACCTAAATCGTCTAAGCCACACCAAGTCTCCTCATCTCTGACATCTCGTAAACTTAAGCGCAGTAAGAGCCTACCATCCAGTCCATTTCTTAATGCATACGGTTATTGAAGGTGAGGGACAATGATTGTGGGGGTAACACTTAGTGAATTATTCCTGGCATCTGGTTCCTA…
M0915BC3	Thunnus obesus	AGCGCACATATTTCATATGTCTGCGCACGTACATATATGTAATTACACCATATCTATATATGAACCATATACAATAATGTTCTAGGACATATATGTATTAAAACCATTACTAGTACTAAACCATTCATATATCAACAAACAATGAAGACTTACATAAACCATACAGATATATTCCAACATTCAAGTTAAGTCAAGTAATTAAACGAGATTTAAGACCTACCACAAACACTAAATCGTCTAAGCCATACCAAGTCTCCTCATCCCTGAAATCGAGTAAATTTAAGCGCAGTAAGAACCTACCATCCAGTCCATATCTTAATGCATACGGTTATTGAAGGTGAGGGACAATAATTGTGGGGGTAGCACTCAGTGAATTATTCCTGGCATCTGGTTCCTAAT…
M0915BC4	Thunnus thynnus	GTGCGCGCATATTTCATATGTCTGCGCATGTACATATATGTAATTACACCATATTCATATATAGACCATATATAATAATGTTTTAGGACATATATGTATTAAAACCATTACTAGTATTAAACCATTCATATGTCAATAAATAATGAAGATTTACATAAACCATACAAATAAACCTCAACATTCATCCTGAATTCAGGCGATTAAACGAGATTTAAGACCTAGCATAAATCTAAATCGTCTAAGCCATACCAAGTCTCCTCATCTCTGACATCTACGTAAACTTAAGCGCAGTAAGAGCCTACCATCCAGTCCATTTCTTAATGCATACGGTTATTGAAGGTGAGGGACAATAATTGTGGGGGTAACACTTAGTGAATTATTCCTGGCATCTGGTTCCTA…
M0915MD1	Thunnus thynnus	TGCGCGCATATTTCATATGTCTGCGCATGTACATATATGTAATTACACCATATTCATATATAGACCATATATAATAATGTTTTAGGACATATATGTATTAAAACCATTACTAGTATTAAACCATTCATATGTCAATAAATAATGAAGATTTACATAAACCATACAAATAAGCCTCAACATTCATTTTGAATTCAGGCGATTAAACGAGATTTAAGACCTAACATAAATCTAAATCGTCTAAGTCATACCAAGTCTCCTCATCTCTAACATCTCGTAAACTTAAGCGCAGTAAGAGCCTACCATCCAGTCCATTTCTTAATGCATACGGTTATTGAAGGTGAGGGACAATAATTGTGGGGGTAACACTTAGTGAATTATTCCTGGCATCTGGTTCCTAAT…
M0915MD2	Thunnus thynnus	CGTACACCAAACACCTCCCGGAAAAAAGGGCGGAAAATCAAACGCTCGCGAGGAACATAGTATAACCATATTAACAAGACACATCAATAAGCCCCAGGAACATTGCATAAAACCTTTCCAGCACCAACCATTACACGCCAACAAACAACGAAGACCCACACAAACCATACAAACAAACCTCAACACCCATCCTGAATTCAGGCGATTAAACGAGATCTAAGACCTAACATAAATCTAAATCGTCTAAGCCATACCAAGCCTCCTCATCTCTGACATCTCGTAAACTTAAGCGCAGTAAGAACCTACCATCCAGTCCATTTCTTAATGCATACGGTTATTGAAGGTGAGGGACAATAATTGTGGGGGTAACACCTAGTGAATTATTCCTGGCATCTGGTT…
M0915MD3	Thunnus thynnus	GGTGCGCGCATATTTCATATGTCTGCGCATGTACATATATGTAATTACACCATATTCATATATAGACCATATATAATAATGTTTTAGGACATATATGTATTAAAACCATTACTAGTATTAAACCATTCATATGTCAATAAATAATGAAGATTTACATAAACCATACAAATAAACCTCAACATTCATCTTGAATTCAGGCGGTTAAACGAGATTTAAGACCTAACATAAATCTAAATCGTCTAAGCCATACCAAGTCTCCTCATCTCTGACATCTACGTAAACTTAAGCGCAGTAAGAGCCTACCATCCAGTCCATTTCTTAATGCATACGGTTATTGAAGGTGAGGGACAATAATTGTGGGGGTAACACTTAGTGAATTATTCCTGGCATCTGGTTCCT…
M0915MD4	Thunnus thynnus	AGCTCTATTAACTCATCCAGGATAAGGGGGCGGAACGGAGGAGGTAGAGAGGAAAAAAGCACAACATAAGATAAGAAGACATGAAAAAGGTCCCGGAACATCGCACCAAACCATTCCAGCACCAAACCCCCCACGCCAACAAACAACGAAGACCCACACAAACCACACAAACAAACCTCAGCACCCGTCCCGAACCCAGGCGATCAAACGAGACCCAAGACCCAACATAAACCCAAATCGTCTAAGCCATACCAAGCCTCCTCATCTCTGACATCTCGTAAACTTAAGCGCAGTAAGAGCCTACCATCCAGTCCATTTCTTAATGCATACGGTTATTGAAGGTGAGGGACAATAATTGTGGGGGTAACACTTAGTGAATTATTCCTGGCATCTGGTTCTA
M0915ML1	Thunnus albacares	CTACACCATACTCATATATCGACCATATATAATAATGCTTTAGGACATATATGTATTAAAACCATTACTAGTACTAAACCATTCATATGTCAACAAACAATGAAGATTTACATAAACCATACAGATATATCTTAATATTCAACCTAAGTCAAGTAATTAAACGAGATTTAAGACCTACCATAACAACTAAATCGTCTAAGCCATACCAAGTATCCTCATTCCTAAAGTCAAGTAAATTTAAGCGCAGTAAGAGCCTACCATCCAGTCCATATCTTAATGCATACGGTTATTGAAGGTGAGGGACAATGATTGTGGGGGTAACACCTAGTGAATTATTCCTGGCATCTGGTTCCTAATTCAAA
M0915ML2	Thunnus albacares	CACGCCGCACCACACGCAACCACACCCACCCCACACCGACACATCAACAACGCCCCAGGAACACACGCACCAAAACACCACTAGTACTAAACCACCCACACGCCAACAAACAACGAAGACCTACACAAACCACACACACACACCCCAACACCCAATCCAAGCCAAGTAATCAAACGAGATCTAAGATCTACCATAACAACTAAATCGTCTAAGCCATACCAAGCATCCTCATTCCTAAAATCAGGTAAATTTAAGCGCAGTAAGAGCCTACCATCCAGTCCATATCTTAATGCATACGGTTATTGAAGGTGAGGGACAATGATTGTGGGGGTAACACCTAGTGAATTATTCCTGGCATCTGGTTCTA
M0915ML3	Thunnus thynnus	TTGTTCCCCGTGCGCGCATATTTCATATGTCTGCGCATGTACATATATGTAATTACACCATATTCATATATAGACCATATATAATAATGTTTTAGGACATATATGTATTAAAACCATTACTAGTATTAAACCATTCATATGTCAATAAATAATGAAGATTTACATAAACCATACAAATAAACCTCAACATTCATCTTGAATTCAGGCGATTAAACGAGATTTAAGACCTAGCATAAATCTAAATCGTCTAAGCCATACCAAGTCTCCTCATCTCTGACATCTACGTAAACTTAAGCGCAGTAAGAGCCTACCATCCAGTCCATTTCTTAATGCATACGGTTATTGAAGGTGAGGGACAATAATTGTGGGGGTAACACTTAGTGAATTATTCCTGGCATC…
M0915ML4	Thunnus albacares	ACACGTCCACGCACGCACACACACGCAATCACACCATACTCATATATCGACCATATATAATAATGCTTTAGGACATATATGTATTAAAACCATTACTAGTACTAAACCATTCATATGTCAATAAACAATGAAGATTTACATAAACCATACAGATATATCTTAACATTCAACCTAAGTCAAGTAATTAGACGAGATTTAAGACCTACCATAACAACTAAATCGTCCAAGCCATACCAAGTATCCCCATTCCTAAAGTCGAGTAAACTTAAGCGCAGTAAGAACCTACCATCCAGTCCATATCTTAATGCATACGGTTATTGAAGGTGAGGGACAATGATTGTGGGGGTAACACCTAGTGAATTATTCCTGGCATCTGGTTC
M1015BC1	Thunnus thynnus	TATATATGTAATTACACCATATTCATATATAGACCATATATAATAATGTTTTAGGACATATATGTATTAAAACCATGACTAGTATTGAACCATTCATATGTCAATATATAATGAAGAATTACATAAACCATACAAATAAACCTCAACATTCATCCTGAATTCAGGCGATTAAACGAGATTTAAGACCTAACATAAACCTAAATCGTCTAAGCCACACCAAGTCTCCTCATCTCTGACATCTCGTAAACTTAAGCGCAGTAAGAGCCTACCATCCAGTCCATTTCTTAATGCATACGGTTATTGAAGGTGAGGGACAATGATTGTGGGGGTAACACTTAGTGAATTATTCCTGGCATCTGGTTCCTAATTCAAGAA
M1015BC2	Thunnus albacares	ATGTCTACGCATGTACATATATGTAATTACACCATACTCATATATCGACCATATATAATAATGCTTTAGGACATATATGTATTAAAACCATTACTAGTACTAAACCATTCATATGTCAACAAACAATGAAGATTTACATAAACCATACAAATATATCTTAATATTCAATCTAAGTCGGGTAATTAAACGAGATTTAAGACCTACCATAACAACTAAATCGTCTAAGCCATACCAAGTATCCCCATTCCTAAAATCAGGTAAATTTAAGCGCAGTAAGAGCCTACCATCCAGTCCATATCTTAATGCATACGGTTATTGAAGGTGAGGGACAATGATTGTGGGGGTAGCACCTAGTGAATTATTCCTGGCATCTGGTTCCTAATTCAA
M1015BC3	Thunnus obesus	GCCTGTCTACGCACGTACATATATGTAATTACACCATACTTATATATTAACCATATACAATAATGTTCTAGGACATATATGTATTAAAACCATTACTAGTATTAAACCATTCATATATCAACAAATAATGAAGGTTTACATAAACCATACAGACATATCCCAACATCCATACTAAGTCAAGTAATTAAACGAAACTTAAGACCTACCACAAACACTAAATCGTCTAAGCCAAACCAAGTCTCATCATCTCTAAAATCAAGTAAATTTAAGCGCAGTAAGAGCCTACCATCCAGTCCATATCTTAATGCATACGGTTATTGAAGGTGAGGGACAATAATTGTGGGGGTAACACTTAGTGAATTATTCCTGGCATCTGGTTCCTAATTCAACAA
M1015BC4	Thunnus albacares	ATGCGCACATATTTCATATGTCTACGCATGTACATATATGTAATTACACCATACTCATATATCGACCATATATAATAATGCTTTAGGACATATATGTATTAAAACCATTACTAGTACTAAACCATTCATATGTCAACAAATAATGAAGATTTACATAAACCATACAGATATATCTTAATATTCAACCTAAGTCAAGTAATTAGACGAGATTTAAGACCTAACATAACGACTAAATCGTCTAAGCCATACCAAGTACCCCCATCCCTAAAATCAAGTAAATTTAAGCGCAGTAAGAGCCTACCATCCAGTCCATATCTTAATGCATACGGTTATTGAAGGTGAGGGACAATGATTGTGGGGGTAACACTTAGTGAATTATTCCTGGCATCTGGTTCCTAAT
M1015MD1	Thunnus thynnus	TCGCGCATATTTCATATGTCTGCGCATGTACATATATGTAATTACACCATATTCATATATAGACCATATATAATAATGTTTTAGGACATATATGTATTAAAACCATTACTAGTATTAAACCATTCATATGTCAATAAATAATGAAGATTTACATAAACCATACGAATAAATTTCAACATTCATCTTGAATTCAGGCGATTAAACGAGATTTAAGACCTAACATAAATCTAAATCGTCTAAGCCATACCAAGTCTCCTCATCTCTGACATCTCGTAAACTTAAGCGCAGTAAGAGCCTACCATCCAGTCCATTTCTTAATGCATACGGTTATTGAAGGTGAGGGACAATAATTGTGGGGGTAGCACTTAGTGAATTATTCCTGGCATCTGGTTCCTAATT…
M1015MD2	Thunnus thynnus	GCAATGTTTCAGGACATACATGTATTAAAACCATTACTAGTATTAAACCATTCATATGCCAATAAATAATGAAGATTTACATAAACCATACAAATAAACCTCAACATTCATCTTGAATTCAAGCGATTAAACGAGATTTAAGACCTAACATAAATCTAAATCGTCTAAGCCACACCAAGTCTCCTCATCTCTGACATCTCGTAAACTTAAGCGCAGTAAGAGCCTACCATCCAGTCCATTTCTTAATGCATACGGTTATTGAAGGTGAGGGACAATAATTGTGGGGGTAACACTTAGTGAATTATTCCTGGCATCTGGTTCCT
M1015MD3	Thunnus thynnus	GCGCGCCTCCCCACACGTCCGCGCACGCACACACACGCAACCACACCACACCCACACACAAACCCACACAATAATGTTTTAGGACATATATGTATTAAAACCATTACTAGTATTAAACCATTCATATGTCAATAAATAATGAAGATTTACATAAACCATACAAATAAACTTCAACATTCATCTTGAATTCAGGCGATTAAACGAGATTTAAGACCTAACATAAATCTAAATCGTCTAAGCCATACCAAGTCTCCTCATCTCTGACATCTCGTAAACTTAAGCGCAGTAAGAGCCTACCATCCAGTCCATTTCTTAATGCATACGGTTATTGAAGGTGAGGGACAATAATTGTGGGGGTAACACTTAGTGAATTATTCCTGGCATCTGGTTCCTAAT
M1015MD4	Thunnus thynnus	TCGCGCATATTTCATATGTCTGCGCATGTACATATATGTAATTACACCATATTCATATATAGACCATATACAATAATGTTTTAGGACATATATGTATTAAAACCATTACTAGTATTAAACCATTCATATGTCAATAAATAATGAAGATTTACATAAACCATATAAATAAGTCTCAACATTCACCTTGAATTCAGGCGATTAAACGAGATTTAAGACCTAACATAAATCTAAATCGTCTAAGCCATACCAAGTCTCCTCATCTCTAACATCTCGTAAATTTAAGCGCAGTAAGAGCCTACCATCCAGTCCATTTCTTAATGCATACGGTTATTGAAGGTGAGGGACAATAATTGTGGGGGTAACACTTAGTGAACTATTCCTGGCATCTGGTTCCTAATT
M1015ML1	Thunnus albacares	TATGCGCACATATTTCATATGTCTACGCATGTACATATATGTAATTACACCATACTCATATATCGACCATATATAATAATGCTTTAGGACATATATGTATTAAAACCATTACTAGTACTAAACCATTCATATGTCAACAAACAATGAAGATTTACATAAACCATACAGATATATCTTAATATTCAATCTAAGTCAAGTAATTAAACGAGATTTAAGACCTACCATAACAACTAACTCGTCTAAGCCATACCAAGTATCCTCATTCCTAAAGTCAAGTAAATTTAAGCGCAGTAAGAGCCTACCATCCAGTCCATATCTTAATGCATACGGTTATTGAAGGTGAGGGACAATGATTGTGGGGGTAACACCTAATGAATTATTCCTGGCATCTGGTTCCTA…
M1015ML2	Thunnus albacares	CATATATAATAATGCTTTAGGACATATATGTATTAAAACCATTACTAGTACTAAACCATTCATATGTCAACAAACAATGAAGATTTACATAAACCATACAGATATATCTTAATATTCAATCTAAGTCAGGTAATTAAACGAGATTTAAGACCTACCACAATAACTAAATCGTCTAAGCCATACCAAGTATCCTCATTCCTAAAGCCAAGTAAATTTAAGCGCAGTAAGAGCCTACCATCCAGTCCATATCTTAATGCATACGGTTATTGAAGGTGAGGGACAATGATTGTGGGGGTAACACCTAGTGAATTATTCCTGGCATCTGGTTCCTAATT
M1015ML3	Thunnus obesus	TCGCACATATTTTAATATGTCTGCGCACGTACATATATGTAATTACACCATATCTATATATGGACCATATACAGTAATGTTCTAGGACATATATGTATTAAAACCATTACTAGTACTAAACCATTCATATATCAACAAACAATGAAGACTTACATAAACCATACAAATATATTCCGACATTCAAGTTAAGTCAAGTAATTAAACGAGATTTAAGACCTACCACAAACACTAAATCGTCTAAGCCATACCAAGTCTCCTCATCCCTGAAATCAAATAAATTTAAGCGCAGTAAGAGCCTACCATCCAGTCCATATCTTAATGCATACGGTTATTGAAGGTGAGGGACAATAATTGTGGGGGTAGCACCCAGTGAATTATTCCTGGCATCTGGTTCCTAAT…
M1015ML4	Thunnus obesus	AGCCCATATTTCATATGTCTACGCACGTACATATATGTAATTACACCATACTTATATATCAACCATATACAATAATGTTCTAGGACATATATGTATTAAAACCATTACTAGTATTAAACCATTCATATGTCAATAAACAATGAAGGTTTACATAAACCATACAGACATACCTCAGCATCCATACTAAGTCAAGTAATTAAACGAAATTTAAGACCTACCACAAACACTAAATCGTCTAAGCCATACCAAGTCCCACCATCTCTAAAATCAAGTAAATTTAAGCGCAGTAAGAGCCTACCATCCAGTCCATATCTTAATGCATACGGTTATTGAAGGTGAGGGACAATAATTGTGGGGGTAACACTTAGTGAATTATTCCTGGCATCTGGTTCCTAATTTC
M1114BC1	Thunnus thynnus	ATATGTAATTACACCATATTCATATATAGACCATATACAATAATGTTTTAGGACATATATGTATTAAAACCATTACTAGTATTAAACCATTCATATGTCAATAAATAATGAAGATTTACATAAACCATATAAATAAGCCTCAACATTCACCTTGAATTCAGGCGATTAAACGAGATTTAAGACCTAACATAAATCTAAATCGTCTAAGCCATACCAAGTCTCCTCATCTCTAACATCTCGTAAACTTAAGCGCAGTAAGAGCCTACCATCCAGTCCATTTCTTAATGCATACGGTTATTGAAGGTGAGGGACAATAATTGTGGGGGTAACACTTAGTGAACTATTCCTGGCATCTGGTTCCTAATT
M1114BC2	Thunnus thynnus	ATATGTAATTACACCATATTCATATATAGACCATATATAATAATGTTTTAGGACATATATGTATTAAAACCATTACTAGTATTAAACCATTCATATGCCAATAAATAATGAAGATTTACATAAACCATACAAATAAACCTCAACATTCACTTTGAATTCAGGCGATTAAACGAGATTTAAGACCTAACATAAACCTAAATCGTCTAAGCCATACCAAGTCTCCTCATCTCTGACATCTCGTAAACTTAAGCGCAGTAAGAGCCTACCATCCAGTCCATTTCTTAATGCATACGGTTATTGAAGGTGAGGGACAATAATTGTGGGGGTAACACTTAGTGAATTATTCCTGGCATCTGGTTCCTAATT
M1114BC3	Thunnus albacares	ATATGTAATTACACCATACTTATATATCGACCATATATAATAATGCTTTAGGACATATATGTATTAAAACCATTACTAGTACTAAACCATTCATATGTCAACAAACAATGAAGATTTACATAAACCATACAGATATATCTCAATATTCAATCTAAGTCAAGTAATTAAACGAGATTTAAGACCTACCATAACAACTAAATCGTCTAAGCCATACCAAGTATCCTCATCTCTAGAGTCAGGTAAATTTAAGCGCAGTAAGAGCCTACCATCCAGTCCATATCTTAATGCATACGGTTATTGAAGGTGAGGGACAATGATTGTGGGGGTAACACCTAGTGAATTATTCCTGGCATCTGGTTCCTAATT
M1114BC4	Thunnus albacares	ATATGTAATTACACCATACTCATATATGGACCATATATAATAATGCTTTAGGACATACATGTATTAAAACCATTACTAGTACTAAACCATTCATATATCAACAAATAATGAAGATTTACATAAACCATACAGGTATATCTTAATATTCAATCTAAGTCAAGTAATTAAACGAGATTTAAGACCTACCATAACAACTAAATCGTCTAAGCCATACCAAGTATCCCCATTCCTAAAGTCAGGTAAATTTAAGCGCAGTAAGAGCCTACCATCCAGTCCATATCTTAATGCATACGGTTATTGAAGGTGAGGGACAATGATTGTGGGGGTAACACCTAGTGAATTATTCCTGGCATCTGGTTCCTAATT
M1114MD1	Thunnus thynnus	ATATGTAATTACACCATATTCATATATAGACCATATATAATAATGTTTTAGGACATATATGTATTAAAACCATTACTAGTATTAAACCATTCATATGTCAATAAATAATGAAGATTTACATAAACCATACAAATAAACCTCAACATTCATCTTGAATTCAGGCGATTAAACGAGATTTAAGACCTAGCATAAATCTAAATCGTCTAAGCCATACCAAGTCTCCTCATCTCTGACATCTACGTAAACTTAAGCGCAGTAAGAGCCTACCATCCAGTCCATTTCTTAATGCATACGGTTATTGAAGGTGAGGGACAATAATTGTGGGGGTAACACTTAGTGAATTATTCCTGGCATCTGGTTCCTAATTCA
M1114MD2	Thunnus albacares	ATATGTAATTACACCATATTCATATATCGACCATATATAATAATGCTTTAGGACATATATGTATTAAAACCATTACTAGTACTAAACCATTCATATGTCAACAAACAATGAAGATTTACATAAACCATACAGATATATCTTAACATTCAACCTAAGTCAAGTAATTAGACGAGATTTAAGACCTACCATAATAACTAAATCGTCTAAGCCATACCAAGTATCCCCATTCCTAAAGTCAAGTAAATTTAAGCGCAGTAAGAGCCTACCATCCAGTCCATATCTTAATGCATACGGTTATTGAAGGTGAGGGACAATGATTGTGGGGGTAACACCTAGTGAACTATTCCTGGCATCTGGTTCCTAATT
M1114MD3	Thunnus albacares	ATATGTAATTACACCATACTCATATATCGACCATATATAATAATGCTTTAGGACATACATGTATTAAAACCATTACTAGTACTAAACCATTCATATGTCAACAAACAATGAAGACTTACATAAACCATACAGATATATCTTAACATTCAACCTAAGTCAAGTAATTAAACGAGATTTAAGACCTACCATAACAACTAAATCGTCTAAGCCATACCAAGTATCCCCATTCCTAAAGTCAGGTAAATTTAAGCGCAGTAAGAACCTACCATCCAGTCCATATCTTAATGCATACGGTTATTGAAGGTGAGGGACAATGATTGTGGGGGTAACACCTAGTGAATTATTCCTGGCATCTGGTTCCTAATT
M1114MD4	Thunnus thynnus	ATATGTAATTACACCATATTCATATATAGACCATATATAATAATGTTTTAGGACATATATGTATTAAAACCATTACTAGTATTAAACCATTCATATGTCAATAAATAATGAAGATTTACATAAACCATACAAGTAAGCCTCAACATTCACCTTGAATTCAAGCGATTAAACGAGATTTAAGACCTAACATAAATCTAAATCGTCTAAGCCATACCAAGTCTCCTCATCTCTGACATCTCGTAAACTTAAGCGCAGTAAGAACCTACCATCCAGTCCATTTCTTAATGCATACGGTTATTGAAGGTGAGGGACAATAATTGTGGGGGTAACACTTAGTGAATTATTCCTGGCATCTGGTTCCTAATTCA
M1114ML1	Thunnus albacares	ATATGTAATTACACCATACTCATATATCGACCATATATAATAATGCTTTAGGACATATATGTATTAAAACCATTACTAGTACTAAACCATTCATATGTCAACAAACAATGAAGATTTACATAAACCATACAAATATATCTTAATATTCAACCTAAGTCAAGTAATTAGACGAGATTTAAGACCTACCATAACAACTAAATCGTCTAAGCCATACCAAGTATCCCCATCCCTAAAGTCAAGTAAATCTAAGCGCAGTAAGAGCCTACCATCCAGTCCATATCTTAATGCATACGGTTATTGAAGGTGAGGGACAATGATTGTGGGGGTAACACCTAGTGAATTATTCCTGGCATCTGGTTCCTAATT
M1114ML2	Thunnus albacares	ATATGTAATTACACCATACTCATATATCGACCATATATAATAATGCTTTAAGACATATATGTATTAAAACCATTACTAGTACTAAACCATTCATATGTCAACAAACAATGAAGATTTACATAAACCATACATGTATATCTTAATATTTAATCTAAGTCAAGTAATTAAACGAGATTTAAGACCTACCATAACAACTAAATCGTCTAAGCCATACCAAGTATCCTCATTCCTAAAGTCAAGCAAATTTAAGCGCAGTAAGAGCCTACCATCCAGTCCATATCTTAATGCATACGGTTATTGAAGGTGAGGGACAATGATTGTGGGGGTAACACCTAGTGAATTATTCCTGGCATCTGGTTCCTAATT
M1114ML3	Thunnus obesus	ATAATGTTCTAGGACATATATGTATTAAAACCATTACTAGTACTAAACCATTCATATATCAACAAACAATGAAGACTTACATAAACCATACAGATATATTCCAACATTCAAATTAAGTCAAGTAATTAAACGAGATTTAAGACCTACCACAAACACTAAATCGTCTAAGCCATACCAAGTCCCCTCATCCCTGAAATCGAGTAAATTTAAGCGCAGTAAGAACCTACCATCCAGTCCATATCTTAATGCATACGGTTATTGAAGGTGAGGGACAATAATTGTGGGGGTAGCACTCAGTGAATTATTCCTGGCATCTGGTTCCTAATTCAA
M1114ML4	Thunnus albacares	ATATGTAATTACACCATACTCATATATCGACCATATATAATAATGCTTTAGGACATATATGTATTAAAACCATTACTAGTACTAAACCATTCATATGTCAACAAACAATGAAGATTTACATAAACCATACAGATATATCTTAACATTCAATCTAAGTCAAGTAATTAAACGAGATTTAAGACCTACCATAATAACTAAATCGTCTAAGCCATACCAAGTACCCCCATCCCTAAAGTCAGGTAAATTTAAGCGCAGTAAGAGCCTACCATCCAGTCCATATCTTAATGCATACGGTTATTGAAGGTGAGGGACAATGATTGTGGGGGTAACACCTAGTGAATTATTCCTGGCATCTGGTTCCTAATTCAA
M1214BC1	Thunnus albacares	ATATGTAATTACACCATACTCATATATCGACCATATATAATAATGCTTTAGGACATATATGTATTAAAACCATTACTAGTACTAAACCATTCATATGTCAACAAACAATGAAGATTTACATAAACCATACAGATATATCTTAATATTCAATCTAAGTCAAGTAATTAAACGAGATTTAAGACCTACCATAATAACTAAATCGTCTAAGCCATACCAAGTATCCTCATTCCTAAAGTCAGGTAAATTTAAGCGCAGTAAGAACCTACCATCCAGTCCATATCTTAATGCATACGGTTATTGAAGGTGAGGGACAATGATTGTGGGGGTAACACCTAGTGAACTATTCCTGGCATCTGGTTCCTAATT
M1214BC2	Thunnus albacares	ATATGTAATTACACCATACTCATATATCGACCATATATAATAATGCTTTAGGACATATATGTATTAAAACCATTACTAGTACTAAACCATTCATATGTCAACAAACAATGAAGATTTACATAAACCATACAAATATATCTTAATATTCAATCTAAGTCAAGTAATTAGACGAGATTTAAGACCTACCATAATAACTAAATCGTCTAAGCCATACCAAGTATCCCCATTCCTAAAGTCAAGTAAATTTAAGCGCAGTAAGAGCCTACCATCCAGTCCATATCTTAATGCATACGGTTATTGAAGGTGAGGGACAATAATTGTGGGGGTAACACCTAGTGAATTATTCCTGGCATCTGGTTCCTAATTCAA
M1214BC3	Thunnus albacares	ATATGTAATTACACCATACTCATATATAGACCATATATAATAATGCTTTAGGACATATATGTATTAAAACCATTACTAGTACTAAACCATTCATATGTCAACAAACAATGAAGATTTACATAAACCATACAGATATATCTTAATACTCAGTCTAAGTCAAGTAATTAAACGAGATTTAAGACCTACCATAACAACTAAATCGTCTAAGCCATACCAAGTATCCCCATTCCTAAAGTCAGGTAAATTTAAGCGCAGTAAGAGCCTACCATCCAGTCCATATCTTAATGCATACGGTTATTGAAGGTGAGGGACAATGATTGTGGGGGTAACACCTAGTGAATTATTCCTGGCATCTGGTTCCTAATT
M1214BC4	Thunnus thynnus	ATATGTAATTACACCATATTCATATATAGACCATATATAATAATGTTTTAGGACATATATGTATTAAAACCATTACTAGTATTAAACCATTCATATGTCAATAAATAATGAAGATTTACATAAACCATACAAATAAACCTCAACATTCATCTTGAATTCAAGCGATTAAACGAGATTTAAGATCTAACATAAATCTAAATCGTCTAAGCCATACCAAGTCTCCTCATCTCTGACATCTCGTAAACTTAAGCGCAGTAAGAGCCTACCATCCAGTCCATTTCTTAATGCATACGGTTATTGAAGGTGAGGGACAATAATTGTGGGGGTAACACTTAGTGAATTATTCCTGGCATCTGGTTCCTAATTCA
M1214MD1	Thunnus thynnus	ATATGTAATTACACCATATTCATATATAGACCATATATAATAATGTTTTAGGACATATATGTATTAAAACCATTACTAGTATTAAACCATTCATATGTCAATAAATAATGAAGATTTACATAAACCATACAAATAAACCTCAGCATTCGTCTTGAATTCAGGCGATTAAACGAGATTTAAGATCTAACATAAATCTAAATCGTCTAAGCCATACCAAGTCTCCTCATCTCTGACATCTCGTAAACTTAAGCGCAGTAAGAGCCTACCATCCAGTCCATTTCTTAATGCATACGGTTATTGAAGGTGAGGGACAATAATTGTGGGGGTAACACTTAGTGAATTATTCCTGGCATCTGGTTCCTAATTCAA
M1214MD2	Thunnus albacares	ATATGTAATTACACCATACTCATATATCGACCATATATAATAATGCTTTAGGACATATATGTATTAAAACCATTACTAGTACTAAACCATTCATATGTCAACAAACAATGAAGATTTACATAAACCATACATATATATCTTAATATTCAATCTAAGTCAAGTAATTAAACGAGATTTAAGACCTACCATAATAACTAAATCGTCTAAGCCATACCAAGTATCCTCATTCCTAAAGTCAAGCAAATTTAAGCGCAGTAAGAGCCTACCATCCAGTCCATATCTTAATGCATACGGTTATTGAAGGTGAGGGACAATAATTGTGGGGGTAACACCTAGTGAATTATTCCTGGCATCTGGTTCCTAAT
M1214MD3	Thunnus albacares	ATATGTAATTACACCATACTCATATATCGACCATATATAATAATGCTTTAGGACATACATGTATTAAAACCATTACTAGTACTAAACCATTCATATGTCAACAAACAATGAAGATTTACATAAACCATACAAATATATCTTAATATTCAATCTAAGTCGAGTAATTAAACGAGATTTAAGACCTACCATAACAACTAAATCGTCTAAGCCATACCAAGTATCCCCATTCCTAAAATCAGGTAAATTTAAGCGCAGTAAGAGCCTACCATCCAGTCCATATCTTAATGCATACGGTTATTGAAGGTGAGGGACAATGATTGTGGGGGTAGCACCTAGTGAATTATTCCTGGCATCTGGTTCCTAATT
M1214MD4	Thunnus albacares	ATATGTAATTACACCATACTCATATATCGACCATATATAATAATGCTTTAGGACATATATGTATTAAAACCATTACTAGTACTAAACCATTCATATGTCAATAAACAATGAAGATTTACATAAACCATACAGATATATCTTAACATTCAGCCTAAGTCAAGTAATTAGACGAGATTTAAGACCTACCATAACAACTAAATCGTCTAAGCCATACCAAGTATCCCCATTCCTAAAGTCGAGTAAATTTAAGCGCAGTAAGAACCTACCATCCAGTCCATATCTTAATGCATACGGTTATTGAAGGTGAGGGACAATGATTGTGGGGGTAACACCTAGTGAATTATTCCTGGCATCTGGTTCCTAATT
M1214ML1	Thunnus obesus	ATATGTAATTACACCATATCTATATATAGACCATATACAGTAATGTTCTAGGACATATATGTATTAAAACCATTACTAGTACTAAACCATTCATATATCAACAAACAATGAAGACTTACATAAACCATACAGATATATTCCAACATTCAAATTAAGTCAAGTAATTAAACGAGATTTAAGACCTACCACAAGCACTAAATCGTCTAAGCCATACCAAGTCTCCTCATCCCTGAAATCAAGTAAATTTAAGCGCAGTAAGAACCTACCATCCAGTCCATATCTTAATGCATACGGTTATTGAAGGTGAGGGACAACAATTGTGGGGGTAGCACTCAGTGAATTATTCCTGGCATCTGGTTCCTAATTCA
M1214ML2	Thunnus albacares	ATATGTAATTACACCATACTCATATATCGACCATATATAATAATGCTTTAGGACATATATGTATTAAAACCATTACTAGTACTAAACCATTCATATGTCAACAAACAATGAAGATTTACATAAACCATACATGTATATCTTAATATTTAATCTAAGTCAGGTAATTGAACGAGATTTAAGACCTACCATAACAACTAAATCGTCTAAGCCATACCAAGTATCCTCATTCCTAAAGTCAAGCAAATTTAAGCGCAGTAAGAGCCTACCATCCAGTCCATATCTTAATGCATACGGTTATTGAAGGTGAGGGACAATGATTGTGGGGGTAACACCTAGTGAATTATTCCTGGCATCTGGTTCCTAATTCAA
M1214ML3	Thunnus thynnus	TAGGACATATATGTATTAAAACCATTACTAGTACTAAACCATTCATATGTCAATAAATAATGAAGATTTACATAAACCATACAAATAAACCTCAACATTCATTTTGAATTCAGGCGATTGAACGAGATTTAAGACCTAACATAAACCTAAATCGTCTAAGCCATACCAAGTCTCCTCATCTCTGACATCTCGTAAACTTAAGCGCAGTAAGAGCCTACCATCCAGTCCATTTCTTAATGCATACGGTTATTGAAGGTGAGGGACAATGATTGTGGGGGTAACACTTAGTGAATTATTCCTGGCATCTGGTTCCTAATTCA
M1214ML4	Thunnus obesus	CCATATCTATATATGGACCATATACAATAATGTTCTAGGACATATATGTATTAAAACCATTACTAGTACTAAACCATTCATATATCAACAAACAATGAAGACTTACATAAACCATACAGATATATTCCAACATTCAAATTAAGTCAGGTAATTAAACGAGATTTAAGACCTACCACAAACACTAAATCGTCTAAGCCATACCAAGTCTCCTCATTCCTGAAATCGAGTAAATTTAAGCGCAGTAAGAACCTACCATCCAGTCCATATCTTAATGCATACGGTTATTGAAGGTGAGGGACAACAATTGTGGGGGTAGCACTTAGTGAATTATTCCTGGCATCTGGTTCCTAATT
P0115B20	Thunnus albacares	ATATGTAATTACACCATACTCATATATGGACCATATATAATAATGCTTTAGGACATATATGTATTAAAACCATTACTAGTACTAAACCATTCATATATCAACAAACAATGAAGATTTACATAAACCATACAGGTATATCTTAATATTCAACCTAAGTCAAGTAATTAAACGAGATTTAAGACCTACCATAACAACTAAATCGTCTAAGCCATACCAAGTATCCTCATTCCTAAAGTCAGGTAAATTTAAGCGCAGTAAGAGCCTACCATCCAGTCCATATCTTAATGCATACGGTTATTGAAGGTGAGGGACAATGATTGTGGGGGTAACACCTAGTGAATTATTCCTGGCATCTGGTTCCTAATTCAA
P0115B30	Thunnus obesus	ATATGTAATTACACCATATCTATATATGAACCATATACAGTAATGTTCTAGGACATATATGTATTAAAACCATTACTAGTACTAAACCATTCATATATCAACAAACAATGAAGACTTACATAAACCATACAGACATATTCCAACATTCAAATTAAGTCAGGTAATTAAACGAAATTTAAGACCTACCACAAATACTAAATCGTCTAAGCCATACCAAGTCTCCTCATCCCTGAAATCGAGTAAATTTAAACGCAGTAAGAGCCTACCATCCAGTCCATATCTTAATGCATACGGTTATTGAAGGTGAGGGACAATAATTGTGGGGGTAGCACTCAGTGAATTATTCCTGGCATCTGGTTCCTAATTCAA
P0115B40	Thunnus thynnus	ATATGTAATCACACCATATTCTATATAGACCATATATAATAATGTTTTAGGACATATATGTATTAAAACCATTACTAGTATTAAACCATTCATATGTCAATAAATAATGAAGATTTACATAAACCATACAAATAAACCTCAACATTCGTCTTGAATTCAGGCGATTAAACGAGATTTAAGACCTAACATAAATCTAAATCGTCTAAGCCATACCAAGTCTCCTCATCTCTGACATCTCGTAAACTTAAGCGCAGTAAGAGCCTACCATCCAGTCCATTTCTTAATGCATACGGTTATTGAAGGTGAGGGACAATAATTGTGGGGGTAACACTTAGTGAATTATTCCTGGCATCTGGTTCCTAATTCTGC
P0115G20	Thunnus thynnus	ATATGTAATTACACCATATTCATATATAGACCATATATAATAATGTTTTAGGACATATATGTATTAAAACCATTACTAGTATTAAACCATTCATATGTCAATAAATAATGAAGATTTACATAAACCATACAAATAAACCTCAGCATTCGTCTTGAATTCAGGCGATTAAACGAGATTTAAGACCTAACATAAATCTAAATCGTCTAAGCCATACCAAGTCTCCTCATCTCTGACATCTCGTAAACTTAAGCGCAGTAAGAGCCTACCATCCAGTCCATTTCTTAATGCATACGGTTATTGAAGGTGAGGGACAATAATTGTGGGGGTAACACTTAGTGAATTATTCCTGGCATCTGGTTCCTAATTCAA
P0115G30	Thunnus albacares	ATATGTAATTACACCATACTCATATATCGACCATATATAATAATGCTTTAGGACATATATGTATTAAAACCATTACTAGTACTAAACCATTCATATGTCAACAAACAATGAAGATTTACATAAACCATACAGATATATCTTAATATTCACTCTAAGTCAAGTAATTAAACGAGATTTAAGACCTACCATAACAACTAAATCGTCTAAGCCATACCAAGTATCCTCATTCCTAAAGTCAGGTAAATTTAAGCGCAGTAAGAGCCTACCATCCAGTCCATATCTTAATGCATACGGTTATTGAAGGTGAGGGACAATGATTGTGGGGGTAACACCTAGTGAATTATTCCTGGCATCTGGTTCCTAATTCA
P0115G40	Thunnus obesus	ATATGTAATTACACCATATCTATATATGGACCATATACAATAATGTTCTAGGACATATATGTATTAAAACCATTACTAGTACTAAACCATTCATATATCAACAAACAATGAAGACTTACATAAACCATACAGATATATTCCAACATTCAAATTAAGTCAGGTAATTAAACGAGATTTAAGACCTACCACAAACACTAAATCGTCTAAGCCATACCAAGTCTCCTCATCCTTGAAATCGAGTAAATTTAAGCGCAGTAAGAACCTACCATCCAGTCCATATCTTAATGCATACGGTTATTGAAGGTGAGGGACAACAATTGTGGGGGTAGCACTTAGTGAATTATTCCTGGCATCTGGTTCCTAATTCAA
P0115T20	Thunnus albacares	ATATGTAATTACACCATACTCATATATCGACCATATATAATAATGCTTTAGGACATATATGTATTAAAACCATTACTAGTACTAAACCATTCATATGTCAACAAACAATGAAGATTTACATAAACCATACAGATATATCTCAACATTCAAGCTAAGTCAAGTAATTAGACGAGATTTAAGACCTACCATAACAACTAAATCGTCTAAGCCACACCAAGTATCCCCATTCCTAAAGTCAAGTAAATTTAAGCGCAGTAAGAACCTACCATCCAGTCCATATCTTAATGCATACGGTTATTGAAGGTGAGGGACAATGATTGTGGGGGTAACACCTAGTGAATTATTCCTGGCATCTGGTTCCTAATT
P0115T30	Thunnus albacares	ATATGTAATTACACCATATTCATATATAGACCATATATAATAATGTTTTAGGACATATATGTATTAAAACCATAACTAGTATTAAACCATTCATATGTCAACAAACAATGAAGATTTACATAAACCATACGAATATATTCTAACATTTAAATTAAGTCAAGTAATTAAACGAGATTTAAGACCTACCATAAACACTAAATCGTCTAAGCCATACCAAGTCCCCCCATCTCTGAAATCAAGTAAATTTAAGCGCAGTAAGAGCCTACCATCCAGTCCATATCTTAATGCATACGGTTATTGAAGGTGAGGGACAATAATCGTGGGGGTAACACCTAGTGAATTATTCCTGGCATCTGGTTCCTAATT
P0115T40	Thunnus albacares	ATATGTAATTACACCATACTCATATATCGACCATATATAATAATGCTTTAGGACATATATGTATTAAAACCATTACTAGTACTAAACCATTCATATGTCAACAAACAATGAAGATTTACATAAACCATACAGATATATCTCAACATTCAAGCTAAGTCAAGTAATTAGACGAGATTTAAGACCTACCATAACAACTAAATCGTCTAAGCCACACCAAGTATCCCCATTCCTAAAGTCAAGTAAATTTAAGCGCAGTAAGAACCTACCATCCAGTCCATATCTTAATGCATACGGTTATTGAAGGTGAGGGACAATGATTGTGGGGGTAACACCTAGTGAATTATTCCTGGCATCTGGTTCCTAATT
P0215B10	Thunnus thynnus	CGTTCTAATTAACATTCTTTGTTCACCGTGCGCGCATATTTCATATGTCTGCGCATGTACATATATGTAATTACACCATATTCATATATAGACCATATACAATAATGTTTTAGGACATATATGTATTAAAACCATTACTAGTATTAAACCATTCATATGTCAATAAATAATGAAGATTTACATAAACCATATAAATAAGCCTCAACATTCACCTTGAATTCAGGCGATTAAACGAGATTTAAGACCTAACATAAATCTAAATCGTCTAAGCCATACCAAGTCTCCTCATCTCTAACATCTCGTAAACTTAAGCGCAGTAAGAGCCTACCATCCAGTCCATTTCTTAATGCATACGGTTATTGAAGGTGAGGGACAATAATTGTGGGGGTAACACTTAGT…
P0215B30	Thunnus thynnus	CGATCTATAAACTTTCTTTGTTCACCTGCGCAGATATTTACAATATGTCTGTGCATGTACATATATGTAATTACACCATAACTATATTTAAAACATAAATAATAATGCTTTGAGACATATATGTATTACAACCATAACTAGTACTTAACCACTCATATGTCAACATATCATGAAGACTTACATAAAGCATGACAATTATCTTTCAACATCCTACCTACATCACGTAATTAAACGAGATTTAAGACCTACCATAAACCTAAATCGTCTAAGCCATACCAAGTCCCCTCATCTCTGAAATCTAGTAAACTTAAGCGCAGTAAGAGCCTACCATCCAGCTCATTTCTTAATGCATACGGTTATTGAAGGTGAGGGACAATAATTGTGGGGGTAACACTTAGT…
P0215B40	Thunnus thynnus	AGATCTATTAACTTTCTTTGTTCCCCGTGCGCGCATATTTCATATGTCTGCGCATGTACATATATGTAATTACACCATATTCATATATAGACCATATATAATAATGTTTTAGGACATGTATGTATTAAAACCATTACTAGTATTAAACCATTCATATGTCAATAAATAATGAAGATTTACATAAACCATACAAATAAGCCTCAACATTCATCTTGAATTCAGGCGATTAAACGAGATTTAAGACCTAACATAAATCTAAATCGTCTAAGCCACACCAAGTCTCCTCATCTCTGACATCTCGTAAACTTAAGCGCAGTAAGAGCCTACCATCCAGTCCATTTCTTAATGCATACGGTTATTGAAGGTGAGGGACAATAATTGTGGGGGTAACACTTAGTG…
P0215G20	Thunnus albacares	GGAAGAATTAACATTCTTTGTTCCTTATGCGCACATATTTCATATGTCTACGCATGTACATATATGTAATTACACCATACTCATATATCGACCATATATAATAATGCTTTAGGACATATATGTATTAAAACCATTACTAGTACTAAACCATTCATATGTCAACAAATAATGAAGATTTACATAAACCATACAGATATATCTTAATATTCAATCTAAGTCAAGTAATTAAACGAGATTTAAGACCTACCATAACAACTAAATCGTCTAAGCCATACCAAGTATCCTCATTCCTAAAGTCAGGTAAATTTAAGCGCAGTAAGAGCCTACCATCCAGTCCATATCTTAATGCATACGGTTATTGAAGGTGAGGGACAATGATTGTGGGGGTAACACCTAGTG…
P0215G30	Thunnus albacares	TCGGCTTGATTGTTTGTTCCCTATGCGCACATATTTCATATGTCTACGCATGTACATATATGTAATTACACCATACTCATATATCGACCATATATAATAATGCTTTAGGACATATATGTATTAAAACCATTACTAGTACTAAACCATTCATATGTCAATAAACAATGAAGATTTACATAAACCATACAGATATATCTTAATATTCAATCTAAGTCAAGTAATTAGACGAGATTTAAGACCTACCATAATAACTAAATCGTCTAAGCCATACCAAGTATCCCCATTCCTAAAGTCAGGTAAACTTAAGCGCAGTAAGAGCCTACCATCCAGTCCATATCTTAATGCATACGGTTATTGAAGGTGAGGGACAATGATTGTGGGGGTAACACCTAGTGAATT…
P0215G40	Thunnus albacares	CAGAATCTAATAAACTTTGCTTTGTTCACTATGCGCACATATTTTAATATGTCTACGCATGTACATATATGTAATTACACCATACTCATATATCGACCATATATAATAATGCTTTAGGACATATATGTATTAAAACCATTGCTAGTACTAAACCATTCATATGTCAACAAACAATGAAGATTTACATAAACCATGCAGATATATCTTAATATTCAACCTAAGTCAAGTAATTAGACGAGATTTAAGACCTACCATAACAACTAAATCGTCTAACACTACCAAGTATCCCCATTCCTAAAGTCGGGTAAATCTCACCC
P0215T10	Thunnus albacares	CAGAATCTAATTAACCATTCTTTGTTCCCTATGCGCACATATTTCATATGTCTACGCATGTACATATATGTAATTACACCATACTCATATATCGACCATATATAATAATGCTTTAGGACATATATGTATTAAAACCATTACTAGTACTAAACCATTCATATGTCAACAAACAATGAAGATTTACATAAACCATACAAATATATCTTAATATTCAATCTAAGTCAAGTAATTAAACGAGATTTAAGACCTACCATAACAACTAAATCGTCTAAGCCATACCAAGTATCCCCATTCCTAAGATCAGGTAAATTTAAGCGCAGTAAGAGCCTACCATCCAGTCCATATCTTAATGCATACGGTTATTGAAGGTGAGGGACAATGATTGTGGGGGTAACACCT…
P0215T20	Thunnus albacares	AAGCATCGATTCACGATTCTTTGTTCCCCTGCGCACATATTTCATATGTCTACGCATGTACATATATGTAATTACACCATACTCATATATCGACCATATATAATAATGCTTTAGGACATATATGTATTAAAACCATTACTAGTACTAAACCATTCATATGTCAACAAACAATGAAGATTTACATAAACCATACATATATATCTTAACATTTAACCTAAGTCAAGTAATTAAACGAGATTTAAGACCTACCATAACAACTAAATCGTCTAAGCCATACCAAGTATCCTCATCCCTAAAGTCAAGCAAATTTAAGCGCAGTAAGAGCCTACCATCCAGTCCATATCTTAATGCATACGGTTATTGAAGGTGAGGGACAATAATTGTGGGGGTAGCACCTAG…
P0215T30	Thunnus albacares	TTGTTCACTATGCGCACATATTTCAATATGTCTACGCATGTACATATATGTAATTACACCATACTCATATATCAACCATATATAATAATGCTTTAGGACATATATGTATTAAAACCATTACTAGTACTAAACCATTCATATGTCAACAAACAATGAAGATTTACATAAACCATACAGGTATATCTTAACATTCAATCTAAGTCAGGTAATTAAACGAGATTTAAGACCTACCATAACAACTAAATCGTCTAAGCCATACCAAGTATCCTCATTCCTAAAGTCGGGTAAATTTAAGCGCAGTAAGAGCCTACCATCCAGTCCATATCTTAATGCATACGGTTATTGAAGGTGAGGGACAATGATTGTGGGGGTAACACCTAGTGAATTATTCCTGGCATC…
P0215T40	Thunnus albacares	CTGAATCTAATTAAACATTCTTTGTTCCCCTGCGCACATATTTCATATGTCTACGCATGTACATATATGTAATTACACCATACTCATATATCGACCATATATAATAATGCTTTAGGACATATATGTATTAAAACCATTACTAGTACTAAACCATTCATATGTCAACAAACAATGAAGATTTACATAAACCATACATATATATCTTAATATTTAATCTAAGTCAAGTAATTAAACGAGATTTAAGACCTACCATAACAACTAAATCGTCTAAGCCATACCAAGTATCCTCATTCCTAAAGTCAAGCAAATTTAAGCGCAGTAAGAGCCTACCATCCAGTCCATATCTTAATGCATACGGTTATTGAAGGTGAGGGACAATGATTGTGGGGGTAGCACCTA…
P0315B10	Thunnus albacares	ACAAATTAACATTCTTTGTTCCCTATGCGCACACACAATAAAACGACAACGCAAGAACAAAAAAGCAAACACACCAAACACAAAAAACGACCAAAAAAAAAAAAGCACAAGGACAAAAAAGCAAAAAAACCAAAACAAGAACAAAACCAAACACAAGACAACAAACAACGAAGACAAACACAAACCAAACAGAAACACCCAAATACCCAACCCAAGACAAGAAATCAAACGAGAACTAAGACCTACCATAACAACTAAATCGTCTAAGCCATACCAAGAATCCCCATACCTAAAGACAGGTAAATATAAGCGCAGTAAGAGCCTACCATCCAGTCCATATCTTAATGCATACGGTTATTGAAGGTGAGGGACAATGATTGTGGGGGTAACACCTAGTGA…
P0315B20	Thunnus thynnus	CGTGCGCGCATATTTCATATGTCTGCGCATGTACATATATGTAATCACACCATACTCATATATAGACCATATATAATAATGTTTTAGGACATATATGTATTAAAACCATTACTAGTATTAAACCATTTATATGTCAATAAATAATGAAGATTTACATAAACCATACAAATAAACCTCAACATTCATTTTGAATTCAGGCGATTAAACGAGATTTAAGACCTAACATAAATCTAAATCGTCTAAGCCATACCAAGTCTCCTCATCTCTGACATCTCGTAAACTTAAGCGCAGTAAGAGCCTACCATCCAGTCCATTTCTTAATGCATACGGTTATTGAAGGTGAGGGACAATAATTGTGGGGGTAACACTTAGTGAATTATTCCTGGCATCTGGTTCCTA…
P0315B30	Thunnus thynnus	CATTCTTTGTTCCCCGTGCGCGCATATTTCATATGTCTGCGCATGTACATATATGTAATTACACCATATTCATATATAGACCATATATAATAATGTTTTAGGACATATATGTATTAAAACCATTACTAGTACTAAACCATTCATATGTCAATAAATAATGAAGATTTACATAAACCATACAAATAAACCTCAACATTCATTTTGAATTCAAGCGATTGAACGAGATTTAAGACCTAACATAAACCTAAATCGTCTAAGCCATACCAAGTCTCCTCATCTCTGACATCTCGTAAACTTAAGCGCAGTAAGAGCCTACCATCCAGTCCATTTCTTAATGCATACGGTTATTGAAGGTGAGGGACAATGATTGTGGGGGTAA
P0315B40	Thunnus thynnus	CGATCTAATTAACATTCTTTGTTCACCGTGCGCGCATATTTCATATGTCTGCGCATGTACATATATGTAATTACACCATATTCATATATAGACCATATATAATAATGTTTTAGGACATATATGTATTAAAACCATTACTAGTATTAAACCATTCATATGTCAATAAATAATGAAGATTTACATAAACCATACAAATAAACCTCAACATTCATCTTGAATTCAGGTGATTAAACGAGATTTAAGACCTAACATAAATCTAAATCGTCTAAGCCATACCAAGTCTCCTCATCTCTGACATCTCGTAAACTTAAGCGCAGTAAGAACCTACCATCCAGTCCATTTCTTAATGCATACGGTTATTGAAGGTGAGGGACAATAATTGTGGGGGTAACACTTAGT…
P0315G10	Thunnus thynnus	GGTTTAATTAACATTTTTTGTTCCCCGTGCGCGCATATTTAATATGTCTGCGCATGTACATATATGTAATCACACCATATTCATATATAGACCATATATAATAATGTTTTAGGACATATATGTATTAAAACCATTACTAGTATTAAACCATTCATATGTCAATAAATAATGAAGATTTACATAAACCATACAAATAAACCTCAGCATTCGTCTTGAATTCAGGCGATTAAACGAGATTTAAGACCTAACATAAACCTAAATCGTCTAAGCCATACCAAGTCTCCTCATCTCTGACATCTCGCAAACTTAAGCGCAGTAAGAGCCTACCATCCAGTCCATTTCTTAATGCATACGGTTATTGAAGGTGAGGGACAATAATTGTGGGGGTAACACTTAGTG…
P0315G20	Thunnus thynnus	CGAATCAAATTAACTTTCTTTGTTCCCCGTGCGCGCATATTTCATATGTCTGCGCATGTACATATATGTAATTACACCATATTCATATATAGACCATATACAATAATGTTCTAGGACATATATGTATTAAAACCATTACTAGTATTAAACCATTCATATGTCAATAAATAATGAAGATTTACATAAACCATATAAATAAGTCTCAACATTCATCTTGAATTCAGGCGATTAAACGAGATTTAAGACCTAACATAAATCTAAATCGTCTAAGCCATACCAAGTCTCCTCATCTCTAACATCTCGTAAATTTAAGCGCAGTAAGAGCCTACCATCCAGTCCATTTCTTAATGCATACGGTTATTGAAGGTGAGGGACAATAATTGTGGGGGTAACACTTAG…
P0315G30	Thunnus obesus	CGTTCTAATTAACATTCTTTGCTCCCCGTGCGCACATATCTCATATGTCTGCGCATGTACATATATGTAATTACACCATATCTATATATGGACCATATACAGTAATGTTCTAGGACATATATGTATTAAAACCATTACTAGTACTAAACCATTCATATATCAACAAATAATGAAGATTTACATAAACCATACAGATATATTCCAACATTCAAATTAAGTCAAGTAATTAAACGAGATTTAAGACCTACCACAAACACTAAATCGTCTAAGCCATACCAAGTCTCCTCATCCCTGAAGTCGAGTAAATTTAAGCGCAGTAAGAACCTACCATCCAGTCCATATCTTAATGCACACGGTTATTGAAGGTGAGGGACAATAATTGTGGGGGTAGCTCCCAGT…
P0315G40	Thunnus albacares	CGCTATCTATTAACTTTCTTTGTTCCCTATGCGCACATATTTCATATGTCTACGCATGTACATATATGTAATTACACCATACTCATATATCGACCATATATAATAATGCTTTAGGACATATATGTATTAAAACCATTACTAGTACTAAACCATTCATATGTCAACAAACAATGAAGATTTACATAAACCATACAGATATATCTTAATATTCAACCTAAGTCAAGTAATTAGACGAGATTTAAGACCTATCATAACGACTAAATCGTCTAAGCCATACCAAGTATCCCCATCCCTAAAATCAAGTAAATTTAAGCGCAGTAAGAGCCTACCATCCAGTCCATATCTTAATGCATACGGTTATTGAAGGTGAGGGACAATAATTGTGGGGGTAACACCTAG…
P0315T10	Thunnus obesus	TTGCTCCCCGTGCCCATATTTCATATGTCTACGCACGAACATATATGCAATAACACCATACTCATATGATAACCATATATAATAATGCCCTAGGACATATATGCATTAAAACCATTACTAGTACTAAACCATTCATATATCAACAAATAATGAAGGTTTACATAAACCATACAGGTATATCTCAACATCCATCCTAAGTCAAGTAATTAAACGAAACTTAAGACCTACCACAAACACTAAATCGTCTAAGCCAAACCAAGTCCCATCATCTCTAAAATCAAGTAAATTTAAGCGCAGTAAGAGCCTACCATCCAGTCCATATCTTAATGCATACGGTTATTGAAGGTGAGGGACAATAATTGTGGGGGTAACACTTAGTGAATTATTCCTGGCATCTGG…
P0315T40	Thunnus albacares	GGCACAATTAACATTCTTTGTTCCCTATGCGCACATATTTAATATGTCTACGCATGAACACATATGAAACAACACCATACACATAAAACGACCCAAAAAATAAAGCAAAAGGACAAACAAGAAAAAAAACCACAACAAGAACAAAACCACACATAAGACAACAAACAATGAAGATAAACATAAACCATACAGATATACCTCAATATCCGATCTAAGACAAGCAATCAGACGAGATCTAAGACCTACCATAACAACTAAATCGTCTAAGCCATACCAAGCATCCTCATACCTAAAGACAAGCAAATATAAGCGCAGTAAGAGCCTACCATCCAGTCCATATCTTAATGCATACGGTTATTGAAGGTAAGGGACAATGATTGTGGGGGTAACACCTAGTGA…
P0415B40	Thunnus thynnus	AGATCTATTAACATTCTTTGTTCCCCTGCGCAGAATTTACAATATGTCTGCGCATGTACATATATGTAATTACACCATAACTATATTTGAAACATATATAATAATGCTTTAGGACATGTATGTATTAAAACCATAACTAGTATTTAACCATTCATATGTCAACATATCATGAAGACTTACATAAAACATAGCAACCATCTCCCAACACTTTATTAATATCATGTAATTAGACGAGATTTAAGACCTAACATAAACCTAAATCGTCTAAGCCATACCAAGTCCCCTCATCTCTAAAATCCAGTAAACTTATGCGCAGTAAGAGCCTACCATCCAGTCCATTTCTTAATGCATACGGTTATTGAAGGTGAGGGACAATAATCGTGGGGGTAACACTTAGTG…
P0415G30	Thunnus thynnus	TGGGAAAAATTAACTATTGCTTTGTTCCCCGTGCGCGCATATTTCATATGTCTGCGCATGTACATATATGTAATTACACCATATTCATATATAGACCATATACAATAATGTTTTAGGACATATATGTATTAAAACCATTACTAGTATTAAACCATTCATATGTCAATAAATAATGAAGATTTACATAAACCATATAAATAAGCCTCAACATTCACCTTGAATTCAGGCGATTAAACGAGATTTAAGACCTAACATAAATCTAAATCGTCTAAGCCATACCAAGTCTCCTCATCTCTAACATCTCGTAAACTTAAGCGCAGTAAGAGCCTACCATCCAGTCCATTTCTTAATGCATACGGTTATTGAAGGTGAGGGACAATAATTGTGGGGGTAACACTT…
P0415G31	Thunnus albacares	ACTAATAAACCATTCTTTGTTCCCTATGCGCACATATTTCATATGTCTACGCATGTACATATATGTAATTACACCATACTCATATATCGACCATATATAATAATGCTTTAAGACATATATGTATTAAAACCATTACTAGTACTAAACCATTCATATGTCAACAAACAATGAAGACTTACATAAACCATACAGATATATCTTAATATTCGATCTAAGTCAAGTAATTAAACGAGATTTAAGATCTACCATAATAACTAAATCGTCTAAGCCATACCAAGTATCCCCATTCCTAAAGTCAGGTAAATTTAAGCGCAGTAAGAGCCTACCATCCAGTCCATATCTTAATGCATACGGTTATTGAAGGTGAGGGACAATGATTGTGGGGGTAACACCTAGTGA…
P0415G32	Thunnus albacares	TCAATTAAACATTGCTTTGTTCCCCATGCGCACATATTTCATATGTCTACGCATGTACATATATGTAATTACACCATACTCATATATCGACCATATATAATAATGCTTTAGGACATATATGTATTAAAACCATTACTAGTACTAAACCATTCATATGTCAACAAACAATGAAGATTTACATAAACCATACATATATATCTTAACATTTAATCTAAGTCAGGTAATTAAACGAGATTTAAGACCTACCACAACAACTAAATCGTCTAAGCCATACCAAGTATCCTCATCCCTAAAGTCAAGCAAATTTAAGCGCAGTAAGAGCCTACCATCCAGTCCATATCTTAATGCATACGGTTATTGAAGGTGAGGGACAATGATTGTGGGGGTAGCACCTAGTGA…
P0415G40	Thunnus thynnus	CGCCACAATAACACGTCCGCGCACGCACACACACGCAACCACACCACACCCACACACAGACACACACAACAACGCCCCAGGACAAACACGCACCAAAACCACAACAAGCAAAAAACCACCCAAACGCCAAAAAACAAAGAAGAACCACAAAAACCAAACAAAAAAACCACAGCACCCGTCCCGAACCCAGGCGATTAAACGAGATCCAAGACCTAACATAAATCTAAATCGTCTAAGCCATACCAAGCCTCCTCATCTCTGACATCTCGTAAACTTAAGCGCAGTAAGAGCCTACCATCCAGTCCATTTCTTAATGCATACGGTTATTGAAGGTGAGGGACAATAATTGTGGGGGTAACACTTAGTGAATTATTCCTGGCATCTGGTTCCTAATTTCA
P0415T20	Thunnus albacares	CTTCTTGTTCCCTATGCGCACATATTTGAATAGGCTACGCATGTACATATATGTAATTACACCATACTCATATATCGACCATATATAATAATGCTTTAGGACATATATGTATTAAAACCATTACTAGTACTAAACCATTCATATGTCAACAAACAATGAAGATTTACATAAACCATACAAATATATCTTAATATTCAATCTAAGTCAAGTAATTAAACGAGATTTAAGACCTACCATAACAACTAAATCGTCTAAGCCATACGAGAATCCCGGGTCCTAAGGTCAGATAGAGGTAAGCGCAGGAAGGGGGCTAGGATAGGGTAGGGGGAGTAAAGAGAGGGAAAA
P0415T40	Thunnus albacares	ATTTTCTTATTTTTGTTCCCTATGCGCACATATTTCATATGTCTACGCATGTACATATATGTAATCACACCATACCCATATATCGACCATATATAATAATGCTTTAGGACATATATGTATTAAAACCATTACTAGTACTAAACCATTCATATGTCAACAAACAATGAAGACTTACATAAACCATACAGATATATCTTAACATTCAACCTAAGTCAAGTAATTAAACGAGATTTAAGACCTACCATAACAACTAAATCGTCTAAGCCATACCAAGTATCCTCATTCCTAAAGTCAAGTAAATTTAAGCGCAGTAAGAGCCTACCATCCAGTCCATATCTTAATGCATACGGTTATTGAAGGTGAGGGACAATGATTGTGGGGGTAACACCTAGTGAATTA…
P0515B10	Thunnus thynnus	GCGCGCATATTTAATATGTCTGCGCATGTACATATATGTAATTACACCATATTCATATATAGACCATATATAATAATGTTTTAGGACATATATGTATTAAAACCATTACTAGTATTAAACCATTCATATGTCAATAAATAATGAAGATTTACATAAACCATACAAATAAACCTCAACATTCATCTTGAATTCAGGCGGTTAAACGAGATTTAAGACCTAGCATAAATCTAAATCGTCTAAGCCATACCAAGTCTCCTCATCTCTGACATCTCGTAAATTTAAGCGCAGTAAGAGCCTACCATCCAGTCCATTTCTTAATGCATACGGTTATTGAAGGTGAGGGACAATAATTGTGGGGGTAACACTTAGTGAATTATTCCTGGCATCTGGTTCCTAAT
P0515B20	Thunnus obesus	GAATATGTCTACGCACGTACATATATGTAATTACACCATACCTATATATTAACCATATAAAATAATGTTCTAGGACATACATGTATTAAAACCATTACTAGTATTAAACCATTCATATATCAACAAACAATGAAGGTTTACATAAACCATACAGACATATCTCAACATACATACTAAGTCAAGTAATTAAACGAAACTTAAGACCTACCACAAACGTTAAATCGTCTAAGCCAAACCAAGTCCCACCATCTCTAAAATCAAGTAAATTTAAGCGCAGTAAGAGCCTACCATCCAGTCCATATCTTAATGCATACGGTTATTGAAGGTGAGGGACAATAATTGTGGGGGTAACACTTAGTGAATTATTCCTGGCATCTGGTTCCTAATT
P0515B40	Thunnus thynnus	GTTCTGCGCATGTACATATATGTAATTACACCATACTCATATATAGACCATATATAATAATGTTTTAGGACATATATGTATTAAAACCATTACTAGTATTAAACCATTCATATGTCAATAAATAATGAAGATTTACATAAACCATACAAATAAACCTCAACATTCATCTTGAATTCAGGCGATTAAACGAGATTTAAGACCTAACATAAATCTAAATCGTCTAAGCCACACCAAGTCTCCTCATCTCTGACATCTCGTAAACTTAAGCGCAGTAAGAACCTACCATCCAGTCCATTTCTTAATGCATACGGTTATTGAAGGTGAGGGACAATAATTGTGGGGGTAACACTTAGTGAATTATTCCTGGCATCTGGTTCCTAA
P0515G10	Thunnus thynnus	TTCCCCGTGCGCGCATATTTAATATGTCTGCGCATGTACATATATGTAATTACACCATATTCATATATAGACCATATATAATAATGTTTTAGGACATACATGTATTAAAACCATTACTAGTATTAAACCATTCATATGTCAATAAATAATGAAGATTTACATAAACCATACAAATAAACCTCAACATTCATCTTGAATTCAAGCGATTAAACGAGATTTAAGACCTAACATAAATCTAAATCGTCTAAGCCACACCAAGTCTCCTCATCTCTGACATCTCGTAAACTTAAGCGCAGTAAGAGCCTACCATCCAGTCCATTTCTTAATGCATACGGTTATTGAAGGTGAGGGACAATAATTG
P0515G30	Thunnus albacares	CATTTAATATGTCTACGCATGTACATATATGTAATTACACCATACTCATATATCGACCATATATAATAATGCTTTAGGACATATATGTATTAAAACCATTACTAGTACTAAACCATTCATATGTCAACAAACAATGAAGATTTACATAAACCATACAGGTATATCTTAACATTCAACCTAAGTCAAGTAATTAGACGAGATTTAAGACCTACCATAACAACTAAATCGTCTAAGCCATACCAAGTATCCCCATTCCTAAAGTCGAGTAAATTTAAGCGCAGTAAGAACCTACCATCCAGTCCATATCTTAATGCATACGGTTATTGAAGGTGAGGGACAATGATTGTGGGGGTAACACCTAGTGAATTATTCCTGGCATCTGGTTCCTAATTCAA
P0515G40	Thunnus albacares	CATCATATGTCTACGCATGTACATATATGTAATTACACCATACTCATATATCGACCATATATAATAATGCTTTAGGACATATATGTATTAAAACCATTACTAGTACTAAACCATTCATATGTCAACAAATAATGAAGATTTACATAAACCATACATATATATCTTAACATTTAACCTAAGTCAAGTAATTAAACGAGATTTAAGACCTACCATAACAACTAAATCGTCTAAGCCATACCAAGTATCCTCATCCCTAAAGTCAAGCAAATTTAAGCGCAGTAAGAGCCTACCATCCAGTCCATATCTTAATGCATACGGTTATTGAAGGTGAGGGACAATGATTGTGAGGGTAGCACCTAGTGAATTATTCCTGGCATCTGGTTCCAA
P0515T20	Thunnus albacares	TTTTAATATGTCTACGCATGTACATATATGTAATTACACCATACTCATATATCGACCATATATAATAATGCTTTAGGACATATATGTATTAAAACCATTACTAGTACTAAACCATTCATATGTCAACAAACAATGAAGATTTACATAAACCATACAAATATATCTTAATATTCAATCTAAGTCGAGTAATTAAACGAGATTTAAGACCTAGCATAACAACTAAATCGTCTAAGCCATACCAAGTATCCCCATTCCTAAAATCAGGTAAATTTAAGCGCAGTAAGAGCCTACCATCCAGTCCATATCTTAATGCATACGGTTATTGAAGGTGAGGGACAATGATTGTGGGGGTAGCACCTAGTGAACTATTCCTGGCATCTGGTTCCTAATTCAA
P0515T30	Thunnus albacares	ATGTCTACGCATGTACATATATGTAATTACACCATACTCATATATCGACCATATATAATAATGCTTTAGGACATATATGTATTAAAACCATTACTAGTACTAAACCATTCATATGTCAACAAACAATGAAGATTTACATAAACCATACATATATATCTTAATATTTAATCTAAGTCAAGTAATTAAACGAGATTTAAGACCTACCATAATAACTAAATCGTCTAAGCCATACCAAGTATCCCCATTCCTAAAGTCAAGCAAATTTAAGCGCAGTAAGAGCCTACCATCCAGTCCATATCTTAATGCATACGGTTATTGAAGGTGAGGGACAATGATTGTGGGGGTAACACCTAGTGAATTATTCCTGGCATCTGGTTCCTAATTCA
P0515T40	Thunnus thynnus	GATTAATATGTCTGCGCATGTACATATATGTAATTACACCATATTCATATATAGACCATATATAATAATGTTTTAGGACATACATGTATTAAAACCATTACTAGTATTAAACCATTCATATGTCAATAAATAATGAAGATTTACATAAACCATACAAATAAACCTCAACATTCACCTTGAATTCAGGCGATTAAACGAGATTTAAGACCTAACATAAATCTAAATCGTCCAAGCCATACCAAGTCTCCTCATCTCTGACATCTCGTAAACTTAAGCGCAGTAAGAGCCTACCATCCAGTCCATTTCTTAATGCATACGGTTATTGAAGGTGAGGGACAATAATTGTGGGGGTAGCACTTAGTGAATTATTCCTGGCATCTGGTTCCTAATTCAAA
P0615B20	Thunnus thynnus	GCCGCATGTACATATATGTAATTACACCATATTCATATATAGACCATATATAATAATGTTTTAGGACATACATGTATTAAAACCATTACTAGTATTAAACCATTCATATGTCAATAAATAATGAAGATTTACATAAACCATACAAATAAACCTCAACATTCATCTTGAATTCAAGCGATTAAACGAGATTTAAGACCTAACATAAATCTAAATCGTCTAAGCCACACCAAGTCTCCTCATCTCTGACATCTCGTAAACTTAAGCGCAGTAAGAGCCTACCATCCAGTCCATTTCTTAATGCATACGGTTATTGAAGGTGAGGGACAATAATTGTGGGGGTAACACTTAGTGAATTATTCCTGGCATCTGGTTCCTAATTCA
P0615B30	Thunnus thynnus	GTCTGCGCATGTACATATATGTAATTACACCATATTCATATATAGACCATATACAATAATGTTTTAGGACATATATGTATTAAAACCATTACTAGTATTAAACCATTCATATGTCAATAAATAATGAAGATTTACATAAACCATATAAATAAGCCTCAACATTCACCTTGAATTCAGGCGATTAAACGAGATTTAAGACCTAACATAAATCTAAATCGTCTAAGCCATACCAAGTCTCCTCATCTCTAACATCTCGTAAACTTAAGCGCAGTAAGAGCCTACCATCCAGTCCATTTCTTAATGCATACGGTTATTGAAGGTGAGGGACAATAATTGTGGGGGTAACACTTAGTGAACTATTCCTGGCATC
P0615G10	Thunnus albacares	ATGTCTACGCATGTACATATATGTAATTACACCATACTCATATATCGACCATATATAATAATGCTTTAGGACATATATGTATTAAAACCATTACTAGTACTAAACCATTCATATGTCAACAAACAATGAAGATTTACATAAACCATACAGATATATCTTAATATTCAATCTAAGTCAAGTAATTAAACGAGATTTAAGACCTACCATAACAACTAAATCGTCTAAGCCATACCAAGTATCCCCATTCCTAAAGTCAGGTAAATTTAAGCGCAGTAAGAACCTACCATCCAGTCCATATCTTAATGCATACGGTTATTGAAGGTGAGGGACAATGATTGTGGGGGTAACACCTAGTGAATTATTCCTGGCA
P0615G30	Thunnus obesus	TGTCTACGCACGTACATATATGTAATTACACCATACTTATATATTAACCATATACAATAATGTTCTAGGACATATATGTATTAAAACCATTACTAGTATTAAACCATTCATATGTCAACAAACAATGAAGGTTTACATAAACCATACAGACATATCTCAACATCCTTACTAAGTCGAGTAATTAAACGAAATTTAAGACCTACCACAAACACTAAATCGTCTAAGCCAAACCAAGTCCCACCATCTCTAAAATCAAGTAAATTTAAGCGCAGTAAGAGCCTACCATCCAGTCCATATCTTAATGCATACGGTTATTGAAGGTGAGGGACAATAATTGTGGGGGTAACACTTAGTGAATTATTCCTGGCAT
P0615G40	Thunnus obesus	TTTATTTAATATGTCTGCGCACGTACATATATGTAATTACACCATATCTATATATGAACCATATACAGTAATGTTCTAGGACATACATGTATTAAAACCATTACTAGTACTAAACCATTCATATATCAACAAACAATGAAGACTTACATAAACCATACAGATATATTCCAACATTCAAGTTAAATCAAGTAATTAAACGAGATTTAAGACCTACCACAAACACTAAATCGTCTAAGCCATACCAAGTCTCCTCATTCCTGAAATCAAGTAAATTTAAGCGCAGTAAGAGCCTACCATCCAGTCCATATCTTAATGCATACGGTTATTGAAGGTGAGGGACAATGATTGTGGGGGTAGCACTCAGTGAATTATTCCTGGCATCTGGTTCCTAATTCG
P0615T10	Thunnus albacares	TGCGCACATATTTCATATGTCTACGCATGTACATATATGTAATTACACCATACTCATATATCGACCATATATAATAATGCTTTAGGACATACATGTATTAAAACCATTACTAGTACTAAACCATTCATATGTCAACAAACAATGAAGACTTACATAAACCATACAGATATATCTTAATATTCAACCTAAGTCAAGTAATTAAACGAGATTTAAGACCTACCATAACAACTAAATCGTCTAAGCCATACCAAGTATCCCCATTCCTAAAGTCAGGTAAATTTAAGCGCAGTAAGAGCCTACCATCCAGTCCATATCTTAATGCATACGGTTATTGAAGGTGAGGGACAATGATTGTGGGGGTAACACCTAGTGAATTATTCCTGGCATCTGGTTCCTAA
P0615T20	Thunnus thynnus	TGTCTGCGCATGTACATATATGTAATTACACCATATTCATATATAGACCATATATAATAATGTTTTAGGACATACATGTATTAAAACCATTACTAGTATTAAACCATTCATATGCCAACAAACAATGAAGATTTACATAAACCATACAAATAAATCTCAACATTCATTTTGAATTCAGGCGATTAAACGAGATTTAAGACCTAACATAAATCTAAATCGTCTAAGCCATACCAAGTCCCCTCATCTCTGACATCTCGTAAACTTAAGCGCAGTAAGAGCCTACCATCCAGTCCATTTCTTAATGCATACGGTTATTGAAGGTGAGGGACAATAATTGTGGGGGTAACACTTAGTGAATTATTCCTGGCAT
P0615T40	Thunnus thynnus	TAACAATATGTCTGTGCATGTACATATATGTAATTACACCATAACTATATTTAAAACATAAATAATAATGCTTTGAGACATATATGTATTACAACCATAACTAGTACTTAACCACTCATATGTCAACATATCATGAAGACTTACATAAAGCATGACAATTATCTTTCAACATCCTACCTACATCACGTAATTAAACGAGATTTAAGACCTACCATAAACCTAAATCGTCTAAGCCATACCAAGTCCCCTCATCTCTGAAATCTAGTAAACTTAAGCGCAGTAAGAGCCTACCATCCAGCTCATTTCTTAATGCATACGGTTATTGAAGGTGAGGGACAATAATTGTGGGGGTAACACTTAGTGAACTATTCCTGGCATCTGGTTCCT
P0715B40	Thunnus thynnus	TCATGTCTGCGCATGTACATATATGTAATCACACCATATTCATATATAGACCATATATAATAATGTTTTAGGACATATATGTATTAAAACCATTACTAGTACTAAACCATTCATATGTCAATAAATAATGAAGATTTACATAAACCATACAAATAAACCTCAACATTCATTTTGAATTCAGGCGATTGAACGAGATTTAAGACCTAACATAAACCTAAATCGTCTAAGCCATACCAAGTCTCCTCATCTCTGACATCTCGTAAACTTAAGCGCAGTAAGAGCCTACCATCCAGTCCATTTCTTAATGCATACGGTTATTGAAGGTGAGGGACAATGATTGTGGGGGTAACACTTAGTGAATTATTCCTGGCATCTGGTTCC
P0715G30	Thunnus thynnus	TGTGCATGTACATATATGTAATCACACCATAACTATATTTGAAACATATATAATAATGCTTTAGGACATATATGTATTAAAACCATAACTAGTATTTAACCATTCATATGTCAACATATCATGAAGACTTACATAAGACATAACAACCATCTCCCAACACTTTATTTATATCACGTAATTAGACGAGATTTAAGACCTAACATAAACCTAAATCGTCTAAGCCATACCAAGTCCCCTCATCTCTAAAATCTAGTAAACTTATACGCAGTAAGAGCCTACCATCCAGTCCATTTCTTAATGCATACGGTTATTGAAGGTGAGGGACAATAATCGTGGGGGTAACACTTAGTGAATTATTCCTGGCATCTGG
P0715T30	Thunnus albacares	ACGCACATATTTCATATGTCTACGCATGTACATATATGTAATTACACCATACTCATATATTAACCATATATAATAATGCTTTAGGACATATATGTATTAAAACCATTACTAGTACTAAACCATTCATATGTCAACAAACAATGAAGATTTACATAAACCATACAGATATATCTTAATATTCAATCTAAGTCAAGTAATTAAACGAGATTTAAGACCTACCATAATAACTAAATCGTCTAAGCCATACCAAGTATCCCCATTCCTAAAGTCAGGTAAACTTAAGCGCAGTAAGAGCCTACCATCCAGTCCATATCTTAATGCATACGGTTATTGAAGGTGAGGGACAATGATTGTGGGGGTAACACCTAGTGAATTATTCCTGGCATCTGGTTCCAAGG
P0715T40	Thunnus obesus	CCTTCTATATGTCTACGCACGTACATATATGTAATTACACCATACTTATATATTAACCATATACAATAATGTTCTAGGACATATATGTATTAAAACCATTACTAGTATTAAACCATTCATATGTCAACAAACAATGAAGGTTTACATAAACCATACAGACATATCTCAACATCCTTACTAAGTCAAGTAATTAAACGAAATTTAAGACCTACCACAAACACTAAATCGTCTAAGCCAAACCAAGTCCCACCATCTCTAAAATCAAGTGAATTTAAGCGCAGTAAGAGCCTACCATCCAGTCCATATCTTAATGCATACGGTTATTGAAGGTGAGGGACAATAATTGTGGGGGTAACACTTAGTGAATTATTCCTGGCATCTGGTTCC
P0815B20	Thunnus thynnus	CCGCGCATATTTCATATGTCTGCGCATGTACATATATGTAATTACACCATATTCATATATAGACCATATATAATAATGTTTTAGGACATATATGTATTAAAACCATTACTAGTATTAAACCATTCATATGTCAATAAATAATGAAGATTTACATAAACCATACAAATAAACCTCAACATTCATCTTGAATTCAGGCGATTAAACGAGATTTAAGACCTAACATAAATCTAAATCGTCTAAGCCATACCAAGTCTCCTCATCTCTGACATCTCGTAAACTTAAGCGCAGTAAGAACCTACCATCCAGTCCATTTCTTAATGCATACGGTTATTGAAGGTGAGGGACAATAATTGTGGGGGTAACACCTAGTGAATTATTCCTGGCATCTGGTTCCTAATT…
P0815B40	Thunnus obesus	TATTTCATATGTCTACGCACGTACATATATGTAATTACACCATACTTATATATTAACCATATACAATAATGTTCTAGGACATATATGTATTAAAACCATTACTAGTATTAAACCATTCATATGTCAATAAACAATGAAGGTTTACATAAACCATACAGACATATCTCAACATCCACACTAAGTCAAGTAATTAAACGAAATTTAAGACCTACCACAAACGCTAAATCGTCTAAGCCAAACCAAGTCCCATCATCTCTAAAATCAAGTAAACTTAAGCGCAGTAAGAGCCTACCATCCAGTCCATATCTTAATGCATACGGTTATTGAAGGTGAGGGACAATAATTGTGGGGGTAACACTTAGTGAATTATTCCTGGCATCTGGTTCCTAATTCAAC
P0815G10	Thunnus albacares	CATGTACATATATGTAATTACACCATACTCATATATCGACCATATATAATAATGCTTTAGGACATATATGTATTAAAACCATTACTAGTACTAAACCATTCATATGTCAACAAACAATGAAGATTTACATAAACCATACATATATATCTTAACATTTAATCTAAGTCAAGTAATTAAACGAGATTTAAGACCTACCATAACAACTAAATCGTCTAAGCCATACCAAGTATCCTCATTCCTAAAGTCAAGCAAATTTAAGCGCAGTAAGAGCCTACCATCCAGTCCATATCTTAATGCATACGGTTATTGAAGGTGAGGGACAATGATTGTGGGGGTAGCACCTAGTGAATTATTCCTGGCATCTGGTTCCAAT
P0815G20	Thunnus obesus	CATATTTAAATATGTCTACGCACGTACATATATGTAATTACACCATATTCATATATAGACCATATATAATAATGTTTTAGGACATATATGTATTAAAACCATAACTAGTATTAAACCATTCATATGTCAACAAACAATGAAGATTTACATAAACCATACGAATATATTCCAACATTTAAATTAAGTCAAGTAATTAAACGAGATTTAAGACCTACCATAAACACTAAATCGTCTAAGCCATACCAAGTCCCCCCATCTCTGAAATCAAGTAAATTTAAGCGCAGTAAGAGCCTACCATCCAGTCCATATCTTAATGCATACGGTTATTGAAGGTGAGGGACAATAATCGTGGGGGTAACACCTAGTGAATTATTCCTGGCATCTGGTTCCTAATTCAAAC
P0815G30	Thunnus obesus	GCCTGTCTACGCACGTACATATATGTAATTACACCATACTTATATATTAACCATATACAATAATGTTCTAGGACATATATGTATTAAAACCATTACTAGTATTAAACCATTCATATATCAACAAATAATGAAGGTTTACATAAACCATACAGACATATCCCAACATCCATACTAAGTCAAGTAATTAAACGAAACTTAAGACCTACCACAAACACTAAATCGTCTAAGCCAAACCAAGTCTCATCATCTCTAAAATCAAGTAAATTTAAGCGCAGTAAGAGCCTACCATCCAGTCCATATCTTAATGCATACGGTTATTGAAGGTGAGGGACAATAATTGTGGGGGTAACACTTAGTGAATTATTCCTGGCATCTGGTTCCTAATTCAACAA
P0815G40	Thunnus thynnus	CGTGCGCGCATATTTCATATGTCTGCGCATGTACATATATGTAATTACACCATATTCATATATAGACCATATACAATAATGTTTTAGGACATATATGTATTAAAACCATTACTAGTATTAAACCATTCATATGTCAATAAATAATGAAGATTTACATAAACCATATAAATAAGTCTCAACATTCATTTTGAATTCAGGCGATTAAACGAGATTTAAGACCTAACATAAATCTAAATCGTCTAAGCCATACCAAGTCTCCTCATCTCTAACATCTCGTAAATTTAAGCGCAGTAAGAGCCTACCATCCAGTCCATTTCTTAATGCATACGGTTATTGAAGGTGAGGGACAATAATTGTGGGGGTAACACTTAGTGAACTATTCCTGGCATCTGGTTCCTA…
P0815T20	Thunnus albacares	TGCGCACACATTTCACATCCCACGCACGCACATCACGCAACCACACCACACCCCACACCGACCCACACAACAACGCCCCAGGACACACACGCACCAAAACCACCACCAGCACCAAACCACCCACACGCCAACAAACAATGAAGATCTACATAAACCATACAGATACATCTTAATATTCAACCTAAGCCAAGCAATTAAACGAGATTTAAGACCTACCATAACAACTAAATCGTCTAAGCCATACCAAGTATCCTCATTCCTAAAGTCAGGTAAATTTAAGCGCAGTAAGAGCCTACCATCCAGTCCATATCTTAATGCATACGGTTATTGAAGGTGAGGGACAATGATTGTGGGGGTAGCACCTAGTGAATTATTCCTGGCATCTGGTTCTAA
P0815T30	Thunnus thynnus	CAACCCCACACGTCCGCGCCGCACACACACGCAACCACACCACACCCCACACAGACCCACACAATAACGCCTTAGGACATATATGCATTAAAACCATTACTAGTATTAAACCATTCATATGTCAATAAATAATGAAGATTTACATAAACCATACAAATAAGCCTCAACATTCATTTTGAATTCAGGCGATTAAACGAGATTTAAGACCTAACATAAATCTAAATCGTCTAAGTCATACCAAGTCTCCTCATCTCTAACATCTCGTAAACTTAAGCGCAGTAAGAGCCTACCATCCAGTCCATTTCTTAATGCATACGGTTATTGAAGGTGAGGGACAATAATTGTGGGGGTAACACTTAGTGAATTATTCCTGGCATCTGGTTCCTAAT
P0815T40	Thunnus albacares	GCGCACACACTTTCATATGTCCACGCACGTACATATATGTAATTACACCATACTCATATATCGACCATATATAATAATGCTTTAGGACATATATGTATTAAAACCATTACTAGTACTAAACCATTCATATGTCAACAAACAATGAAGATTTACATAAACCATACAGATATATCTTAACATTCAACCTAAGTCAAGTAATTAAACGAGATTTAAGACCTACCATAACAACTAAATCGTCTAAGCCATACCAAGTATCCCCATTCCTAAAATCGAGTAAATTTAAGCGCAGTAAGAACCTACCATCCAGTCCATATCTTAATGCATACGGTTATTGAAGGTGAGGGACAATGATTGTGGGGGTAACACCTAGTGAATTATTCCTGGCATCTGGTTCCTAAT…
P0915G40	Thunnus obesus	ACATATTTAATATGTCTGCGCACGTACATATATGTAATTACACCATATCTATATATGGACCATATACAGTAATGTTCTAGGACATATATGTATTAAAACCATTACTAGTACTAAACCATTCATATATCAACAAACAATGAAGACTTACATAAACCATACAGATATATTCCAACATTCAAGTTAAGTCAGGTAATTAAACGAGATTTAAGACCTACCACAAGCACTAAATCGTCTAAGCCATACCAAGTCTCCTCATCCCTGAAATCGAGTAAATTTAAGCGCAGTAAGAACCTACCATCCAGTCCATATCTTAATGCATACGGTTATTGAAGGTGAGGGACAATAATTGTGGGGGTAGCACTCAGTGAATTATTCCTGGCATCTGGTTCCTAATTCAAA…
P0915T40	Thunnus obesus	ATATTAATATATACAATAATGTTCTAGGACATATATGTATTAAAACCATTACTAGTATTAAACCATTCATATGTCAACAAACAGTGAAGGTTTACATAAACCATACAGACATATCCCAACATCCACACTAAGTCAAGTAATTAAACGAAACTTAAGACCTACCACAAACATTAAATCGTCTAAGCCAAACCAAGTCCCATCATCTCTAAAATCGAGTAAATTTAAGCGCAGTAAGAGCCTACCATCCAGTCCATATCTTAATGCATACGGTTATTGAAGGTGAGGGACAATAATTGTGGGGGTAACACTTAGTGAATTATTCCTGGCATCTGGTTCCTAATTCAACA
P1015B20	Thunnus thynnus	GTTAGGACATATATGTATTAAAACCATTACTAGTACTAAACCATTCATATGTCAATAAATAATGAAGATTTACATAAACCATACAAATAAACCTCAACATTCATCCTGAATTCAGGCGATTAAACGAGATTTAAGACCTAGCATAAATCTAAATCGTCTAAGCCATACCAAGTCTCCTCATCTCTGACATCTCGTAAACTTAAGCGCAGTAAGAGCCTACCATCCAGTCCATTTCTTAATGCATACGGTTATTGAAGGTGAGGGACAATAATTGTGGGGGTAACACTCAGTGAATTATTCCTGGCATCTGGTTCC
P1015B30	Thunnus albacares	TGCACATATTTCATATGTCTACGCATGTACATATATGTAATTACACCATACTCATATATCGACCATATATAATAATGCTTTAGGACATATATGTATTAAAACCATTACTAGTACTAAACCATTCATATGTCAACAAACAATGAAGATTTACATAAACCATACAGATATATCTTAACATTCAACCTAAGTCAAGTAATTAGACGAGATTTAAGACCTACCATAACAACTAAATCGTCTAAGCCATACCAAGTATCCCCATTCCTAAAGTCGAGTAAATTTAAGCGCAGTAAGAACCTACCATCCAGTCCATATCTTAATGCATACGGTTATTGAAGGTGAGGGACAATGATTGTGGGGGTAGCACCTAGTGAATTATTCCTGGCATCTGGTTCCTAATTC…
P1015B40	Thunnus albacares	CGCACACACTTTCATATGTCTACGCATGTACATATATGTAATTACACCATACTCATATATCGACCATATATAATAATGCTTTAGGACATATATGTATTAAAACCATTACTAGTACTAAACCATTCATATGTCAACAAACAATGAAGATTTACATAAACCATACAGATATATCTTAATATTCAATCTAAGTCAAGTAATTAAACGAGATTTAAGACCTACCATAACAACTAAATCGTCTAAGCCATACCAAGTATCCTCATTCCTAAAGTCAAGTAAATTTAAGCGCAGTAAGAACCTACCATCCAGTCCATATCTTAATGCATACGGTTATTGAAGGTGAGGGACAATGATTGTGGGGGTAACACCTAGTGAATTATTCCTGGCATCTGGTTCCTAATT
P1015G20	Thunnus obesus	GTGCGCACATATTTCATATGTCTGCGCACGTACATATATGTAATTACACCATATCTATATATGAACCATATACAGTAATGTTCTAGGACATATATGTATTAAAACCATTACTAGTACTAAACCATTCACATATCAACAAACAATGAAGACTTACATAAACCATACAGATATATTCCAACATTCAAATTAAGCCAAGTAATTAAACGAGATTTAAGACCTACCACAAACACTAAATCGTCTAAGCCATACCAAGTCCCCTCATCCCTGAAATCAAGTAAATTTAAGCGCAGTAAGAACCTACCATCCAGTCCATATCTTAATGCATACGGTTATTGAAGGTGAGGGACAATAATCGTGGGGGTAGCACTCAGTGAATTATTCCTGGCATCTGGTTCCTAA…
P1015G40	Thunnus albacares	GCGCACATATTTCATATGTCTACGCATGTACATATATGTAATTACACCATACTCATATATCGACCATATATAATAATGCTTTAGGACATATATGTATTAAAACCATTACTAGTACTAAACCATTCATATGTCAACAAACGATGAAGATTTACATAAACCATACAGATATATCTCAATATTCAACCTAAGTCAAGTAATTAGACGAGATTTAAGATCTACCACAATAACTAAATCGTCTAAGCCATACCAAGTATCCCCATCCCTAAAGTCAAGTAAATTTAAGCGCAGTAAGAGCCTACCATCCAGTCCATATCTTAATGCATACGGTTATTGAAGGTGAGGGACAATGATTGTGGGGGTAACACTTAGTGAATTATTCCTGGCATCTGGTTCCTAATT…
P1015T10	Thunnus albacares	ATGCGCACATATTTCATATGTCTACGCATGTACATATATGTAATTACACCATACTCATATATCGACCATATATAATAATGCTTTAGGACATATATGTATTAAAACCATTACTAGTATTAAACCATTCATATGTCAACAAACCATGAAGATTTACATAAACCATACAGATATATCTTAATATTCAGTCTAAGTCAAGTAATTAGACGAGATTTAAGATCTACCATAATAACTAAATCGTCTAAGCCATACCAAGTATCCCCATCCCTAAAGTCAAGTAAATTTAAGCGCAGTAAGAGCCTACCATCCAGTCCATATCTTAATGCATACGGTTATTGAAGGTGAGGGACAATGATTGTGGGGGTAACACTTAGTGAATTATTCCTGGCATCTGGTTCCTAA…
P1015T40	Thunnus albacares	CGCACATATTTCATATGTCTACGCATGTACATATATGTAATTACACCATACTCATATATCGACCATATATAATAATGCTTTAGGACATATATGTATTAAAACCATTACTAGTACTAAACCATTCATATGTCAACAAACAATGAAGATTTACATAAACCATACATATATATCTTAATATTTAATCTAAGTCAAGTAATTAAACGAGATTTAAGACCTACCATAACAACTAAATCGTCTAAGCCATACCAAGTATCCTCATTCCTAAAGTCAAGCAAATTTAAGCGCAGTAAGAACCTACCATCCAGTCCATATCTTAATGCATACGGTTATTGAAGGTGAGGGACAATGATTGTGGGGGTAACACCTAGTGAATTATTCCTGGCATCTGGTTCCTAATTCA
P1114B10	Thunnus albacares	ATATGTAATTACACCATACTCATATATCGACCATATATAATAATGCTTTAGGACATATATGTATTAAAACCATTACTAGTACTAAACCATTCATATGTCAACAAACAATGAAGATTTACATAAACCATACATATATATCTTAATATTTAATCTAAGTCAAGTAATTAAACGAGATTTAAGACCTACCATAACAACTAAATCGTCTAAGCCATACCAAGTATCCTCATTCCTAAAGTCAAGCAAATTTAAGCGCAGTAAGAGCCTACCATCCAGTCCATATCTTAATGCATACGGTTATTGAAGGTGAGGGACAATGATTGTGGGGGTAACACCTAGTGAATTATTCCTGGCATCTGGTTCCTAATT
P1114B40	Thunnus thynnus	ATATGTAATTACACCATATTCATATATAGACCATATATAATAATGTTTTAGGACATATATGTATTAAAACCATTACTAGTATTAAACCATTCATATGCCAATAAATAATGAAGATTTACATAAACCATACAAATAAACCTCAACATTCATCTTGAATTCAGGCGATTAAACGAGATTTAAGACCTAACATAAATCTAAATCGTCTAAGCCATACCAAGTCTCCTCATCTCTGACATCTCGTAAACTTAAGCGCAGTAAGAACCTACCATCCAGTCCATTTCTTAATGCATACGGTTATTGAAGGTGAGGGACAATAATTGTGGGGGTAACACCTAGTGAATTATTCCTGGCATCTGGTTCCTAATT
P1114G10	Thunnus thynnus	ATATGTAATTACACCATATTCATATATAGACCATATATAATAATGTTTTAGGACATGTATGTATTAAAACCATTACTAGTATTAAACCATTCATATGTCAATAAATAATGAAGATTTACATAAACCATACAAATAAGCCTCAACATTCATCTTGAATTCAGGCGATTAAACGAGATTTAAGACCTAACATAAATCTAAATCGTCTAAGCCACACCAAGTCTCCTCATCTCTGACATCTCGTAAACTTAAGCGCAGTAAGAGCCTACCATCCAGTCCATTTCTTAATGCATACGGTTATTGAAGGTGAGGGACAATAATTGTGGGGGTAACACTTAGTGAATTATTCCTGGCATCTGGTTCCTAATT
P1114G40	Thunnus thynnus	ATATGTAATTACACCATATTCATATATAGACCATATATAATAATGTTTTAGGACATATATGTATTAAAACCATTACTAGTATTAAACCATTCATATGTCAATAAATAATGAAGATTTACATAAACCATACAAATAAACCTCAGCATTCGTCTTGAATTCAGGCGATTAAACGAGATTTAAGACCTAACATAAATCTAAATCGTCTAAGCCATACCAAGTCTCCTCATCTCTGACATCTCGTAAACTTAAGCGCAGTAAGAGCCTACCATCCAGTCCATTTCTTAATGCATACGGTTATTGAAGGTGAGGGACAATAATTGTGGGGGTAACACTTAGTGAATTATTCCTGGCATCTGGTTCCTAATTCA
P1114T10	Thunnus albacares	ATATGTAATTACACCATACTCATATATCAACCATATATAATAATGCTTTAGGACATATATGTATTAAAACCATTACTAGTACTAAACCATTCATATATCAACAAACAATGAAGATTTACATAAACCATACAGATATATCTTGATATTCAATCTAAGTCAGGTAATTAAACGAGATTTAAGACCTACCACAACAACTAAATCGTCTAAGCCACACCAAGTATCCTCATTCCTAAAGTCAGGTAAATTTAAGCGCAGTAAGAGCCTACCATCCAGTCCATATCTTAATGCATACGGTTATTGAAGGTGAGGGACAATGATTGTGGGGGTAACACCTAGTGAATTATTCCTGGCATCTGGTTCCTAATTCA
P1114T40	Thunnus thynnus	ATATGTAATTACACCATATTCATATATAGACCATATATAATAATGTTTTAGGACATATATGTATTAAAACCATTACTAGTATTAAACCATTCATATGTCAATAAATAATGAAGATTTACATAAACCATACAAATAAACCTCAACATTCATCTTGAATTCAGGCGATTAAACGAGATTTAAGACCTAGCATAAATCTAAATCGTCTAAGCCATACCAAGTCTCCTCATCTCTGACATCTGCGTAAACTTAAGCGCAGTAAGAGCCTACCATCCAGTCCATTTCTTAATGCATACGGTTATTGAAGGTGAGGGACAATAATTGTGGGGGTAACACTTAGTGAACTATTCCTGGCATCTGGTTCCTAATT
P1214B20	Thunnus albacares	ATATGTAATTACACCATACTCATATATCGACCATATATAATAATGCTTTAGGACATATATGTATTAAAACCATTACTAGTACTAAACCATTCATATATCAACAAACAATGAAGATTTACATAAACCATACAGATATATCTTAATATTCAATCTAAGTCAAGTAATTAGACGAGATTTAAGACCTACCATAATAACTAAATCGTCTAAGCCATACCAAGTATCCCCATTCCTAAAGTCAAGTAAATTTAAGCGCAGTAAGAACCTACCATCCAGTCCATATCTTAATGCATACGGTTATTGAAGGTGAGGGACAATGATTGTGGGGGTAACACCTAGTGAATTATTCCTGGCATCTGGTTCCTAATTCAA
P1214B30	Thunnus albacares	ATATGTAATTACACCATACTCATATATCGACCATATATAATAATGCTTTAGGACATATATGTATTAAAACCATTACTAGTACTAAACCATTCATATGTCAACAAACAATGAAGATTTGCATAAACCATACATATATATCTTAATATTCAATCTAAGTCAAGTAATTAAACGAGATTTAAGACCTACCATAACAGCTAAATCGTCTAAGCCATACCAAGTATCCTCATTCCTAAAGTCAAGCAAATTTAAGCGCAGTAAGAGCCTACCATCCAGTCCATATCTTAATGCATACGGTTATTGAAGGTGAGGGACAATAATTGTGGGGGTAACACCTAGTGAATTATTCCTGGCATCTGGTTCCTAATTCAA
P1214B40	Thunnus albacares	AATGCTTTAGGACATATATGTATTAAAACCATTACTAGTACTAAACCATTCATATGTCAACAAACAATGAAGACTTACATAAACCATACAGATATATCTTAACATTCAACCTAAGTCAAGTAATTAAACGAGATTTAAGATCTACCATAACAACTAAATCGTCTAAGCCATACCAAGTATCCACATTCCTAAAGCCAGGTAAATTTAAGCGCAGTAAGAGCCTACCATCCAGTCCATATCTTAATGCATACGGTTATTGAAGGTGAGGGACAATGATTGTGGGGGTAACACCTAGTGAATTATTCCTGGCATCTGGTTCCTAATTCAA
P1214G10	Thunnus albacares	ATATGTAATTACACCATACTCATATATCGACCATATATAATAATGCTTTAGGACATATATGTATTAAAACCATTACTAGTACTAAACCATTCATATGTCAACAAACAATGAAGACTTACATAAACCATACAGATATATCTTAACATTCAACCTAAGTCAAGTAATTAAACGAGATTTAAGACCTACCATAACAACTAAATCGTCTAAGCCATACCAAGTATCCCCATTCCTAAAGTCGGGTAAATTTAAGCGCAGTAAGAGCCTACCATCCAGTCCATATCTTAATGCATACGGTTATTGAAGGTGAGGGACAATGATTGTGGGGGTAACACCTAGTGAATTATTCCTGGCATCTGGTTCCTAATTCA
P1214G30	Thunnus albacares	ATATGTAATTACACCATACTTATATATCGACCATATATAATAATGCTTTAGGACATATATGTATTAAAACCATTACTAGTACTAAACCATTCATATGTCAACAAACAATGAAGATTTACATAAACCATACAGATATATCTTAATATTCAATCTAAGTCAAGTAATTAAACGAGATTTAAGACCTACCATAACAACTAAATCGTCTAAGCCATACCAAGTATCCCCATCCCTAAAGTCAGGTAAATTTAAGCGCAGTAAGAACCTACCATCCAGTCCATATCTTAATGCATACGGTTATTGAAGGTGAGGGACAATGATTGTGGGGGTAACACCTAGTGAATTATTCCTGGCATCTGGTTCCTAATTCAA
P1214G40	Thunnus obesus	ATATGTAATTACACCATATCTATATATGAACCATATACAGTAATGTTCTAGGACATATATGTATTAAAACCATTACTAGTACTAAACCATTCATATATCAACAAACAATGAAGACTTACATAAACCATACAAATATATTCCAACATTCAAGTTAAGTCAAGTAATTAAACGAGATTTAAGACCTACCACAAACACTAAATCGTCTAAGCCATACCAAGTCTCCCCATCCCTGAAATCAAGTAAATTTAAGCGCAGTAAGAACCTACCATCCAGTCCATATCTTAATGCATACGGTTATTGAAGGTGAGGGACAATAATTGTGGGGGTAGCACTCAGTGAATTATTCCTGGCATCTGGTTCCTAATTCAA
P1214T40	Thunnus albacares	ATATGTAATTACACCATACTCATATATCGACCATATATAATAATGCTTTAGGACATATATGTATTAAAACCATTACTAGTACTAAACCATTCATATGTCAACAAACAATGAAGATTTACATAAACCATACATATATATCTTAATATTTAATCTAAGTCAAGTAATTAAACGAGATTTAAGATCTACCATAACAACTAAATCGTCTAAGCCATACCAAGTATCCTCATTCCTAAAGTCAAGCAAATTTAAGCGCAGTAAGAGCCTACCATCCAGTCCATATCTTAATGCATACGGTTATTGAAGGTGAGGGACAATGATTGTGGGGGTAGCACTTAGTGAATTATTCCTGGCATCTGGTTCCTAATTCA
